# Supplementary material for: Correlates and aetiological factors associated with hedonic well-being among an ageing population of US men and women: secondary data analysis of a national survey
Source: PubMed Central journal article supplement — BMJ Open. 2018 Nov 13;8(11):e020962. doi: 10.1136/bmjopen-2017-020962 (PMC6252705; doi:10.1136/bmjopen-2017-020962), 2018-11-13
Supplement: bmjopen-2017-020962.draft_revisions.pdf [file bmjopen-2017-020962.draft_revisions.pdf]

# BMJ Open

BMJ Open is committed to open peer review. As part of this commitment we make the peer review history of every article we publish publicly available.

When an article is published we post the peer reviewers' comments and the authors' responses online. We also post the versions of the paper that were used during peer review. These are the versions that the peer review comments apply to.

The versions of the paper that follow are the versions that were submitted during the peer review process. They are not the versions of record or the final published versions. They should not be cited or distributed as the published version of this manuscript.

BMJ Open is an open access journal and the full, final, typeset and author-corrected version of record of the manuscript is available on our site with no access controls, subscription charges or pay-per-view fees (<http://bmjopen.bmj.com>).

If you have any questions on BMJ Open's open peer review process please email [info.bmjopen@bmj.com](mailto:info.bmjopen@bmj.com)

# BMJ Open

## **Correlates and Etiological Factors Associated with Hedonic Well-Being Among an Aging Population of US Men and Women: secondary data analysis of a national survey**

|                               |                                                                                                                                                                                                                                                                                                                                                                     |
|-------------------------------|---------------------------------------------------------------------------------------------------------------------------------------------------------------------------------------------------------------------------------------------------------------------------------------------------------------------------------------------------------------------|
| Journal:                      | <i>BMJ Open</i>                                                                                                                                                                                                                                                                                                                                                     |
| Manuscript ID                 | bmjopen-2017-020962                                                                                                                                                                                                                                                                                                                                                 |
| Article Type:                 | Research                                                                                                                                                                                                                                                                                                                                                            |
| Date Submitted by the Author: | 09-Dec-2017                                                                                                                                                                                                                                                                                                                                                         |
| Complete List of Authors:     | Odlum, Michelle; Columbia University, School of Nursing<br>Davis, Nicole; Clemson University School of Nursing<br>Owens, Otis; University of South Carolina College of Social Work<br>Preston, Michael; University of Arkansas for Medical Sciences<br>Brewer, Russell; Louisiana Public Health Institute<br>Black, Danielle; Columbia University School of Nursing |
| Keywords:                     | Ageing, Well-being, Gender differences, Health-related Quality of Life                                                                                                                                                                                                                                                                                              |
|                               |                                                                                                                                                                                                                                                                                                                                                                     |

SCHOLARONE™  
Manuscripts

View Only

1  
2  
3  
4 Correlates and Etiological Factors Associated with Hedonic Well-Being Among an Aging Population of US Men  
5 and Women: secondary data analysis of a national survey  
6

7 Michelle Odlum, EdD, MPH<sup>1</sup>, Nicole Davis, PhD, RN<sup>2</sup>, Otis Owens, PhD, MPH, Michael Preston, PhD, MPH<sup>4</sup>,  
8 Russell Brewer, DrPH, MPH<sup>3</sup>, and Danielle Black, MS, MPH<sup>5,1</sup>  
9

10 <sup>1</sup>Columbia University School of Nursing

11 <sup>2</sup>Clemson University School of Nursing

12 <sup>3</sup>University of South Carolina

13 <sup>4</sup>University of Arkansas for Medical Sciences

14 <sup>5</sup>Louisiana Public Health Institute

15 <sup>5</sup>Columbia University Mailman School of Public Health  
16  
17  
18

19 Corresponding Author: Michelle Odlum mlo12@columbia.edu 242 W 112<sup>th</sup> Street 5C New York, NY 10026  
20

21 **Author, addresses and affiliations:**

22  
23 Michelle Odlum, EdD, MPH  
24 Assistant Professor of Nursing  
25 Columbia University  
26 School of Nursing  
27 560 W 168 Street  
28 New York, NY, 10032  
29 347-806-2090  
30

31 Nicole Davis, PhD, RN  
32 Assistant Professor of Nursing  
33 Clemson University  
34 School of Nursing  
35 University Center of Greenville  
36 225 S. Pleasantburg Drive, Suite B-5  
37 Greenville, SC 29607  
38 770-639-1501  
39  
40

41 Otis Owens, PhD, MPH  
42 Assistant Professor  
43 University of South Carolina  
44 College of Social Work  
45 1512 Pendleton St.  
46 Columbia, SC 29208  
47 901-218-2852  
48

49 Michael Preston, PhD, MPH  
50 Assistant Professor  
51 University of Arkansas for Medical Sciences  
52 4301 W Markham St  
53 Little Rock, AR 72205  
54 501-526-7101  
55  
56  
57  
58  
59  
60

Russell Brewer, DrPH, MPH  
Director, HIV and STI Portfolio  
Louisiana Public Health Institute  
1515 Poydras, Suite 1200  
New Orleans, LA 70112  
504-301-9825

Danielle Black, MA, MPH  
Graduate Research Assistant  
Columbia University  
School of Nursing  
617 W 168 Street  
New York, NY, 10032  
910-547-4907

## ABSTRACT

**Objective.** To understand the gender-specific factors that uniquely contribute to successful aging in a US population of men and women, 57-85 years of age. This was achieved through the examination of the correlates of subjective well-being defined by health-related quality of life (HRQoL), across several biological and psychosocial determinants of health.

**Design.** Cross sectional study

**Setting.** The NSHAP (National Social Life, Health and Ageing Project, 2010-11) a representative sample of the US population.

**Participants.** 3,377 adults aged 57 to 85 (1538 men, 1839 women) from the NSHAP.

**Main outcome measures.** The bio-psychosocial factors of Biological/Physiological Function, Symptom Status, Functional Status, General Health Perceptions and HRQoL-happiness.

**Method.** HRQoL was measured using the NSHAP Wave 2 multistage, stratified area probability sample of US households (N=3,377). Variable selection was guided by the Wilson's and Cleary's Model (WCM) that classifies health outcomes at five main levels and characteristics.

**Results.** Our findings indicate differences in bio-psychosocial factors comprised in the WCM and their relative importance and unique impact on HRQoL by gender. Women reported significantly lower HRQoL than men ( $t=3.5$ ,  $df=3366$ ). The most significant contributors to HRQoL in women were mental health ( $B=0.31$ ; 0.22, 0.39), loneliness ( $B=-0.26$ ; -0.35, -0.17), urinary incontinence ( $B=-0.22$ ; -0.40, -0.05) and support from spouse/partner ( $B=0.27$ ; 0.10, 0.43), and family ( $B=0.12$ ; 0.03, 0.20). Men indicated mental health ( $B=0.21$ ; 0.14, 0.29), physical health ( $B=0.17$ ; 0.10, 0.23), functional difficulties ( $B=0.38$ ; 0.10, 0.65), loneliness ( $B=-0.20$ ; -0.26, -0.12), depression ( $B=-0.36$ ; -0.58, -0.15) and support from friends ( $B=0.06$ ; 0.10, 0.11) as significant contributors. Those with greater social support had better HRQoL ( $F=4.22$ ,  $df=4$ ). Lack of companionship and reliance on spouse/partner were significant HRQoL contributors in both groups.

**Conclusion.** Our findings offer insight into aging, gender and subjective well-being. The results provided an opportunity to identify bio-psychosocial factors to inform interventions to support successful aging.

### Strengths and limitations of this study

- A variety of bio-psychosocial factors that contribute to well-being by gender were compared, where prior studies have not used gender as an independent variable.
- Effect sizes were used to summarize our regression analyses for a manageable and clinically interpretable picture of the unique contribution of gender across the comprehensive Wilson Cleary Model's (WCM), linking bio-psychosocial factors to overall well-being defined as Health Related Quality of Life - happiness.
- We were unable to establishing a cause-effect relationship or to determine changes in perceptions over time based on our cross-sectional analysis.
- We were limited to define the WCM levels based on variables in the NSHAP; yet with the variety of indicators captured in the NSHAP, this was a minor limitation.
- Beyond identified limitations, results mirrored prior research and contributed to the understanding of HRQoL gender-based differences, while controlling for potential confounders including age, race/ethnicity and socioeconomic status.

## INTRODUCTION

Successful aging was traditionally defined as the absence of disease and associated functional limitations.<sup>1</sup> However, the definition has shifted to a multidimensional view that accounts for psychosocial and cultural aspects of health and health related quality of life (HRQoL).<sup>1,2</sup> This shift in definition is driven by patient center care, patient empowerment and shared decision making with providers in the healthcare setting.<sup>2</sup> In fact, HRQoL is now viewed as an important complement to biomedical measures of health.<sup>3</sup> An important indicator of successful aging is subjective well-being, an aspect of HRQoL. Subjective well-being, is a direct predictor of health outcomes affecting biological, physical, and psychosocial changes in older adults.<sup>4,5</sup> Improvements in population-level well-being is an aspiration of society, sparking policy and economic debates.<sup>6</sup> Studies of life satisfaction have shown that subjective well-being is affected by a multitude of additional factors, including social and familial relationships. These additional factors may be protective, potentially decreasing or eliminating the chronic disease and symptom burden.<sup>6</sup>

Three approaches exist to capture subjective well-being; these are life evaluation (e.g., life satisfaction); hedonic well-being (e.g., experienced happiness, anger); and eudemonic well-being (e.g., life meaning and purpose).<sup>6</sup> Researchers suggest subjective well-being be a measure for healthcare resources allocation. Therefore, the need exists to further identify and understand the factors associated with successful aging.<sup>2,7</sup> It is also essential to compare these factors between men and women to determine the unique contribution of gender.<sup>2</sup> Evidence to date remains unclear as prior studies of gender differences have focused on specific chronic diseases or on socioeconomic and demographic factors, usually controlling for gender as a potential confounder and not as an independent variable.<sup>8</sup> Therefore, we sought to identify the correlates and etiological factors associated with hedonic well-being, specifically feelings of happiness, through a bio-psychosocial lens, accounting for gender variability, in an aging population of US adults. Happiness, served as a proxy for HRQoL. It is a measure of life satisfaction, the absence or presence of desirable or undesirable feelings or experiences. It is proven useful in the analysis of HRQoL.<sup>9</sup>

Guided by the Wilson's and Cleary's Conceptual Model (WCM), Figure 1 we analyzed the National Social Life, Health and Aging Project (NSHAP), second wave data. We examined whether objective (e.g., biological/physiological) and self-perceived measures (e.g., functional status) of health explain gender differences in HRQoL (i.e., happiness). Self-rated perceptions of health have been observed to correlate with other health indicators including morbidity.<sup>10</sup> We determined the best models predicting the HRQoL of male and female US adults ages 57 to 85.<sup>11</sup> We explored the extent to which the WCM levels interact to predict HRQoL and provide greater insight into aging. The bio-psychosocial WCM was selected for our analysis as it considers health outcomes on a continuum of increasing complexity and health trajectories associated with aging. It is also shown to enhance knowledge about HRQoL in diverse populations.<sup>11</sup> The model classifies health outcomes at five main levels.<sup>11</sup> The first level Biological/Physiological function, examines the individual as a whole. Symptoms (level 2), are the perceptions of physical, emotional, and cognitive states. Symptoms are considered significant determinants of Functional Status (level 3), with biological and symptom variables evidenced to be correlated with Functional Status. General Health Perceptions (level 4) are subjective appraisals of health and Overall Quality of Life (level 5) as a whole.<sup>11</sup> Variables that comprise each level interact in complex ways to determine HRQoL. Arrows linking the five main levels indicate dominant causal relationships. In addition, the five main levels are influenced by individual (e.g., age, education) and environmental characteristics (e.g., social support).<sup>11</sup> Studies of hedonic states, including happiness, have predicted morbidity and mortality. However, confounding factors indicate that well-being is coupled with additional factors such as education.<sup>10</sup> The WCM controls for potential confounding. Additionally, different than prior studies that compared the quantified HRQoL scores across gender, we identified the hierarchical differences of each WCM level and their weighted contribution to HRQoL (happiness).

## METHODS

**Participants.** The second wave of the NSHAP survey, a National sample of US adults ages 57 to 85, was utilized in our analysis, was conducted from 2010-2011.<sup>12</sup> The survey focused on exploring interpersonal connections and overall health outcomes as they relate to: culture, gender and socioeconomic status; health behaviors; health care

utilization, social support, and well-being.<sup>12</sup> Our current study utilized Wave 2 data to explore the relationship between the WCM constructs for both men and women. Wave 2, with its large sample size (N=3,377) and strong methodology, allowed us to systematically investigate important aspects of HRQoL and aging.

**Measures.** NSHAP variables used in our analysis were selected based on best fit with the WCM constructs. We categorized the five main levels and characteristics of the WCM under two overarching categories of Objective and Subjective health indicators, Figure 1. The Objective indicators of the first main level of Biological/Physiological Function were, Body Mass Index (BMI), average pulse rate, and average blood pressure (systolic and diastolic). The last four main levels of the WCM comprised Subjective health indicators. These included the assessment of participant perceptions of health outcomes on both individual and societal levels. Variables that comprised Symptom Status were pain, pain level, depression, anxiety, fatigue, urinary incontinence and stool incontinence. Variables that comprised Functional Status were physical function difficulty, perceptions of control, companionship and feeling left out or isolated. Variables that comprised General Health Perceptions were self-rated physical and mental health. Our outcome variable of interest for HRQoL in this study was defined by hedonic well-being: self-rated happiness, asking participants thoughts and feelings about their life overall. The WCM also accounts for important individual and environment influences directly impacting objective and subjective indicators. Variables that comprise Individual Characteristics were insurance coverage, age group, education, race/ethnicity, and provider visits. Variables that comprise Environmental Characteristics were marital status, reliance on spouse, partner, relatives and friends, and number of friends.

Figure 1. Operationalized Wilson Cleary Model with study-specific bio-psychosocial measures

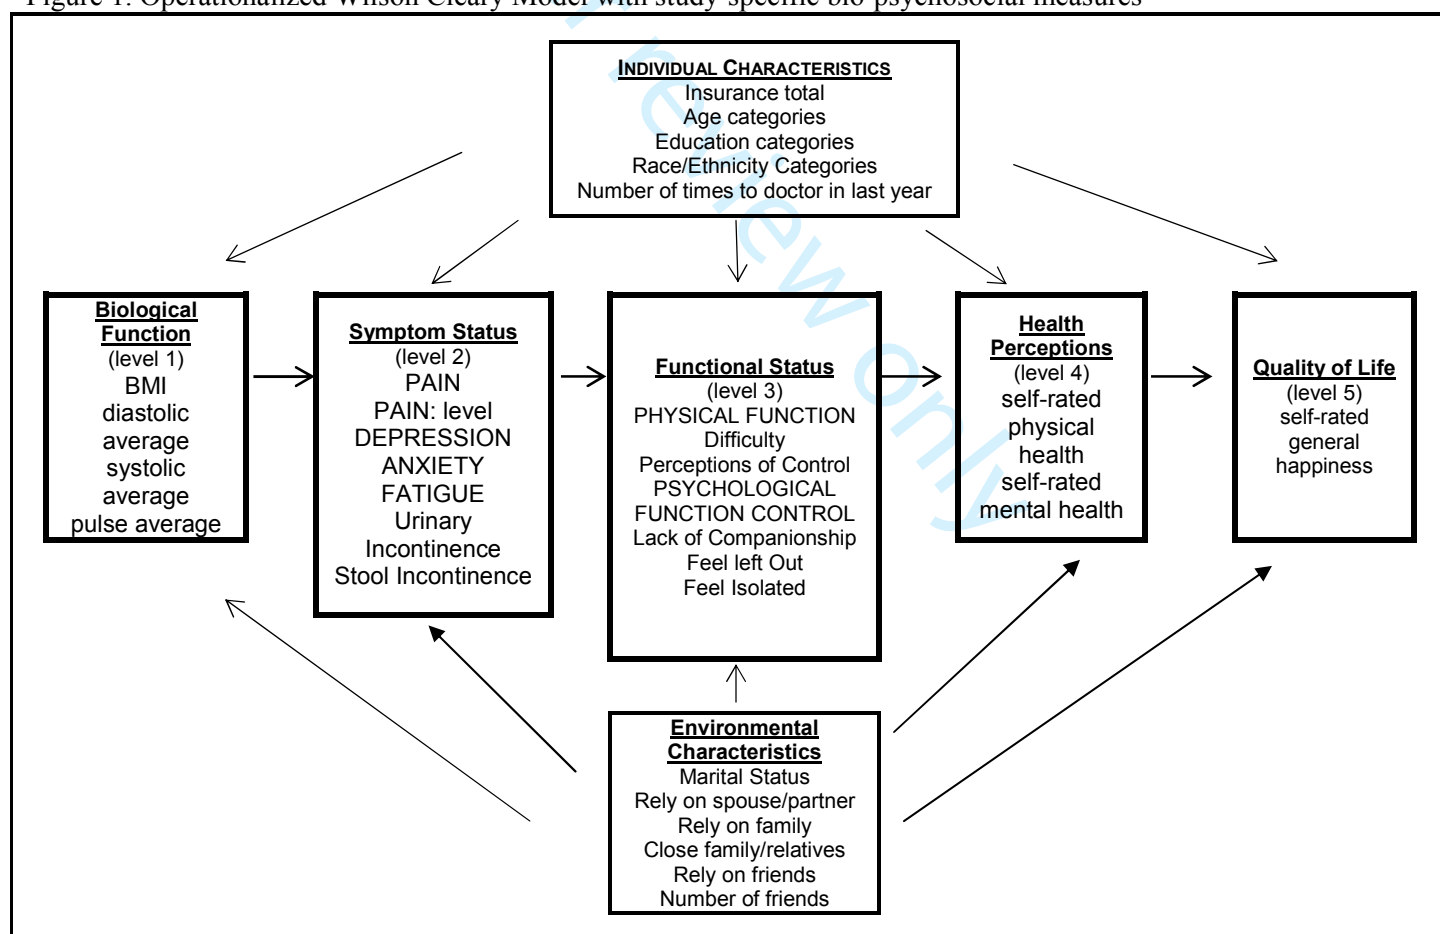

**Statistical analysis.** The association between HRQoL (i.e., happiness) and the constructs of the WCM were examined in separate analyses for male and female participants. Descriptive statistics were conducted to characterize the sample and variable distributions. Participant characteristics were summarized with means and standard deviations for continuous variables and percentages and frequencies for categorical variables. Individual and environmental characteristics were also examined for potential confounding. Pearson Product Moment Correlations (PPMCs) were calculated to determine the relationship between the WCM construct and characteristic variables and reported HRQoL by participants. Chi square analyses were used to assess differences in categorical variables. Linear regression analyses were performed to assess the relevant importance of significantly correlated variables that potentially contribute to HRQoL. Variables with significant differences ( $p < 0.05$ ) were retained for additional analysis.

Two independent stepwise multiple regressions (i.e., men and women) were performed to identify variables as a group best associated with HRQoL. Retained variables were ranked by partial  $R^2$  order to determine their relative contribution. Effect sizes were also estimated for each retained variable with t-values corresponding to the coefficient estimates divided by the associated standard errors. To identify constructs with the most consistent associations with HRQoL, effect sizes and  $R^2$  rankings were averaged per WCM construct for men and women. Data analysis was conducted with use of SPSS 21.0. The stepwise approach allows for the prevention of bias in the selection of variables in the final model.<sup>13 14</sup>

**Patient Involvement.** As an analysis of secondary data, no participants were not involved in the development of our research questions or with the analysis of the outcome measures. Additionally, participants were not involved with the interpretation of data or the writing of our analytic findings. Dissemination of analytic findings to study participants or members of their associated communities will not be accomplished.

|                                   | <i>N</i> | <i>(%)</i> |
|-----------------------------------|----------|------------|
| <b>Gender</b>                     |          |            |
| <b>Male</b>                       | 1538     | 45.5       |
| 69 or Under                       | 585      | 38.0       |
| 70-79                             | 610      | 39.7       |
| 80 or older                       | 343      | 22.3       |
| <b>Female</b>                     | 1839     | 54.5       |
| 69 or Under                       | 812      | 44.2       |
| 70-79                             | 633      | 34.4       |
| 80 or older                       | 394      | 21.4       |
| <b>Race</b>                       |          |            |
| non-Black, non-Hispanic           | 2493     | 73.8       |
| Black or African American         | 517      | 15.3       |
| non-Black Hispanics               | 367      | 10.9       |
| <b>Education</b>                  |          |            |
| more than High School             | 1899     | 56.2       |
| High School or less               | 1478     | 43.8       |
| <b>Insurance Coverage</b>         |          |            |
| Medicaid-Medicare                 | 2307     | 81.3       |
| Private                           | 411      | 14.5       |
| None                              | 121      | 4.3        |
| <b>Marital Status</b>             |          |            |
| Married                           | 2286     | 67.7       |
| Not currently Married             | 32.3     | 1091       |
| <b>Partnership if non-Married</b> |          |            |
| No                                | 890      | 88.5       |



## RESULTS

A total of 3,377 participants were included in the analysis. The majority of participants (54.5%) were women. The largest percentage of men were in the 70-79 age group (39.7%) with the largest percentage of women in the 69 and under age group (44.2%). The sample was predominantly non-Black, non-Hispanic (73.8%, N=2493). Most participants had at least a high school education (56.2%, N=1899). More than two-thirds were married (67.7%, N=2286). Of those who indicated they were unmarried, 88.5% (N=890) were not in any romantic, intimate, or sexual partnerships. More than two-thirds had health care coverage in the form of Medicaid, Medicare, or a combination of both (81.3%, N=2307). Table 1 provides a breakdown of the demographic characteristics.

**Table 2. Correlations: Variables Associated with Men and Women and HRQoL (N=3,377)**

|                                      |                                           | HRQoL: self-rated general happiness |         |
|--------------------------------------|-------------------------------------------|-------------------------------------|---------|
|                                      |                                           | Men                                 | Women   |
| BIOLOGICAL/PHYSIOLOGICAL<br>FUNCTION | BMI                                       | .011                                | .005    |
|                                      | diastolic average                         | -.011                               | .020    |
|                                      | systolic average                          | -.004                               | .022    |
|                                      | pulse average                             | -.021                               | .011    |
| SYMPTOM STATUS                       | PAIN                                      | -.084**                             | -.099** |
|                                      | PAIN: level                               | -.103**                             | -.088** |
|                                      | DEPRESSION                                | -.308**                             | -.343** |
|                                      | ANXIETY                                   | -.172**                             | -.214** |
|                                      | FATIGUE                                   | .210**                              | .217**  |
|                                      | Urinary Incontinence                      | -.039                               | -.070*  |
|                                      | Stool Incontinence                        | -.024                               | -.073*  |
| FUNCTIONAL STATUS                    | PHYSICAL FUNCTION<br>Difficulty           | -.136**                             | -.181** |
|                                      | Perceptions of Control                    | -.096**                             | -.101** |
|                                      | Psychological Function<br>Control         | .016                                | .024    |
|                                      | Lack of Companionship                     | -.365**                             | -.391** |
|                                      | Feel left Out                             | -.332**                             | -.335** |
|                                      | Feel Isolated                             | -.344**                             | -.361** |
| GENERAL HEALTH<br>PERCEPTIONS        | self-rated physical health                | .312**                              | .277**  |
|                                      | self-rated mental health                  | .412**                              | .428**  |
| INDIVIDUAL<br>CHARACTERISTICS        | Insurance total                           | .021                                | .002    |
|                                      | Age categories                            | -.026                               | -.086** |
|                                      | Education categories                      | .059*                               | .089**  |
|                                      | Race/Ethnicity<br>Categories              | .045                                | .028    |
|                                      | Number of times to<br>doctor in last year | -.061*                              | -.138** |
| ENVIRONMENTAL<br>CHARACTERISTICS     | Marital Status                            | -.168**                             | -.156** |
|                                      | Rely on spouse/partner                    | .183**                              | .243**  |
|                                      | Rely on family                            | .114**                              | .126**  |
|                                      | Close family/relatives                    | .119**                              | .151**  |
|                                      | Rely on friends                           | .097**                              | .170**  |
|                                      | Number of friends                         | .178**                              | .149**  |



Bivariate correlation analyses were initially conducted to examine the associations between the outcome HRQoL variable and those that comprised the WCM constructs. For men, of the original 31 variables, bivariate correlation analysis led to the elimination of 6 variables, for women the elimination of seven variables, Table 2. All significantly correlated variables were then screened by simple linear regression. For men, regression analysis led to the elimination of 13 variables, for women the elimination of 17 variables. HRQoL happiness scores were compared by the total scores for men, women and participants combined across the categorized age groups (69 or younger, 70-79, 80 or older). Significant results were observed across age groups for combined participants ( $X^2=18.6$ ,  $p=.017$ ) and for women ( $X^2=20.1$ ,  $p=.010$ ), both having significantly lower HRQoL score with increasing age.

**Table 3. WCM Constructs and HRQoL Outcomes ( $N=3,377$ )**

|                               | Partial R <sup>2</sup> | Partial R <sup>2</sup> Rank | Effect Size (t-value) | Average R <sup>2</sup> Ranks | Average Effect Sizes (t-values) |
|-------------------------------|------------------------|-----------------------------|-----------------------|------------------------------|---------------------------------|
| <b>MEN</b>                    |                        |                             |                       |                              |                                 |
| GENERAL HEALTH PERCEPTIONS    | 0.24, 1.8              | 1, 3                        | 8.3, 5.9              | 2                            | 7.1                             |
| FUNCTIONAL STATUS             | 0.21, .07              | 2, 6                        | 7.2, 2.2              | 4                            | 4.7                             |
| SYMPTOM STATUS                | 0.14                   | 4                           | 4.8                   | 4                            | 4.8                             |
| ENVIRONMENTAL CHARACTERISTICS | 0.09                   | 5                           | 3.0                   | 5                            | 3.0                             |
| <b>WOMEN</b>                  |                        |                             |                       |                              |                                 |
| GENERAL HEALTH PERCEPTIONS    | 0.39                   | 1                           | 9.4                   | 1                            | 9.4                             |
| FUNCTIONAL STATUS             | 0.33                   | 2                           | 7.9                   | 2                            | 7.9                             |
| SYMPTOM STATUS                | 0.03                   | 5                           | 0.68                  | 5                            | 0.68                            |
| ENVIRONMENTAL CHARACTERISTICS | 0.16, 0.12             | 3, 4                        | 3.6, 2.6              | 3.5                          | 3.09                            |

A second linear regression analysis was conducted. Partial R<sup>2</sup> were ranked from 1 (most important) -5 (least important) for men and women separately, with significant variables identified in the second linear regression analyses. Additionally, the last two columns on Table 3 contain the average of the R<sup>2</sup> ranking and the average effect sizes. The highest ranking variable for overall HRQoL happiness for men was General Health Perceptions (self-rated: mental health and physical health), Symptom Status (CESD- Depression score) and Functional Status (Lack companionship) both ranked second based on R<sup>2</sup> ranks, with Symptom Status having a greater average effect size. Physical Function Difficulty and Environmental Characteristics (Rely on spouse/partner) were last. Our regression analyses identified variables that, in the presence of all others, make a unique and direct contribution to HRQoL happiness.<sup>10</sup> The highest ranking variable for overall HRQoL for women was General Health Perceptions (mental health), followed by Functional Status (Lack of Companionship), Environmental Characteristics (Rely on spouse/partner and Number of close family members) and Symptom Status (urinary incontinence). The hierarchy of contributing WCM constructs to overall HRQoL are ranked for men and women, Table 4.

**Table 4. Hierarchy of HRQoL Contributors based on Average Effect Sizes (N=3,377)**

| Rank         | Item Descriptions             |                                                                                 |
|--------------|-------------------------------|---------------------------------------------------------------------------------|
| <b>MEN</b>   |                               |                                                                                 |
| 1st          | GENERAL HEALTH PERCEPTIONS    | Self-rated: mental health and physical health                                   |
| 2nd          | SYMPTOM STATUS                | Depression                                                                      |
| 3rd          | FUNCTIONAL STATUS             | Lack companionship, Physical Function Difficulty                                |
| 4th          | ENVIRONMENTAL CHARACTERISTICS | Number of close friends                                                         |
| <b>WOMEN</b> |                               |                                                                                 |
| 1st          | GENERAL HEALTH PERCEPTIONS    | Self-rated: mental health                                                       |
| 2nd          | FUNCTIONAL STATUS             | Lack companionship<br>Rely on spouse/partner and Number of close family members |
| 3rd          | ENVIRONMENTAL CHARACTERISTICS | members                                                                         |
| 4th          | SYMPTOM STATUS                | Urinary Incontinence                                                            |

## DISCUSSION

Understanding subjective well-being and its association with health in older adults is still in its early stages. Consequently, the extent to which a variety of bio-psychosocial factors attribute to well-being and account for gender-related differences remain unclear. To explore this further, we utilized the WCM which offers the most comprehensive view of pathways linking the most relevant bio-psychosocial variables to overall well-being defined as HRQoL happiness.<sup>2,11,15,16</sup> Epidemiologic studies of happiness have predicted long term morbidity and mortality. Previous studies have shown that subjective well-being is not universal across populations, yet Individual Characteristics including, education and race/ethnicity, did not significantly contribute to HRQoL happiness in our population.<sup>10</sup> Our results did however, identify significant differences between men and women in the type and contribution of bio-psychosocial factors to HRQoL happiness. The overall models allowed for us to observe the interplay between various aspects of aging by gender.<sup>11</sup>

### Mechanisms and Implications

Women reported significantly lower HRQoL than men. Our findings also indicated a significant decrease in HRQoL as age increased for the entire sample and for women. A decrease in HRQoL was also observed for men, but the results were not significant. Previous studies have identified lower HRQoL in populations of older women. It is hypothesized that gender-related differences in HRQoL of older adults may be in their perceptions of symptoms and illness progression, with men being less focused on symptom recognition until they are severe.<sup>8</sup> Interestingly, although there were no significant differences in perceptions of physical health between men and women in our analysis, it was the greatest contributor of HRQoL in men. Similarly, the third greatest contributor to HRQoL in men was the Functional Status level factor Physical Function Difficulty, also not observed in women. Prior studies have indicated that functional difficulty generally comprise the majority of an individual's functional health status, which in our study again was only associated with men. This is an interesting finding and may be attributed to the increased likelihood of men suffering from more severe and life threatening chronic conditions than women.<sup>8</sup> Instead, women are more likely to suffer from non-life threatening diseases including autoimmune disorders.<sup>8</sup> Social support significantly contributed to HRQoL in both men and women. The lack of companionship under the Functional Status level was significant in both groups. These findings align with the literature on loneliness in older ages and its adverse effects on HRQoL.<sup>17,18</sup> The reduction of inter-generational living and greater geographic expansion, has increased the report of loneliness in populations of older adults. Loneliness directly increases the likelihood of chronic diseases and all-cause mortality.<sup>21</sup> In our sample, the number of close family members was seen a significant contributor to HRQoL for women only. Having close family members may be more important to women, with 41 percent of the female sample reported being unmarried, only 21.9 percent of men. Additionally, HRQoL scores were significantly higher for married women. For those who reported being unmarried with a romantic, intimate, or sexual partner, men were significantly higher at 22.5 percent and women at 6.9 percent. Participants who reported greater social support from partners and relatives had higher HRQoL. Unhealthy familial relationships were predictors of loneliness in a prior study, particularly for the unmarried.<sup>17,18</sup> Their findings identify family ties as the most significant contributor to loneliness.<sup>17,18</sup> This aligns with our findings as women who reported a greater number of reliable family members had significantly higher HRQoL scores.

Therefore, the need exists for the consideration of social networks<sup>19,20</sup> and their impact on HRQoL in risk assessment and intervention development to improve aging-related outcomes. Previous studies have also shown that men and women who were satisfied with their family relationship had 1.8 and 3.0 times higher odds of good HRQoL, respectively. Frequent contacts and visits with friends or family motivate the participation in activities and increase HRQoL.<sup>20,21</sup>

The highest level significant contributor to HRQoL in both men and women was the General Health Perceptions level which both comprised of mental health. In fact, those who reported better mental health outcomes reported higher HRQoL. Men reported better mental health at a significantly higher level than women. Yet, depression was the only significant factor for the Symptom Status level in men alone and was the second highest contributor to their HRQoL. Other studies have shown that mental health concerns and symptoms of depression significantly impact HRQoL.<sup>2,11,22</sup> Our findings align with the literature on depression, with depression in women reported to be higher.<sup>15,23,2,11,24-27</sup> In fact, in our sample, depression scores for women were significantly higher than for men. Yet, depression was a major contributor to HRQoL only in men. Studies have shown that unmarried men have lower HRQoL compared to married men. Our findings show significantly higher depression scores for married men in our sample. Those who reported having demanding or critical spouses or did not spend much time with their spouses had significantly higher Depression scores. Though not significant in the hierarchical model, women with demanding and critical spouses also reported significantly higher depression scores. These results further reinforce our findings that relationship quality is a major contributor to HRQoL. Urinary incontinence was the only significant factor in the Symptom Status level for women. Those with urinary incontinence had significantly lower HRQoL scores. Our findings align with the literature, with recent studies indicating that women were more likely to report urinary incontinence and impaired HRQoL.<sup>28,29</sup> Studies have also shown that self-image is considered to be more important to women than men. In fact, in a study comparing HRQoL indicators between older men and women, a positive attitude about oneself was ranked in the top ten only for women.<sup>30,31</sup> Urinary incontinence may impact self-image, increasing the likelihood of depression and social isolation. Our findings indicate women who report urinary incontinence had significantly higher Depression scores; consistent with the higher likelihood of Depression and anxiety disorders in women compared to men.<sup>8</sup>

### Strengths and limitations

Our analysis was based on a cross-sectional, single wave (Wave 2) of the NSHAP data and does not allow for establishing a cause-effect relationship or the determination of changes in perceptions over time. Our analysis is also limited to define the WCM levels based on variables included in the NSHAP, a limitation inherent to secondary data analysis. However, with the variety of indicators that comprise the NSHAP, this was a minor limitation. HRQoL was measured with one item of self-reported happiness in the NSHAP.

Variables that may potentially impact HRQoL are not identified, yet our analytic approach provides a minimum collection of variables necessary to begin the development of structural equation models to observe directional relationships. Our single item analysis may be considered less sensitive than the use of other HRQoL measures or validated tool. Yet, beyond the identified limitations, our study findings mirrored and reinforce prior research and further contributed to understanding HRQoL differences between older men and women while adjusting for confounders including age, race/ethnicity and socioeconomic status.

### Conclusions and implications

The current analysis provides additional evidence to support insight into subjective well-being as it relates to successful aging. The findings of our analysis enhances our understanding of the bio-psychosocial factors that impact the HRQoL of older men and women. Our results add to the literature on successful aging in addition to the utility of the WCM in understanding the impact of HRQoL based on a variety of associated factors that comprise the models levels. We observed both similarities and differences between men and women based on the levels that best contribute to HRQoL. Further investigation is needed to determine the causal factors of the identified relationships between WCM levels and HRQoL. Other indicators of subjective well-being (e.g., life evaluations and eudemonic well-being) must also be assessed to inform collaborative care informed by mental and physical health.<sup>10</sup> In addition to informing the development of effective interventions to improve well-being independent of morbidity, income and other aging related factors that have adversely contributed to poor health outcomes.

**Contributors:**

The first author (MO) designed the work and analyzed the data. All authors assisted substantially in the data interpretation (MO, ND, OO, MP, RB), manuscript drafting (MO), revising for important intellectual content (MO, ND, OO, MP, RB, DB), final manuscript approval (MO, ND, OO, MP, RB, DB) and agreed accountability for all aspects of this work (MO, ND, OO, MP, RB, DB).

**Funding:** The National Social Life, Health and Aging Project is supported by the National Institute on Aging of the National Institutes of Health (R37AG030481; R01AG033903). The content is the responsibility of the authors and does not necessarily represent the official views of the National Institutes of Health.

**Competing Interests:** Authors have completed the Unified Competing Interest form at [http://www.icmje.org/coi\\_disclosure.pdf](http://www.icmje.org/coi_disclosure.pdf) (available upon request from the corresponding author) and declare that (1) our authors had no involvement with any company in the submission of this work; (2) our authors have no relationships with any companies that might be interested in the work that has been submitted in the previous 3 years; (3) our authors spouses, partners, or children have no financial relationships relevant to the work that has been submitted; and (4) our authors have no non-financial interests relevant to the work that has been submitted.

**Ethical approval:** The NSHAP data analysis was carried out with de-identified, unrestricted Wave 2 Public Use File v1 designed for public dissemination. This dataset is appropriate for preliminary analyses and for the exploration of health and functioning of older American adults.

**Data sharing:** Wave 2 Public Use File v1 data for the National Social Life Health and Aging Project are available at <http://www.icpsr.umich.edu/icpsrweb/NACDA/studies/34921>.

**REFERENCES**

1. Topaz M, Troutman-Jordan M, MacKenzie M. Construction, Deconstruction, and Reconstruction: The Roots of Successful Aging Theories. *Nurs Sci Q*. 2014;27(3):226-233.
2. Zubritsky C, Abbott KM, Hirschman KB, Bowles KH, Foust JB, Naylor MD. Health-related quality of life: expanding a conceptual framework to include older adults who receive long-term services and supports. *Gerontologist*. 2013;53(2):205-210.
3. Haraldstad K, Rohde G, Stea TH, et al. Changes in health-related quality of life in elderly men after 12 weeks of strength training. *Eur Rev Aging Phys Act*. 2017;14:8.
4. Chambers LA, Wilson MG, Rueda S, et al. Evidence informing the intersection of HIV, aging and health: a scoping review. *AIDS Behav*. 2014;18(4):661-675.
5. Lim JW, Gonzalez P, Wang-Letzkus MF, Ashing-Giwa KT. Understanding the cultural health belief model influencing health behaviors and health-related quality of life between Latina and Asian-American breast cancer survivors. *Support Care Cancer*. 2009;17(9):1137-1147.
6. Banerjee S. Multimorbidity—older adults need health care that can count past one. *The Lancet*. 2015;385(9968):587-589.
7. Lopez-Otin C, Blasco MA, Partridge L, Serrano M, Kroemer G. The hallmarks of aging. *Cell*. 2013;153(6):1194-1217.
8. Cherepanov D, Palta M, Fryback DG, Robert SA. Gender differences in health-related quality-of-life are partly explained by sociodemographic and socioeconomic variation between adult men and women in the US: evidence from four US nationally representative data sets. *Qual Life Res*. 2010;19(8):1115-1124.
9. Michalos AC. Social Indicators Research and Health-Related Quality of Life Research. *Connecting the Quality of Life Theory to Health, Well-being and Education: The Selected Works of Alex C. Michalos*. Cham: Springer International Publishing; 2017:25-58.



10. Steptoe A, Deaton A, Stone AA. Subjective wellbeing, health, and ageing. *The Lancet*. 2015;385(9968):640-648.
11. Sousa KH, Kwok OM. Putting Wilson and Cleary to the test: analysis of a HRQOL conceptual model using structural equation modeling. *Qual Life Res*. 2006;15(4):725-737.
12. Waite LJ, Laumann EO, Das A, Schumm LP. Sexuality: measures of partnerships, practices, attitudes, and problems in the National Social Life, Health, and Aging Study. *J Gerontol B Psychol Sci Soc Sci*. 2009;64 Suppl 1:i56-66.
13. Rodriguez AM, Mayo NE, Gagnon B. Independent contributors to overall quality of life in people with advanced cancer. *Br J Cancer*. 2013;108(9):1790-1800.
14. Schildcrout JS, Basford MA, Pulley JM, et al. An analytical approach to characterize morbidity profile dissimilarity between distinct cohorts using electronic medical records. *J Biomed Inform*. 2010;43(6):914-923.
15. Shiu AT, Choi KC, Lee DT, Yu DS, Man Ng W. Application of a health-related quality of life conceptual model in community-dwelling older Chinese people with diabetes to understand the relationships among clinical and psychological outcomes. *J Diabetes Investig*. 2014;5(6):677-686.
16. Rizzo VM, Kintner E. Understanding the impact of racial self-identification on perceptions of health-related quality of life: a multi-group analysis. *Qual Life Res*. 2013;22(8):2105-2112.
17. Chen Y, Feeley TH. Social support, social strain, loneliness, and well-being among older adults. *Journal of Social and Personal Relationships*. 2013;31(2):141-161.
18. Shiovitz-Ezra S, Leitsch S. The Role of Social Relationships in Predicting Loneliness: The National Social Life, Health, and Aging Project. *Social Work Research*. 34(3):157-167.
19. Rogers A, Brooks H, Vassilev I, Kennedy A, Blickem C, Reeves D. Why less may be more: a mixed methods study of the work and relatedness of 'weak ties' in supporting long-term condition self-management. *Implement Sci*. 2014;9:19.
20. Gesell SB, Barkin SL, Valente TW. Social network diagnostics: a tool for monitoring group interventions. *Implement Sci*. 2013;8:116.
21. Crookes DM, Shelton RC, Tehranifar P, et al. Social networks and social support for healthy eating among Latina breast cancer survivors: implications for social and behavioral interventions. *J Cancer Surviv*. 2015.
22. Uchino BN, Ruiz JM, Smith TW, et al. The Strength of Family Ties: Perceptions of Network Relationship Quality and Levels of C-Reactive Proteins in the North Texas Heart Study. *Ann Behav Med*. 2015;49(5):776-781.
23. Druss BG, Zhao L, von Esenwein SA, et al. The Health and Recovery Peer (HARP) Program: a peer-led intervention to improve medical self-management for persons with serious mental illness. *Schizophr Res*. 2010;118(1-3):264-270.
24. Brito K, Edirimanne S, Eslick GD. The extent of improvement of health-related quality of life as assessed by the SF36 and PASEIKA scales after parathyroidectomy in patients with primary hyperparathyroidism--a systematic review and meta-analysis. *Int J Surg*. 2015;13:245-249.
25. Bekelman DB, Hooker S, Nowels CT, et al. Feasibility and acceptability of a collaborative care intervention to improve symptoms and quality of life in chronic heart failure: mixed methods pilot trial. *J Palliat Med*. 2014;17(2):145-151.
26. Chan R, Brooks R, Erlich J, et al. How do clinical and psychological variables relate to quality of life in end-stage renal disease? Validating a proximal-distal model. *Qual Life Res*. 2014;23(2):677-686.
27. Bakas T, McLennon SM, Carpenter JS, et al. Systematic review of health-related quality of life models. *Health Qual Life Outcomes*. 2012;10:134.

- 1  
2  
3 28. Phillips VL, Bonakdar Tehrani A, Langmuir H, Goode PS, Burgio KL. Treating Urge  
4 Incontinence in Older Women: A Cost-Effective Investment in Quality-Adjusted Life-Years  
5 (QALY). *Journal of Geriatrics*. 2015;2015:1-7.  
6  
7 29. Dumoulin C, Hay-Smith J, Habee-Seguin GM, Mercier J. Pelvic floor muscle training versus no  
8 treatment, or inactive control treatments, for urinary incontinence in women: a short version  
9 Cochrane systematic review with meta-analysis. *Neurol Urodyn*. 2015;34(4):300-308.  
10 30. Kirchengast S, Haslinger B. Gender Differences in Health-Related Quality of Life Among Healthy  
11 Aged and Old-Aged Austrians: Cross-Sectional Analysis *Gender Medicine*. 2008;5(3):270-278.  
12 31. Mundet L, Ribas Y, Arco S, Clave P. Quality of Life Differences in Female and Male Patients  
13 with Fecal Incontinence. *J Neurogastroenterol Motil*. 2016;22(1):94-101.  
14  
15  
16  
17  
18  
19  
20  
21  
22  
23  
24  
25  
26  
27  
28  
29  
30  
31  
32  
33  
34  
35  
36  
37  
38  
39  
40  
41  
42  
43  
44  
45  
46  
47  
48  
49  
50  
51  
52  
53  
54  
55  
56  
57  
58  
59  
60

## STROBE Statement—checklist of items that should be included in reports of observational studies

## Correlates and Etiological Factors Associated with Hedonic Well-Being Among an Aging Population of US Men and Women: secondary data analysis of a national survey

Michelle Odlum, EdD, MPH<sup>1</sup>, Nicole Davis, PhD, RN<sup>2</sup>, Otis Owens, PhD, MPH, Michael Preston, PhD, MPH<sup>4</sup>, Russell Brewer, DrPH, MPH<sup>3</sup>, and Danielle Black, MS, MPH<sup>5,1</sup>

|                           | Item No | Recommendation                                                                                                                                                                                                                                                                                                                                                                                                                                                                                                                                                                                                                                                                                                    |
|---------------------------|---------|-------------------------------------------------------------------------------------------------------------------------------------------------------------------------------------------------------------------------------------------------------------------------------------------------------------------------------------------------------------------------------------------------------------------------------------------------------------------------------------------------------------------------------------------------------------------------------------------------------------------------------------------------------------------------------------------------------------------|
| <b>Title and abstract</b> | 1       | (a) Indicate the study's design with a commonly used term in the title or the abstract <b>pages 2, 9</b><br>(b) Provide in the abstract an informative and balanced summary of what was done and what was found <b>page 2</b>                                                                                                                                                                                                                                                                                                                                                                                                                                                                                     |
| <b>Introduction</b>       |         |                                                                                                                                                                                                                                                                                                                                                                                                                                                                                                                                                                                                                                                                                                                   |
| Background/rationale      | 2       | Explain the scientific background and rationale for the investigation being reported <b>pages 3, 4</b>                                                                                                                                                                                                                                                                                                                                                                                                                                                                                                                                                                                                            |
| Objectives                | 3       | State specific objectives, including any pre-specified hypotheses <b>page 2, 3</b>                                                                                                                                                                                                                                                                                                                                                                                                                                                                                                                                                                                                                                |
| <b>Methods</b>            |         |                                                                                                                                                                                                                                                                                                                                                                                                                                                                                                                                                                                                                                                                                                                   |
| Study design              | 4       | Present key elements of study design early in the paper <b>page 3, 4</b>                                                                                                                                                                                                                                                                                                                                                                                                                                                                                                                                                                                                                                          |
| Setting                   | 5       | Describe the setting, locations, and relevant dates, including periods of recruitment, exposure, follow-up, and data collection <b>page 3, 4</b>                                                                                                                                                                                                                                                                                                                                                                                                                                                                                                                                                                  |
| Participants              | 6       | (a) <i>Cohort study</i> —Give the eligibility criteria, and the sources and methods of selection of participants. Describe methods of follow-up<br><i>Case-control study</i> —Give the eligibility criteria, and the sources and methods of case ascertainment and control selection. Give the rationale for the choice of cases and controls<br><i>Cross-sectional study</i> —Give the eligibility criteria, and the sources and methods of selection of participants <b>page 3, 4</b><br>(b) <i>Cohort study</i> —For matched studies, give matching criteria and number of exposed and unexposed<br><i>Case-control study</i> —For matched studies, give matching criteria and the number of controls per case |
| Variables                 | 7       | Clearly define all outcomes, exposures, predictors, potential confounders, and effect modifiers. Give diagnostic criteria, if applicable <b>page 4, 9</b>                                                                                                                                                                                                                                                                                                                                                                                                                                                                                                                                                         |
| Data sources/measurement  | 8*      | For each variable of interest, give sources of data and details of methods of assessment (measurement). Describe comparability of assessment methods if there is more than one group <b>page 4</b>                                                                                                                                                                                                                                                                                                                                                                                                                                                                                                                |
| Bias                      | 9       | Describe any efforts to address potential sources of bias <b>N/A</b>                                                                                                                                                                                                                                                                                                                                                                                                                                                                                                                                                                                                                                              |
| Study size                | 10      | Explain how the study size was arrived at <b>page 4</b>                                                                                                                                                                                                                                                                                                                                                                                                                                                                                                                                                                                                                                                           |
| Quantitative variables    | 11      | Explain how quantitative variables were handled in the analyses. If applicable, describe which groupings were chosen and why <b>page 4, 5</b>                                                                                                                                                                                                                                                                                                                                                                                                                                                                                                                                                                     |
| Statistical methods       | 12      | (a) Describe all statistical methods, including those used to control for confounding <b>page 5</b><br>(b) Describe any methods used to examine subgroups and interactions <b>page 5</b><br>(c) Explain how missing data were addressed <b>N/A</b>                                                                                                                                                                                                                                                                                                                                                                                                                                                                |



1  
2 (d) *Cohort study*—If applicable, explain how loss to follow-up was addressed

3 *Case-control study*—If applicable, explain how matching of cases and controls was  
4 addressed

5 *Cross-sectional study*—If applicable, describe analytical methods taking account of  
6 sampling strategy **N/A**

---

7  
8 (e) Describe any sensitivity analyses

9 Continued on next page

10  
11  
12  
13  
14  
15  
16  
17  
18  
19  
20  
21  
22  
23  
24  
25  
26  
27  
28  
29  
30  
31  
32  
33  
34  
35  
36  
37  
38  
39  
40  
41  
42  
43  
44  
45  
46  
47  
48  
49  
50  
51  
52  
53  
54  
55  
56  
57  
58  
59  
60

For peer review only

1  
2  
3  
4  
5  
6  
7  
8  
9  
10  
11  
12  
13  
14  
15  
16  
17  
18  
19  
20  
21  
22  
23  
24  
25  
26  
27  
28  
29  
30  
31  
32  
33  
34  
35  
36  
37  
38  
39  
40  
41  
42  
43  
44  
45  
46  
47  
48  
49  
50  
51  
52  
53  
54  
55  
56  
57  
58  
59  
60**Results**

|                  |     |                                                                                                                                                                                                                                                                                                                                                                                                                                           |
|------------------|-----|-------------------------------------------------------------------------------------------------------------------------------------------------------------------------------------------------------------------------------------------------------------------------------------------------------------------------------------------------------------------------------------------------------------------------------------------|
| Participants     | 13* | (a) Report numbers of individuals at each stage of study—eg numbers potentially eligible, examined for eligibility, confirmed eligible, included in the study, completing follow-up, and analysed <b>page 4</b><br>(b) Give reasons for non-participation at each stage <b>N/A</b><br>(c) Consider use of a flow diagram <b>N/A</b>                                                                                                       |
| Descriptive data | 14* | (a) Give characteristics of study participants (eg demographic, clinical, social) and information on exposures and potential confounders <b>page 4, 6</b><br>(b) Indicate number of participants with missing data for each variable of interest <b>N/A</b><br>(c) <i>Cohort study</i> —Summarise follow-up time (eg, average and total amount)                                                                                           |
| Outcome data     | 15* | <i>Cohort study</i> —Report numbers of outcome events or summary measures over time<br><i>Case-control study</i> —Report numbers in each exposure category, or summary measures of exposure<br><i>Cross-sectional study</i> —Report numbers of outcome events or summary measures <b>page 6-8</b>                                                                                                                                         |
| Main results     | 16  | (a) Give unadjusted estimates and, if applicable, confounder-adjusted estimates and their precision (eg, 95% confidence interval). Make clear which confounders were adjusted for and why they were included <b>page 5, 7</b><br>(b) Report category boundaries when continuous variables were categorized <b>N/A</b><br>(c) If relevant, consider translating estimates of relative risk into absolute risk for a meaningful time period |
| Other analyses   | 17  | Report other analyses done—eg analyses of subgroups and interactions, and sensitivity analyses <b>page 5</b>                                                                                                                                                                                                                                                                                                                              |

**Discussion**

|                  |    |                                                                                                                                                                                             |
|------------------|----|---------------------------------------------------------------------------------------------------------------------------------------------------------------------------------------------|
| Key results      | 18 | Summarise key results with reference to study objectives <b>page 6-8</b>                                                                                                                    |
| Limitations      | 19 | Discuss limitations of the study, taking into account sources of potential bias or imprecision. Discuss both direction and magnitude of any potential bias <b>page 9</b>                    |
| Interpretation   | 20 | Give a cautious overall interpretation of results considering objectives, limitations, multiplicity of analyses, results from similar studies, and other relevant evidence <b>page 8, 9</b> |
| Generalisability | 21 | Discuss the generalisability (external validity) of the study results <b>page 8, 9</b>                                                                                                      |

**Other information**

|         |    |                                                                                                                                                                              |
|---------|----|------------------------------------------------------------------------------------------------------------------------------------------------------------------------------|
| Funding | 22 | Give the source of funding and the role of the funders for the present study and, if applicable, for the original study on which the present article is based <b>page 10</b> |
|---------|----|------------------------------------------------------------------------------------------------------------------------------------------------------------------------------|

\*Give information separately for cases and controls in case-control studies and, if applicable, for exposed and unexposed groups in cohort and cross-sectional studies.

**Note:** An Explanation and Elaboration article discusses each checklist item and gives methodological background and published examples of transparent reporting. The STROBE checklist is best used in conjunction with this article (freely available on the Web sites of PLoS Medicine at <http://www.plosmedicine.org/>, Annals of Internal Medicine at <http://www.annals.org/>, and Epidemiology at <http://www.epidem.com/>). Information on the STROBE Initiative is available at [www.strobe-statement.org](http://www.strobe-statement.org).

# BMJ Open

## Correlates and Etiological Factors Associated with Hedonic Well-Being Among an Aging Population of US Men and Women: secondary data analysis of a national survey

|                                 |                                                                                                                                                                                                                                                                                                                                                                     |
|---------------------------------|---------------------------------------------------------------------------------------------------------------------------------------------------------------------------------------------------------------------------------------------------------------------------------------------------------------------------------------------------------------------|
| Journal:                        | <i>BMJ Open</i>                                                                                                                                                                                                                                                                                                                                                     |
| Manuscript ID                   | bmjopen-2017-020962.R1                                                                                                                                                                                                                                                                                                                                              |
| Article Type:                   | Research                                                                                                                                                                                                                                                                                                                                                            |
| Date Submitted by the Author:   | 16-Apr-2018                                                                                                                                                                                                                                                                                                                                                         |
| Complete List of Authors:       | Odlum, Michelle; Columbia University, School of Nursing<br>Davis, Nicole; Clemson University School of Nursing<br>Owens, Otis; University of South Carolina College of Social Work<br>Preston, Michael; University of Arkansas for Medical Sciences<br>Brewer, Russell; Louisiana Public Health Institute<br>Black, Danielle; Columbia University School of Nursing |
| <b>Primary Subject Heading</b>: | Geriatric medicine                                                                                                                                                                                                                                                                                                                                                  |
| Secondary Subject Heading:      | Mental health, Patient-centred medicine, Sociology                                                                                                                                                                                                                                                                                                                  |
| Keywords:                       | Aging, Well-being, Gender differences, Health-related Quality of Life                                                                                                                                                                                                                                                                                               |
|                                 |                                                                                                                                                                                                                                                                                                                                                                     |

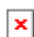

1  
2  
3 Correlates and Etiological Factors Associated with Hedonic Well-Being Among an Aging Population of US Men  
4 and Women: secondary data analysis of a national survey  
5

6 Michelle Odlum, EdD, MPH<sup>1</sup>, Nicole Davis, PhD, RN<sup>2</sup>, Otis Owens, PhD, MPH, Michael Preston, PhD, MPH<sup>4</sup>,  
7 Russell Brewer, DrPH, MPH<sup>3</sup>, and Danielle Black, MS, MPH<sup>5,1</sup>  
8

9 <sup>1</sup>Columbia University School of Nursing

10 <sup>2</sup>Clemson University School of Nursing

11 <sup>3</sup>University of South Carolina College of Social Work

12 <sup>4</sup>University of Arkansas for Medical Sciences

13 <sup>5</sup>Louisiana Public Health Institute

14 <sup>5</sup>Columbia University Mailman School of Public Health  
15  
16  
17

18 Corresponding Author: Michelle Odlum mlo12@columbia.edu 242 W 112<sup>th</sup> Street 5C New York, NY 10026  
19

20 **Author, addresses and affiliations:**

21  
22 Michelle Odlum, EdD, MPH  
23 Assistant Professor of Nursing  
24 Columbia University  
25 School of Nursing  
26 560 W 168 Street  
27 New York, NY, 10032  
28 347-806-2090  
29

30  
31 Nicole Davis, PhD, RN  
32 Assistant Professor of Nursing  
33 Clemson University  
34 School of Nursing  
35 University Center of Greenville  
36 225 S. Pleasantburg Drive, Suite B-5  
37 Greenville, SC 29607  
38 770-639-1501  
39

40  
41 Otis Owens, PhD, MPH  
42 Assistant Professor  
43 University of South Carolina  
44 College of Social Work  
45 1512 Pendleton St.  
46 Columbia, SC 29208  
47 901-218-2852

48  
49 Michael Preston, PhD, MPH  
50 Assistant Professor  
51 University of Arkansas for Medical Sciences  
52 4301 W Markham St  
53 Little Rock, AR 72205  
54 501-526-7101  
55  
56  
57  
58  
59  
60

Russell Brewer, DrPH, MPH  
Director, HIV and STI Portfolio  
Louisiana Public Health Institute  
1515 Poydras, Suite 1200  
New Orleans, LA 70112  
504-301-9825

Danielle Black, MA, MPH  
Graduate Research Assistant  
Columbia University  
School of Nursing  
617 W 168 Street  
New York, NY, 10032  
910-547-4907

## ABSTRACT

**Objective.** To understand the gender-specific factors that uniquely contribute to successful aging in a US population of men and women, 57-85 years of age. This was achieved through the examination of the correlates of subjective well-being defined by health-related quality of life (HRQoL), across several biological and psychosocial determinants of health.

**Design.** Cross sectional study

**Setting.** The NSHAP (National Social Life, Health and Ageing Project, 2010-11) a representative sample of the US population.

**Participants.** 3,377 adults aged 57 to 85 (1538 men, 1839 women) from the NSHAP.

**Main outcome measures.** The bio-psychosocial factors of Biological/Physiological Function, Symptom Status, Functional Status, General Health Perceptions and HRQoL-happiness.

**Method.** HRQoL was measured using the NSHAP Wave 2 multistage, stratified area probability sample of US households (N=3,377). Variable selection was guided by the Wilson's and Cleary's Model (WCM) that classifies health outcomes at five main levels and characteristics.

**Results.** Our findings indicate differences in bio-psychosocial factors comprised in the WCM and their relative importance and unique impact on HRQoL by gender. Women reported significantly lower HRQoL than men ( $t=3.5$ ,  $df=3366$ ). The most significant contributors to HRQoL in women were mental health ( $B=0.31$ ; 0.22, 0.39), loneliness ( $B=-0.26$ ; -0.35, -0.17), urinary incontinence ( $B=-0.22$ ; -0.40, -0.05) and support from spouse/partner ( $B=0.27$ ; 0.10, 0.43), and family ( $B=0.12$ ; 0.03, 0.20). Men indicated mental health ( $B=0.21$ ; 0.14, 0.29), physical health ( $B=0.17$ ; 0.10, 0.23), functional difficulties ( $B=0.38$ ; 0.10, 0.65), loneliness ( $B=-0.20$ ; -0.26, -0.12), depression ( $B=-0.36$ ; -0.58, -0.15) and support from friends ( $B=0.06$ ; 0.10, 0.11) as significant contributors. Those with greater social support had better HRQoL ( $F=4.22$ ,  $df=4$ ). Lack of companionship and reliance on spouse/partner were significant HRQoL contributors in both groups.

**Conclusion.** Our findings offer insight into aging, gender and subjective well-being. The results provided an opportunity to identify bio-psychosocial factors to inform interventions to support successful aging.

### Article Summary: Strengths and limitations of this study

- A variety of bio-psychosocial factors that contribute to well-being by gender were compared, where prior studies have not used gender as an independent variable.
- Effect sizes were used to summarize our regression analyses for a manageable and clinically interpretable picture of the unique contribution of gender across the comprehensive Wilson Cleary Model's (WCM), linking bio-psychosocial factors to overall well-being defined as Health Related Quality of Life - happiness.
- We were unable to establishing a cause-effect relationship or to determine changes in perceptions over time based on our cross-sectional analysis.
- We were limited to define the WCM levels based on variables in the NSHAP; yet with the variety of indicators captured in the NSHAP, this was a minor limitation.
- Beyond identified limitations, results mirrored prior research and contributed to the understanding of HRQoL gender-based differences, while controlling for potential confounders including age, race/ethnicity and socioeconomic status.

## INTRODUCTION

Successful aging was traditionally defined as the absence of disease and associated functional limitations.<sup>1</sup> However, the definition has shifted to a multidimensional view that accounts for psychosocial and cultural aspects of health and health related quality of life (HRQoL).<sup>1,2</sup> This shift in definition is driven by patient center care, patient empowerment and shared decision making with providers in the healthcare setting.<sup>2</sup> In fact, HRQoL is now viewed as an important complement to biomedical measures of health.<sup>3</sup> An important indicator of successful aging is subjective well-being, an aspect of HRQoL. Subjective well-being, is a direct predictor of health outcomes affecting biological, physical, and psychosocial changes in older adults.<sup>4,5</sup> Improvements in population-level well-being is an aspiration of society, sparking policy and economic debates.<sup>6</sup> Studies of life satisfaction have shown that subjective well-being is affected by a multitude of additional factors, including social and familial relationships. These additional factors may be protective, potentially decreasing or eliminating the chronic disease and symptom burden.<sup>6</sup>

Three approaches exist to capture subjective well-being; these are life evaluation (e.g., life satisfaction); hedonic well-being (e.g., experienced happiness, anger); and eudemonic well-being (e.g., life meaning and purpose).<sup>6</sup> Researchers suggest subjective well-being as a measure for healthcare resources allocation. Therefore, the need exists to further identify and understand the factors associated with successful aging.<sup>2,7</sup> It is also essential to compare these factors between men and women to determine the unique contribution of gender.<sup>2</sup> Evidence to date remains unclear as prior studies of gender differences have focused on specific chronic diseases or on socioeconomic and demographic factors, usually controlling for gender as a potential confounder and not as an independent variable.<sup>8</sup> Therefore, we sought to identify the correlates and etiological factors associated with hedonic well-being, specifically feelings of happiness, through a bio-psychosocial lens, accounting for gender variability, in an aging population of US adults. Happiness, served as a proxy for HRQoL. It is a measure of life satisfaction, the absence or presence of desirable or undesirable feelings or experiences. It is proven useful in the analysis of HRQoL.<sup>9</sup>

Guided by the Wilson's and Cleary's Conceptual Model (WCM), Figure 1 we analyzed the National Social Life, Health and Aging Project (NSHAP), second wave data. We examined whether objective (e.g., biological/physiological) and self-perceived measures (e.g., functional status) of health explain gender differences in HRQoL (i.e., happiness). Self-rated perceptions of health have been observed to correlate with other health indicators including morbidity.<sup>10</sup> We determined the best models predicting the HRQoL of male and female US adults ages 57 to 85.<sup>11</sup> We explored the extent to which the WCM levels interact to predict HRQoL and provide greater insight into aging. The bio-psychosocial WCM was selected for our analysis as it considers health outcomes on a continuum of increasing complexity and health trajectories associated with aging. It is also shown to enhance knowledge about HRQoL in diverse populations.<sup>11</sup> The model classifies health outcomes at five main levels.<sup>11</sup> The first level Biological/Physiological function, examines the individual as a whole. Symptoms (level 2), are the perceptions of physical, emotional, and cognitive states. Symptoms are considered significant determinants of Functional Status (level 3), with biological and symptom variables evidenced to be correlated with Functional Status. General Health Perceptions (level 4) are subjective appraisals of health and Overall Quality of Life (level 5) as a whole.<sup>11</sup> Variables that comprise each level interact in complex ways to determine HRQoL. Arrows linking the five main levels indicate dominant causal relationships. In addition, the five main levels are influenced by individual (e.g., age, education) and environmental characteristics (e.g., social support).<sup>11</sup> Studies of hedonic states, including happiness, have predicted morbidity and mortality. However, confounding factors indicate that well-being is coupled with additional factors such as education.<sup>10</sup> The WCM controls for potential confounding. Additionally, different than prior studies that compared the quantified HRQoL scores across gender, we identified the hierarchical differences of each WCM level and their weighted contribution to HRQoL (happiness).

## METHODS

**Participants.** The second wave of the NSHAP survey, a National sample of US adults ages 57 to 85, was utilized in our analysis, was conducted from 2010-2011.<sup>12</sup> The survey focused on exploring interpersonal connections and overall health outcomes as they relate to: culture, gender and socioeconomic status; health behaviors; health care utilization, social support, and well-being.<sup>12</sup> Our current study utilized Wave 2 data to explore the relationship between the WCM constructs for both men and women. Wave 2, with its large sample size (N=3,377) and strong methodology, allowed us to systematically investigate important aspects of HRQoL and aging.

**Measures.** NSHAP variables used in our analysis were selected based on best fit with the WCM constructs. Thirty one variables were selected. We categorized the five main levels and characteristics of the WCM under two overarching categories of Objective and Subjective health indicators, Figure 1. The Objective indicators of the first main level of Biological/Physiological Function were, categorical: Body Mass Index (BMI), and continuous: average pulse rate, and average blood pressure (systolic and diastolic). The last four main levels of the WCM comprised Subjective health indicators. These included the assessment of participant perceptions of health outcomes on both individual and societal levels. Variables that comprised Symptom Status were categorical: pain, pain level, fatigue, urinary incontinence, stool incontinence and continuous: depression, anxiety. Variables that comprised Functional Status were categorical: physical function difficulty, companionship and feeling left out or isolated and continuous: perceptions of control. Variables that comprised General Health Perceptions were continuous self-rated physical and mental health. Our continuous outcome variable of interest for HRQoL in this study was defined by hedonic well-being: self-rated happiness, asked participants thoughts and feelings about their life overall. The WCM also accounts for important individual and environment influences directly impacting objective and subjective indicators. Variables that comprise Individual Characteristics were categorical: insurance coverage, age group, education, race/ethnicity, and provider visits. Variables that comprise Environmental Characteristics were categorical: marital status, reliance on spouse, partner, relatives and friends, and number of friends.

**Statistical analysis.** The association between HRQoL (i.e., happiness) and the constructs of the WCM were examined in separate analyses for male and female participants. Descriptive statistics were conducted to characterize the sample and variable distributions. Participant characteristics were summarized with means and standard deviations for continuous variables and percentages and frequencies for categorical variables. Individual and environmental characteristics were also examined for potential confounding. Correlations were calculated to determine the relationship between the WCM construct and characteristic variables and reported HRQoL by participants. Bivariate analysis was conducted. Chi square analyses were used to assess differences in categorical variables and T-tests in continuous variables, by gender. Linear regression analyses were performed to assess the relevant importance of significantly correlated variables that potentially contribute to HRQoL. Variables with significant differences ( $p < 0.05$ ) were retained for additional analysis.

Two independent stepwise multiple regressions (i.e., men and women) were performed to identify variables as a group best associated with HRQoL. Retained variables were ranked by partial  $R^2$  order to determine their relative contribution. Effect sizes were also estimated for each retained variable with t-values corresponding to the coefficient estimates divided by the associated standard errors. To identify constructs with the most consistent associations with HRQoL, effect sizes and  $R^2$  rankings were averaged per WCM construct for men and women. Data analysis was conducted with use of SPSS 21.0. The stepwise approach allows for the prevention of bias in the selection of variables in the final model.<sup>13 14</sup>

**Patient Involvement.** As an analysis of secondary data, no participants were not involved in the development of our research questions or with the analysis of the outcome measures. Additionally, participants were not involved with the interpretation of data or the writing of our analytic findings. Dissemination of analytic findings to study participants or members of their associated communities will not be accomplished.



| <b>Table 1. Demographic Characteristics of Participants (N=3,377)</b> |          |            |
|-----------------------------------------------------------------------|----------|------------|
|                                                                       | <i>N</i> | <i>(%)</i> |
| <b>Gender</b>                                                         |          |            |
| <b>Men</b>                                                            | 1538     | 45.5       |
| 69 or Under                                                           | 585      | 38.0       |
| 70-79                                                                 | 610      | 39.7       |
| 80 or older                                                           | 343      | 22.3       |
| <b>Women</b>                                                          | 1839     | 54.5       |
| 69 or Under                                                           | 812      | 44.2       |
| 70-79                                                                 | 633      | 34.4       |
| 80 or older                                                           | 394      | 21.4       |
| <b>Race</b>                                                           |          |            |
| <b>Men</b>                                                            |          |            |
| non-Black, non-Hispanic                                               | 1147     | 74.6       |
| Black or African American                                             | 217      | 14.1       |
| non-Black Hispanics                                                   | 174      | 11.3       |
| <b>Women</b>                                                          |          |            |
| non-Black, non-Hispanic                                               | 1346     | 73.2       |
| Black or African American                                             | 300      | 16.3       |
| non-Black Hispanics                                                   | 193      | 10.5       |
| <b>Education</b>                                                      |          |            |
| <b>Men</b>                                                            |          |            |
| more than High School                                                 | 884      | 57.5       |
| High School or less                                                   | 654      | 42.5       |
| <b>Women</b>                                                          |          |            |
| more than High School                                                 | 1015     | 55.2       |
| High School or less                                                   | 824      | 44.8       |
| <b>Insurance Coverage</b>                                             |          |            |
| <b>Men</b>                                                            |          |            |
| Medicaid-Medicare                                                     | 1080     | 83.9       |
| Private                                                               | 161      | 12.5       |
| None                                                                  | 46       | 3.6        |
| <b>Women</b>                                                          |          |            |
| Medicaid-Medicare                                                     | 1227     | 79.1       |
| Private                                                               | 250      | 16.1       |
| None                                                                  | 75       | 4.8        |
| <b>Marital Status</b>                                                 |          |            |
| <b>Men</b>                                                            |          |            |
| Married                                                               | 1201     | 78.1       |
| Not currently Married                                                 | 337      | 21.9       |
| <b>Women</b>                                                          |          |            |
| Married                                                               | 1085     | 59.0       |
| Not currently Married                                                 | 754      | 41.0       |
| <b>Partnership if non-Married</b>                                     |          |            |
| <b>Men</b>                                                            |          |            |
| No                                                                    | 231      | 77.5       |
| <b>Women</b>                                                          |          |            |
| No                                                                    | 659      | 93.1       |

## RESULTS

A total of 3,377 participants were included in the analysis. The majority of participants (54.5%) were women. The largest percentage of men were in the 70-79 age group (39.7%) with the largest percentage of women in the 69 and under age group (44.2%). The sample was predominantly non-Black, non-Hispanic (73.8%, N=2493). Most participants had at least a high school education (56.2%, N=1899). More than two-thirds were married (67.7%, N=2286). Of those who indicated they were unmarried, 88.5% (N=890) were not in any romantic, intimate, or sexual partnerships. More than two-thirds had health care coverage in the form of Medicaid, Medicare, or a combination of both (81.3%, N=2307). Tables 1 and 2 provides a breakdown of the demographic characteristics and significant differences for variables that comprise the WCM constructs for men and women.

**Table 2. Independent Samples T-tests and X<sup>2</sup> for Wilson Cleary Model construct-specific variables with Men and Women (N=3,377)**

|                                          |                                      | Men        | Women      | X <sup>2</sup> /T-test | df   |
|------------------------------------------|--------------------------------------|------------|------------|------------------------|------|
| BIOLOGICAL/<br>PHYSIOLOGICAL<br>FUNCTION | BMI (normal)                         | 36.5%      | 63.5%      | 29.0**                 | 2    |
|                                          | Diastolic average                    | 79.0±12.0  | 81.0±11.5  | -6.4**                 | 3255 |
|                                          | Systolic Average                     | 138.0±20.7 | 137.0±21.0 | 1.6                    | 3255 |
|                                          | Pulse Average                        | 67.7±12.1  | 69.8±11.2  | -5.1**                 | 3035 |
| SYMPTOM STATUS                           | PAIN                                 | 43.8%      | 56.2%      | 8.9**                  | 1    |
|                                          | PAIN: level (no pain)                | 50.0%      | 50.0%      | 11.2                   | 6    |
|                                          | DEPRESSION (CESD total) <sup>1</sup> | 1.8±0.3    | 2.0±0.4    | -6.6**                 | 3312 |
|                                          | ANXIETY (HADS total) <sup>2</sup>    | 1.8±0.5    | 1.8±0.4    | -0.8                   | 2627 |
|                                          | FATIGUE                              | 54.7%      | 45.3%      | 3.1                    | 3    |
|                                          | Urinary Incontinence                 | 30.2%      | 69.8%      | 94.7**                 | 1    |
|                                          | Stool Incontinence                   | 30.4%      | 69.6%      | 15.5**                 | 1    |
| FUNCTIONAL<br>STATUS                     | PHYSICAL FUNCTION No Difficulty      | 46.1%      | 53.9%      | 27.1                   | 16   |
|                                          | Perceptions of Control               | 2.3±0.5    | 2.2±0.6    | 2.7**                  | 2665 |
|                                          | Companionship                        | 49.8%      | 50.2%      | 21.0**                 | 3    |
|                                          | Feel left Out                        | 54.0%      | 46.0%      | 3.1                    | 3    |
|                                          | Feel Isolated                        | 55.8%      | 44.2%      | 1.5                    | 3    |
| GENERAL HEALTH<br>PERCEPTIONS            | Self-rated physical health           | 3.2±1.1    | 3.2±1.0    | -0.7                   | 3370 |
|                                          | Self-rated mental health             | 3.7±1.0    | 3.6±1.0    | 3.2**                  | 3372 |
|                                          | Seen the doctor in last year         | 3.0±1.5    | 3.04±1.5   | -1.28                  | 3367 |
|                                          | Rely on spouse/partner               | 63.3%      | 36.70%     | 26.92**                | 3    |
| ENVIRONMENTAL<br>CHARACTERISTICS         | Rely on family                       | 36.9%      | 63.1%      | 42.14**                | 3    |
|                                          | Close family/relatives               | 38.6%      | 61.4%      | 52.05**                | 5    |
|                                          | Rely on friends                      | 44.3%      | 55.7%      | 71.78**                | 3    |
|                                          | Has friends                          | 44.9%      | 55.1%      | 13.12*                 | 5    |

Note. \*\*p < 0.01, \*p < 0.05; <sup>1</sup>Center for Epidemiological Studies Depression (CESD); <sup>2</sup>Hospital Anxiety and Depression Scale (HADS)

Bivariate correlation analyses were initially conducted to examine the associations between the outcome HRQoL variable and those that comprised the WCM constructs. For men, of the original 31 variables, bivariate correlation analysis led to the elimination of 6 variables, for women the elimination of seven variables. All significantly correlated variables were then screened by simple linear regression. For men, regression analysis led to the elimination of 13 variables, for women the elimination of 17 variables. HRQoL happiness scores were compared by the total scores for men, women and participants combined across the categorized age groups (69 or younger, 70-79, 80 or older). Significant results were observed across age groups for combined participants (X<sup>2</sup>=18.6, p=.017) and for women (X<sup>2</sup>=20.1, p=.010), both having significantly lower HRQoL score with increasing age.

1  
2  
3  
4  
5  
6  
7  
8  
9  
10  
11  
12  
13  
14  
15  
16  
17  
18  
19  
20  
21  
22  
23  
24  
25  
26  
27  
28  
29  
30  
31  
32  
33  
34  
35  
36  
37  
38  
39  
40  
41  
42  
43  
44  
45  
46  
47  
48  
49  
50  
51  
52  
53  
54  
55  
56  
57  
58  
59  
60**Table 3. WCM Constructs and HRQoL Outcomes (N=3,377)**

|                               | Partial R <sup>2</sup> | Partial R <sup>2</sup> Rank | Effect Size (t-value) | Average R <sup>2</sup> Ranks | Average Effect Sizes (t-values) |
|-------------------------------|------------------------|-----------------------------|-----------------------|------------------------------|---------------------------------|
| <b>MEN</b>                    |                        |                             |                       |                              |                                 |
| GENERAL HEALTH PERCEPTIONS    | 0.24, 1.8              | 1, 3                        | 8.3, 5.9              | 2                            | 7.1                             |
| FUNCTIONAL STATUS             | 0.21, .07              | 2, 6                        | 7.2, 2.2              | 4                            | 4.7                             |
| SYMPTOM STATUS                | 0.14                   | 4                           | 4.8                   | 4                            | 4.8                             |
| ENVIRONMENTAL CHARACTERISTICS | 0.09                   | 5                           | 3.0                   | 5                            | 3.0                             |
| <b>WOMEN</b>                  |                        |                             |                       |                              |                                 |
| GENERAL HEALTH PERCEPTIONS    | 0.39                   | 1                           | 9.4                   | 1                            | 9.4                             |
| FUNCTIONAL STATUS             | 0.33                   | 2                           | 7.9                   | 2                            | 7.9                             |
| SYMPTOM STATUS                | 0.03                   | 5                           | 0.68                  | 5                            | 0.68                            |
| ENVIRONMENTAL CHARACTERISTICS | 0.16, 0.12             | 3, 4                        | 3.6, 2.6              | 3.5                          | 3.09                            |

A second linear regression analysis was conducted. Partial R<sup>2</sup> were ranked from 1 (most important) to 5 (least important) for men and women separately, with significant variables identified in the second linear regression analyses. Additionally, the last two columns on Table 3 contain the average of the R<sup>2</sup> ranking and the average effect sizes. The highest ranking variable for overall HRQoL happiness for men was General Health Perceptions (self-rated: mental health and physical health), Symptom Status (CESD- Depression score) and Functional Status (Lack companionship) both ranked second based on R<sup>2</sup> ranks, with Symptom Status having a greater average effect size. Physical Function Difficulty and Environmental Characteristics (Rely on spouse/partner) were last. Our regression analyses identified variables that, in the presence of all others, make a unique and direct contribution to HRQoL happiness.<sup>10</sup> The highest ranking variable for overall HRQoL for women was General Health Perceptions (mental health), followed by Functional Status (Lack of Companionship), Environmental Characteristics (Rely on spouse/partner and Number of close family members) and Symptom Status (urinary incontinence). The hierarchy of contributing WCM constructs to overall HRQoL are ranked for men and women, Table 4.

**Table 4. Hierarchy of HRQoL Contributors based on Average Effect Sizes (N=3,377)**

| Rank         | Item Descriptions                                                                            |
|--------------|----------------------------------------------------------------------------------------------|
| <b>MEN</b>   |                                                                                              |
| 1st          | GENERAL HEALTH PERCEPTIONS<br>Self-rated: mental health and physical health                  |
| 2nd          | SYMPTOM STATUS<br>Depression                                                                 |
| 3rd          | FUNCTIONAL STATUS<br>Lack companionship, Physical Function Difficulty                        |
| 4th          | ENVIRONMENTAL CHARACTERISTICS<br>Number of close friends                                     |
| <b>WOMEN</b> |                                                                                              |
| 1st          | GENERAL HEALTH PERCEPTIONS<br>Self-rated: mental health                                      |
| 2nd          | FUNCTIONAL STATUS<br>Lack companionship<br>Rely on spouse/partner and Number of close family |
| 3rd          | ENVIRONMENTAL CHARACTERISTICS<br>members                                                     |
| 4th          | SYMPTOM STATUS<br>Urinary Incontinence                                                       |

## DISCUSSION

Understanding subjective well-being and its association with health in older adults is still in its early stages. Consequently, the extent to which a variety of bio-psychosocial factors attribute to well-being and account for gender-related differences remain unclear. To explore this further, we utilized the WCM which offers the most comprehensive view of pathways linking the most relevant bio-psychosocial variables to overall well-being defined as HRQoL happiness.<sup>2,11,15,16</sup> Epidemiologic studies of happiness have predicted long term morbidity and mortality. Previous studies have shown that subjective well-being is not universal across populations, yet Individual

Characteristics including, education and race/ethnicity, did not significantly contribute to HRQoL happiness in our population.<sup>10</sup> Our results did however, identify significant differences between men and women in the type and contribution of bio-psychosocial factors to HRQoL happiness. The overall models allowed for us to observe the interplay between various aspects of aging by gender.<sup>11</sup>

### **Mechanisms and Implications**

Women reported significantly lower HRQoL than men. Our findings also indicated a significant decrease in HRQoL as age increased for the entire sample and for women. A decrease in HRQoL was also observed for men, but the results were not significant. Previous studies have identified lower HRQoL in populations of older women. It is hypothesized that gender-related differences in HRQoL of older adults may be in their perceptions of symptoms and illness progression, with men being less focused on symptom recognition until they are severe.<sup>8</sup> Interestingly, although there were no significant differences in perceptions of physical health between men and women in our analysis, it was the greatest contributor of HRQoL in men. Similarly, the third greatest contributor to HRQoL in men was the Functional Status level factor Physical Function Difficulty, also not observed in women. Prior studies have indicated that functional difficulty generally comprise the majority of an individual's functional health status, which in our study again was only associated with men. This is an interesting finding and may be attributed to the increased likelihood of men suffering from more severe and life threatening chronic conditions than women.<sup>8</sup> Instead, women are more likely to suffer from non-life threatening diseases including autoimmune disorders.<sup>8</sup> Social support significantly contributed to HRQoL in both men and women. The lack of companionship under the Functional Status level was significant in both groups. These findings align with the literature on loneliness in older ages and its adverse effects on HRQoL.<sup>17,18</sup> The reduction of inter-generational living and greater geographic expansion, has increased the report of loneliness in populations of older adults. Loneliness directly increases the likelihood of chronic diseases and all-cause mortality.<sup>19</sup> In our sample, the number of close family members was seen a significant contributor to HRQoL for women only. Having close family members may be more important to women, with 41 percent of the female sample reported being unmarried, only 21.9 percent of men. Additionally, HRQoL scores were significantly higher for married women. For those who reported being unmarried with a romantic, intimate, or sexual partner, men were significantly higher at 22.5 percent and women at 6.9 percent. Participants who reported greater social support from partners and relatives had higher HRQoL. Unhealthy familial relationships were predictors of loneliness in a prior study, particularly for the unmarried.<sup>17,18</sup> Their findings identify family ties as the most significant contributor to loneliness.<sup>17,18</sup> This aligns with our findings as women who reported a greater number of reliable family members had significantly higher HRQoL scores. Therefore, the need exists for the consideration of social networks<sup>19,20</sup> and their impact on HRQoL in risk assessment and intervention development to improve aging-related outcomes. Previous studies have also shown that men and women who were satisfied with their family relationship had 1.8 and 3.0 times higher odds of good HRQoL, respectively. Frequent contacts and visits with friends or family motivate the participation in activities and increase HRQoL.<sup>20,21</sup>

The highest level significant contributor to HRQoL in both men and women was the General Health Perceptions level which both comprised of mental health. In fact, those who reported better mental health outcomes reported higher HRQoL. Men reported better mental health at a significantly higher level than women. Yet, depression was the only significant factor for the Symptom Status level in men alone and was the second highest contributor to their HRQoL. Other studies have shown that mental health concerns and symptoms of depression significantly impact HRQoL.<sup>2,11,22</sup> Our findings align with the literature on depression, with depression in women reported to be higher.<sup>15,23,2,11,24-27</sup> In fact, in our sample, depression scores for women were significantly higher than for men. Yet, depression was a major contributor to HRQoL only in men. Studies have shown that unmarried men have lower HRQoL compared to married men. Our findings show significantly higher depression scores for married men in our sample. Those who reported having demanding or critical spouses or did not spend much time with their spouses had significantly higher Depression scores. Though not significant in the hierarchical model, women with demanding and critical spouses also reported significantly higher depression scores. These results further reinforce our findings that relationship quality is a major contributor to HRQoL. Urinary incontinence was the only significant factor in the Symptom Status level for women. Those with urinary incontinence had significantly lower HRQoL scores. Our findings align with the literature, with recent studies indicating that women were more likely to report urinary incontinence and impaired HRQoL.<sup>28,29</sup> Additionally, pelvic organ prolapse (POP), which often

1  
2  
3 peaks for women in their seventies, include the symptoms of urinary incontinence. Studies have shown significantly  
4 impaired quality of life for women with POP over the age of 50.<sup>30</sup> Symptomatic POP is evidenced to have a  
5 tremendous impact on general health-related quality of life and similar to disabilities, it can contribute to physical  
6 immobility, pain, diminished energy, sleep disturbance, emotional instability and social isolation.<sup>30</sup> Studies have  
7 also shown that self-image is considered to be more important to women than men. In fact, in a study comparing  
8 HRQoL indicators between older men and women, a positive attitude about oneself was ranked in the top ten only  
9 for women.<sup>31,32</sup> Urinary incontinence may impact self-image, increasing the likelihood of depression and social  
10 isolation. Our findings indicate women who report urinary incontinence had significantly higher Depression scores;  
11 consistent with the higher likelihood of Depression and anxiety disorders in women compared to men.<sup>8</sup>  
12

### 13 **Strengths and limitations**

14 Our analysis was based on a cross-sectional, single wave (Wave 2) of the NSHAP data and does not allow for  
15 establishing a cause-effect relationship or the determination of changes in perceptions over time. Our analysis is  
16 also limited to define the WCM levels based on variables included in the NSHAP, a limitation inherent to  
17 secondary data analysis. However, with the variety of indicators that comprise the NSHAP, this was a minor  
18 limitation.  
19

20  
21 Variables that may indirectly impact HRQoL are not identified, yet our analytic approach provides a minimum  
22 collection of variables necessary to begin the development of structural equation models to observe directional  
23 relationships. In fact, our regression approach identified the variables that make a distinct and direct contribution to  
24 HRQoL; was measured with one item of self-reported happiness in the NSHAP. Our single item analysis may be  
25 considered less sensitive than the use of other HRQoL measures or validated tools. Yet, beyond the identified  
26 limitations, our study findings mirrored and reinforce prior research and further contributed to understanding  
27 HRQoL differences between older men and women while adjusting for confounders including age, race/ethnicity  
28 and socioeconomic status.  
29

### 30 **Conclusions and implications**

31 The current analysis provides additional evidence to support insight into subjective well-being as it relates to  
32 successful aging. The findings of our analysis enhances our understanding of the bio-psychosocial factors that  
33 impact the HRQoL of older men and women. Our results add to the literature on successful aging in addition to the  
34 utility of the WCM in understanding the impact of HRQoL based on a variety of associated factors that comprise  
35 the models levels. We observed both similarities and differences between men and women based on the levels that  
36 best contribute to HRQoL. Further investigation is needed to determine the causal factors of the identified  
37 relationships between WCM levels and HRQoL. Other indicators of subjective well-being (e.g., life evaluations and  
38 eudemonic well-being) must also be assessed for collaborative care informed by mental and physical health.<sup>10</sup> In  
39 addition to informing the development of effective interventions to improve well-being independent of morbidity,  
40 income and other aging related factors that have adversely contributed to poor health outcomes.  
41  
42

### 43 **Contributors:**

44 The first author (MO) designed the work and analyzed the data. All authors assisted substantially in the data  
45 interpretation (MO, ND, OO, MP, RB), manuscript drafting (MO), revising for important intellectual content (MO,  
46 ND, OO, MP, RB, DB), final manuscript approval (MO, ND, OO, MP, RB, DB) and agreed accountability for all  
47 aspects of this work (MO, ND, OO, MP, RB, DB).  
48

49  
50 **Funding:** The National Social Life, Health and Aging Project is supported by the National Institute on Aging of the  
51 National Institutes of Health (R37AG030481; R01AG033903). The content is the responsibility of the authors and  
52 does not necessarily represent the official views of the National Institutes of Health.  
53

54 **Competing Interests:** Authors have completed the Unified Competing Interest form at  
55 [http://www.icmje.org/coi\\_disclosure.pdf](http://www.icmje.org/coi_disclosure.pdf) (available upon request from the corresponding author) and declare that  
56 (1) our authors had no involvement with any company in the submission of this work; (2) our authors have no  
57 relationships with any companies that might may be interested in the work that has been submitted in the previous 3  
58  
59



years; (3) our authors spouses, partners, or children have no financial relationships relevant to the work that has been submitted; and (4) our authors have no non-financial interests relevant to the work that has been submitted.

**Ethical approval:** The NSHAP data analysis was carried out with de-identified, unrestricted Wave 2 Public Use File v1 designed for public dissemination. This dataset is appropriate for preliminary analyses and for the exploration of health and functioning of older American adults.

**Data sharing:** Wave 2 Public Use File v1 data for the National Social Life Health and Aging Project are available at <http://www.icpsr.umich.edu/icpsrweb/NACDA/studies/34921>.

## REFERENCES

1. Topaz M, Troutman-Jordan M, MacKenzie M. Construction, Deconstruction, and Reconstruction: The Roots of Successful Aging Theories. *Nurs Sci Q*. 2014;27(3):226-233.
2. Zubritsky C, Abbott KM, Hirschman KB, Bowles KH, Foust JB, Naylor MD. Health-related quality of life: expanding a conceptual framework to include older adults who receive long-term services and supports. *Gerontologist*. 2013;53(2):205-210.
3. Haraldstad K, Rohde G, Stea TH, et al. Changes in health-related quality of life in elderly men after 12 weeks of strength training. *Eur Rev Aging Phys Act*. 2017;14:8.
4. Chambers LA, Wilson MG, Rueda S, et al. Evidence informing the intersection of HIV, aging and health: a scoping review. *AIDS Behav*. 2014;18(4):661-675.
5. Lim JW, Gonzalez P, Wang-Letzkus MF, Ashing-Giwa KT. Understanding the cultural health belief model influencing health behaviors and health-related quality of life between Latina and Asian-American breast cancer survivors. *Support Care Cancer*. 2009;17(9):1137-1147.
6. Banerjee S. Multimorbidity—older adults need health care that can count past one. *The Lancet*. 2015;385(9968):587-589.
7. Lopez-Otin C, Blasco MA, Partridge L, Serrano M, Kroemer G. The hallmarks of aging. *Cell*. 2013;153(6):1194-1217.
8. Cherepanov D, Palta M, Fryback DG, Robert SA. Gender differences in health-related quality-of-life are partly explained by sociodemographic and socioeconomic variation between adult men and women in the US: evidence from four US nationally representative data sets. *Qual Life Res*. 2010;19(8):1115-1124.
9. Michalos AC. Social Indicators Research and Health-Related Quality of Life Research. In: *Connecting the Quality of Life Theory to Health, Well-being and Education: The Selected Works of Alex C. Michalos*. Cham: Springer International Publishing; 2017:25-58.
10. Steptoe A, Deaton A, Stone AA. Subjective wellbeing, health, and ageing. *The Lancet*. 2015;385(9968):640-648.
11. Sousa KH, Kwok OM. Putting Wilson and Cleary to the test: analysis of a HRQOL conceptual model using structural equation modeling. *Qual Life Res*. 2006;15(4):725-737.
12. Waite LJ, Laumann EO, Das A, Schumm LP. Sexuality: measures of partnerships, practices, attitudes, and problems in the National Social Life, Health, and Aging Study. *J Gerontol B Psychol Sci Soc Sci*. 2009;64 Suppl 1:i56-66.
13. Rodriguez AM, Mayo NE, Gagnon B. Independent contributors to overall quality of life in people with advanced cancer. *Br J Cancer*. 2013;108(9):1790-1800.
14. Schildcrout JS, Basford MA, Pulley JM, et al. An analytical approach to characterize morbidity profile dissimilarity between distinct cohorts using electronic medical records. *J Biomed Inform*. 2010;43(6):914-923.

15. Shiu AT, Choi KC, Lee DT, Yu DS, Man Ng W. Application of a health-related quality of life conceptual model in community-dwelling older Chinese people with diabetes to understand the relationships among clinical and psychological outcomes. *J Diabetes Investig.* 2014;5(6):677-686.
16. Rizzo VM, Kintner E. Understanding the impact of racial self-identification on perceptions of health-related quality of life: a multi-group analysis. *Qual Life Res.* 2013;22(8):2105-2112.
17. Chen Y, Feeley TH. Social support, social strain, loneliness, and well-being among older adults. *Journal of Social and Personal Relationships.* 2013;31(2):141-161.
18. Shiovitz-Ezra S, Leitsch S. The Role of Social Relationships in Predicting Loneliness: The National Social Life, Health, and Aging Project. *Social Work Research.* 34(3):157-167.
19. Crookes DM, Shelton RC, Tehranifar P, et al. Social networks and social support for healthy eating among Latina breast cancer survivors: implications for social and behavioral interventions. *J Cancer Surviv.* 2015.
20. Rogers A, Brooks H, Vassilev I, Kennedy A, Blickem C, Reeves D. Why less may be more: a mixed methods study of the work and relatedness of 'weak ties' in supporting long-term condition self-management. *Implement Sci.* 2014;9:19.
21. Gesell SB, Barkin SL, Valente TW. Social network diagnostics: a tool for monitoring group interventions. *Implement Sci.* 2013;8:116.
22. Uchino BN, Ruiz JM, Smith TW, et al. The Strength of Family Ties: Perceptions of Network Relationship Quality and Levels of C-Reactive Proteins in the North Texas Heart Study. *Ann Behav Med.* 2015;49(5):776-781.
23. Druss BG, Zhao L, von Esenwein SA, et al. The Health and Recovery Peer (HARP) Program: a peer-led intervention to improve medical self-management for persons with serious mental illness. *Schizophr Res.* 2010;118(1-3):264-270.
24. Brito K, Edirimanne S, Eslick GD. The extent of improvement of health-related quality of life as assessed by the SF36 and PASEIKA scales after parathyroidectomy in patients with primary hyperparathyroidism--a systematic review and meta-analysis. *Int J Surg.* 2015;13:245-249.
25. Bekelman DB, Hooker S, Nowels CT, et al. Feasibility and acceptability of a collaborative care intervention to improve symptoms and quality of life in chronic heart failure: mixed methods pilot trial. *J Palliat Med.* 2014;17(2):145-151.
26. Chan R, Brooks R, Erlich J, et al. How do clinical and psychological variables relate to quality of life in end-stage renal disease? Validating a proximal-distal model. *Qual Life Res.* 2014;23(2):677-686.
27. Bakas T, McLennon SM, Carpenter JS, et al. Systematic review of health-related quality of life models. *Health Qual Life Outcomes.* 2012;10:134.
28. Phillips VL, Bonakdar Tehrani A, Langmuir H, Goode PS, Burgio KL. Treating Urge Incontinence in Older Women: A Cost-Effective Investment in Quality-Adjusted Life-Years (QALY). *Journal of Geriatrics.* 2015;2015:1-7.
29. Dumoulin C, Hay-Smith J, Habee-Seguin GM, Mercier J. Pelvic floor muscle training versus no treatment, or inactive control treatments, for urinary incontinence in women: a short version Cochrane systematic review with meta-analysis. *Neurourol Urodyn.* 2015;34(4):300-308.
30. X. F, N. V, M. Z, G. B, V. R. Symptomatic Pelvic Organ Prolapse at Midlife, Quality of Life, and Risk Factors. *Obstetrics & Gynecology.* 113(3):609-616.
31. Kirchengast S, Haslinger B. Gender Differences in Health-Related Quality of Life Among Healthy Aged and Old-Aged Austrians: Cross-Sectional Analysis *Gender Medicine.* 2008;5(3):270-278.
32. Mundet L, Ribas Y, Arco S, Clave P. Quality of Life Differences in Female and Male Patients with Fecal Incontinence. *J Neurogastroenterol Motil.* 2016;22(1):94-101.



Figure 1. Operationalized Wilson Cleary Model with study-specific bio-psychosocial measures

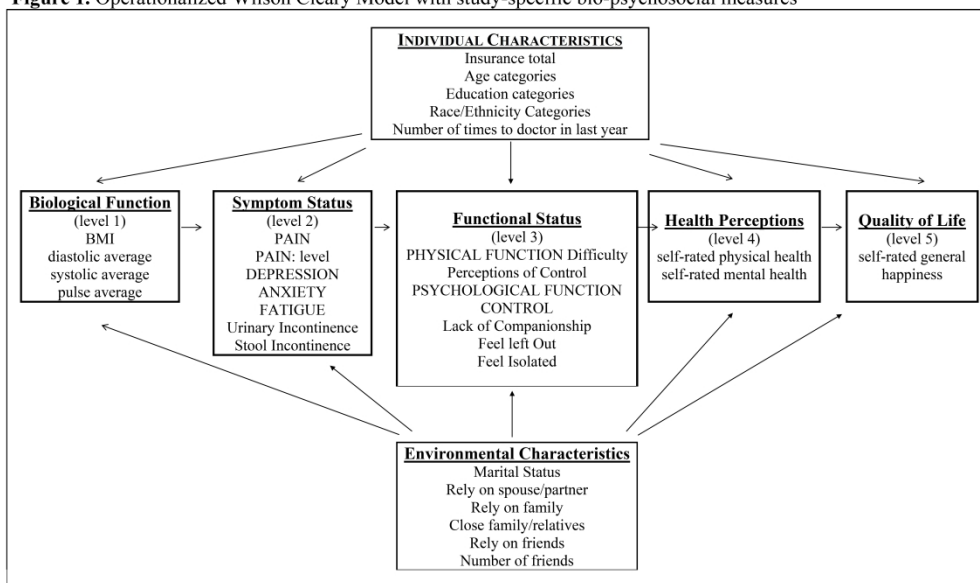

Figure 1. Operationalized Wilson Cleary Model with study-specific bio-psychosocial measures

603x365mm (300 x 300 DPI)

## STROBE Statement—checklist of items that should be included in reports of observational studies

## Correlates and Etiological Factors Associated with Hedonic Well-Being Among an Aging Population of US Men and Women: secondary data analysis of a national survey

Michelle Odlum, EdD, MPH<sup>1</sup>, Nicole Davis, PhD, RN<sup>2</sup>, Otis Owens, PhD, MPH, Michael Preston, PhD, MPH<sup>4</sup>, Russell Brewer, DrPH, MPH<sup>3</sup>, and Danielle Black, MS, MPH<sup>5,1</sup>

|                              | Item No | Recommendation                                                                                                                                                                                                                                                                                                                                                                                                                                                                                                                                                                                                                                                                                                    |
|------------------------------|---------|-------------------------------------------------------------------------------------------------------------------------------------------------------------------------------------------------------------------------------------------------------------------------------------------------------------------------------------------------------------------------------------------------------------------------------------------------------------------------------------------------------------------------------------------------------------------------------------------------------------------------------------------------------------------------------------------------------------------|
| <b>Title and abstract</b>    | 1       | (a) Indicate the study's design with a commonly used term in the title or the abstract <b>pages 2, 9</b><br>(b) Provide in the abstract an informative and balanced summary of what was done and what was found <b>page 2</b>                                                                                                                                                                                                                                                                                                                                                                                                                                                                                     |
| <b>Introduction</b>          |         |                                                                                                                                                                                                                                                                                                                                                                                                                                                                                                                                                                                                                                                                                                                   |
| Background/rationale         | 2       | Explain the scientific background and rationale for the investigation being reported <b>pages 3, 4</b>                                                                                                                                                                                                                                                                                                                                                                                                                                                                                                                                                                                                            |
| Objectives                   | 3       | State specific objectives, including any pre-specified hypotheses <b>page 2, 3</b>                                                                                                                                                                                                                                                                                                                                                                                                                                                                                                                                                                                                                                |
| <b>Methods</b>               |         |                                                                                                                                                                                                                                                                                                                                                                                                                                                                                                                                                                                                                                                                                                                   |
| Study design                 | 4       | Present key elements of study design early in the paper <b>page 3, 4</b>                                                                                                                                                                                                                                                                                                                                                                                                                                                                                                                                                                                                                                          |
| Setting                      | 5       | Describe the setting, locations, and relevant dates, including periods of recruitment, exposure, follow-up, and data collection <b>page 3, 4</b>                                                                                                                                                                                                                                                                                                                                                                                                                                                                                                                                                                  |
| Participants                 | 6       | (a) <i>Cohort study</i> —Give the eligibility criteria, and the sources and methods of selection of participants. Describe methods of follow-up<br><i>Case-control study</i> —Give the eligibility criteria, and the sources and methods of case ascertainment and control selection. Give the rationale for the choice of cases and controls<br><i>Cross-sectional study</i> —Give the eligibility criteria, and the sources and methods of selection of participants <b>page 3, 4</b><br>(b) <i>Cohort study</i> —For matched studies, give matching criteria and number of exposed and unexposed<br><i>Case-control study</i> —For matched studies, give matching criteria and the number of controls per case |
| Variables                    | 7       | Clearly define all outcomes, exposures, predictors, potential confounders, and effect modifiers. Give diagnostic criteria, if applicable <b>page 4, 9</b>                                                                                                                                                                                                                                                                                                                                                                                                                                                                                                                                                         |
| Data sources/<br>measurement | 8*      | For each variable of interest, give sources of data and details of methods of assessment (measurement). Describe comparability of assessment methods if there is more than one group <b>page 4</b>                                                                                                                                                                                                                                                                                                                                                                                                                                                                                                                |
| Bias                         | 9       | Describe any efforts to address potential sources of bias <b>N/A</b>                                                                                                                                                                                                                                                                                                                                                                                                                                                                                                                                                                                                                                              |
| Study size                   | 10      | Explain how the study size was arrived at <b>page 4</b>                                                                                                                                                                                                                                                                                                                                                                                                                                                                                                                                                                                                                                                           |
| Quantitative variables       | 11      | Explain how quantitative variables were handled in the analyses. If applicable, describe which groupings were chosen and why <b>page 4, 5</b>                                                                                                                                                                                                                                                                                                                                                                                                                                                                                                                                                                     |
| Statistical methods          | 12      | (a) Describe all statistical methods, including those used to control for confounding <b>page 5</b><br>(b) Describe any methods used to examine subgroups and interactions <b>page 5</b><br>(c) Explain how missing data were addressed <b>N/A</b>                                                                                                                                                                                                                                                                                                                                                                                                                                                                |

1  
2 (d) *Cohort study*—If applicable, explain how loss to follow-up was addressed

3 *Case-control study*—If applicable, explain how matching of cases and controls was  
4 addressed

5 *Cross-sectional study*—If applicable, describe analytical methods taking account of  
6 sampling strategy **N/A**

---

7  
8 (e) Describe any sensitivity analyses

9 Continued on next page

10  
11  
12  
13  
14  
15  
16  
17  
18  
19  
20  
21  
22  
23  
24  
25  
26  
27  
28  
29  
30  
31  
32  
33  
34  
35  
36  
37  
38  
39  
40  
41  
42  
43  
44  
45  
46  
47  
48  
49  
50  
51  
52  
53  
54  
55  
56  
57  
58  
59  
60

For peer review only

**Results**

|                  |     |                                                                                                                                                                                                                                                                                                                                                                                                                                           |
|------------------|-----|-------------------------------------------------------------------------------------------------------------------------------------------------------------------------------------------------------------------------------------------------------------------------------------------------------------------------------------------------------------------------------------------------------------------------------------------|
| Participants     | 13* | (a) Report numbers of individuals at each stage of study—eg numbers potentially eligible, examined for eligibility, confirmed eligible, included in the study, completing follow-up, and analysed <b>page 4</b><br>(b) Give reasons for non-participation at each stage <b>N/A</b><br>(c) Consider use of a flow diagram <b>N/A</b>                                                                                                       |
| Descriptive data | 14* | (a) Give characteristics of study participants (eg demographic, clinical, social) and information on exposures and potential confounders <b>page 4, 6</b><br>(b) Indicate number of participants with missing data for each variable of interest <b>N/A</b><br>(c) <i>Cohort study</i> —Summarise follow-up time (eg, average and total amount)                                                                                           |
| Outcome data     | 15* | <i>Cohort study</i> —Report numbers of outcome events or summary measures over time<br><i>Case-control study</i> —Report numbers in each exposure category, or summary measures of exposure<br><i>Cross-sectional study</i> —Report numbers of outcome events or summary measures <b>page 6-8</b>                                                                                                                                         |
| Main results     | 16  | (a) Give unadjusted estimates and, if applicable, confounder-adjusted estimates and their precision (eg, 95% confidence interval). Make clear which confounders were adjusted for and why they were included <b>page 5, 7</b><br>(b) Report category boundaries when continuous variables were categorized <b>N/A</b><br>(c) If relevant, consider translating estimates of relative risk into absolute risk for a meaningful time period |
| Other analyses   | 17  | Report other analyses done—eg analyses of subgroups and interactions, and sensitivity analyses <b>page 5</b>                                                                                                                                                                                                                                                                                                                              |

**Discussion**

|                  |    |                                                                                                                                                                                             |
|------------------|----|---------------------------------------------------------------------------------------------------------------------------------------------------------------------------------------------|
| Key results      | 18 | Summarise key results with reference to study objectives <b>page 6-8</b>                                                                                                                    |
| Limitations      | 19 | Discuss limitations of the study, taking into account sources of potential bias or imprecision. Discuss both direction and magnitude of any potential bias <b>page 9</b>                    |
| Interpretation   | 20 | Give a cautious overall interpretation of results considering objectives, limitations, multiplicity of analyses, results from similar studies, and other relevant evidence <b>page 8, 9</b> |
| Generalisability | 21 | Discuss the generalisability (external validity) of the study results <b>page 8, 9</b>                                                                                                      |

**Other information**

|         |    |                                                                                                                                                                              |
|---------|----|------------------------------------------------------------------------------------------------------------------------------------------------------------------------------|
| Funding | 22 | Give the source of funding and the role of the funders for the present study and, if applicable, for the original study on which the present article is based <b>page 10</b> |
|---------|----|------------------------------------------------------------------------------------------------------------------------------------------------------------------------------|

\*Give information separately for cases and controls in case-control studies and, if applicable, for exposed and unexposed groups in cohort and cross-sectional studies.

**Note:** An Explanation and Elaboration article discusses each checklist item and gives methodological background and published examples of transparent reporting. The STROBE checklist is best used in conjunction with this article (freely available on the Web sites of PLoS Medicine at <http://www.plosmedicine.org/>, Annals of Internal Medicine at <http://www.annals.org/>, and Epidemiology at <http://www.epidem.com/>). Information on the STROBE Initiative is available at [www.strobe-statement.org](http://www.strobe-statement.org).

# BMJ Open

## Correlates and Etiological Factors Associated with Hedonic Well-Being Among an Aging Population of US Men and Women: secondary data analysis of a national survey

|                                 |                                                                                                                                                                                                                                                                                                                                                                     |
|---------------------------------|---------------------------------------------------------------------------------------------------------------------------------------------------------------------------------------------------------------------------------------------------------------------------------------------------------------------------------------------------------------------|
| Journal:                        | <i>BMJ Open</i>                                                                                                                                                                                                                                                                                                                                                     |
| Manuscript ID                   | bmjopen-2017-020962.R2                                                                                                                                                                                                                                                                                                                                              |
| Article Type:                   | Research                                                                                                                                                                                                                                                                                                                                                            |
| Date Submitted by the Author:   | 26-Jun-2018                                                                                                                                                                                                                                                                                                                                                         |
| Complete List of Authors:       | Odlum, Michelle; Columbia University, School of Nursing<br>Davis, Nicole; Clemson University School of Nursing<br>Owens, Otis; University of South Carolina College of Social Work<br>Preston, Michael; University of Arkansas for Medical Sciences<br>Brewer, Russell; Louisiana Public Health Institute<br>Black, Danielle; Columbia University School of Nursing |
| <b>Primary Subject Heading</b>: | Geriatric medicine                                                                                                                                                                                                                                                                                                                                                  |
| Secondary Subject Heading:      | Mental health, Patient-centred medicine, Sociology                                                                                                                                                                                                                                                                                                                  |
| Keywords:                       | Aging, Well-being, Gender differences, Health-related Quality of Life                                                                                                                                                                                                                                                                                               |
|                                 |                                                                                                                                                                                                                                                                                                                                                                     |

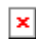

1  
2  
3 Correlates and Etiological Factors Associated with Hedonic Well-Being Among an Aging Population of US Men  
4 and Women: secondary data analysis of a national survey  
5

6 Michelle Odlum, EdD, MPH<sup>1</sup>, Nicole Davis, PhD, RN<sup>2</sup>, Otis Owens, PhD, MPH, Michael Preston, PhD, MPH<sup>4</sup>,  
7 Russell Brewer, DrPH, MPH<sup>3</sup>, and Danielle Black, MS, MPH<sup>5,1</sup>  
8

9 <sup>1</sup>Columbia University School of Nursing

10 <sup>2</sup>Clemson University School of Nursing

11 <sup>3</sup>University of South Carolina College of Social Work

12 <sup>4</sup>University of Arkansas for Medical Sciences

13 <sup>5</sup>Louisiana Public Health Institute

14 <sup>5</sup>Columbia University Mailman School of Public Health  
15  
16  
17

18 Corresponding Author: Michelle Odlum mlo12@columbia.edu 242 W 112<sup>th</sup> Street 5C New York, NY 10026  
19

20 **Author, addresses and affiliations:**

21  
22 Michelle Odlum, EdD, MPH  
23 Assistant Professor of Nursing  
24 Columbia University  
25 School of Nursing  
26 560 W 168 Street  
27 New York, NY, 10032  
28 347-806-2090  
29

30  
31 Nicole Davis, PhD, RN  
32 Assistant Professor of Nursing  
33 Clemson University  
34 School of Nursing  
35 University Center of Greenville  
36 225 S. Pleasantburg Drive, Suite B-5  
37 Greenville, SC 29607  
38 770-639-1501  
39

40  
41 Otis Owens, PhD, MPH  
42 Assistant Professor  
43 University of South Carolina  
44 College of Social Work  
45 1512 Pendleton St.  
46 Columbia, SC 29208  
47 901-218-2852

48  
49 Michael Preston, PhD, MPH  
50 Assistant Professor  
51 University of Arkansas for Medical Sciences  
52 4301 W Markham St  
53 Little Rock, AR 72205  
54 501-526-7101  
55  
56  
57  
58  
59  
60

Russell Brewer, DrPH, MPH  
Director, HIV and STI Portfolio  
Louisiana Public Health Institute  
1515 Poydras, Suite 1200  
New Orleans, LA 70112  
504-301-9825

Danielle Black, MA, MPH  
Graduate Research Assistant  
Columbia University  
School of Nursing  
617 W 168 Street  
New York, NY, 10032  
910-547-4907

## ABSTRACT

**Objective.** To understand the gender-specific factors that uniquely contribute to successful aging in a US population of men and women, 57-85 years of age. This was achieved through the examination of the correlates of subjective well-being defined by health-related quality of life (HRQoL), across several biological and psychosocial determinants of health.

**Design.** Cross sectional study

**Setting.** The NSHAP (National Social Life, Health and Ageing Project, 2010-11) a representative sample of the US population.

**Participants.** 3,377 adults aged 57 to 85 (1538 men, 1839 women) from the NSHAP.

**Main outcome measures.** The bio-psychosocial factors of Biological/Physiological Function, Symptom Status, Functional Status, General Health Perceptions and HRQoL-happiness.

**Method.** HRQoL was measured using the NSHAP Wave 2 multistage, stratified area probability sample of US households (N=3,377). Variable selection was guided by the Wilson's and Cleary's Model (WCM) that classifies health outcomes at five main levels and characteristics.

**Results.** Our findings indicate differences in bio-psychosocial factors comprised in the WCM and their relative importance and unique impact on HRQoL by gender. Women reported significantly lower HRQoL than men ( $t=3.5$ ,  $df=3366$ ). The most significant contributors to HRQoL in women were mental health ( $B=0.31$ ; 0.22, 0.39), loneliness ( $B=-0.26$ ; -0.35, -0.17), urinary incontinence ( $B=-0.22$ ; -0.40, -0.05) and support from spouse/partner ( $B=0.27$ ; 0.10, 0.43), and family ( $B=0.12$ ; 0.03, 0.20). Men indicated mental health ( $B=0.21$ ; 0.14, 0.29), physical health ( $B=0.17$ ; 0.10, 0.23), functional difficulties ( $B=0.38$ ; 0.10, 0.65), loneliness ( $B=-0.20$ ; -0.26, -0.12), depression ( $B=-0.36$ ; -0.58, -0.15) and support from friends ( $B=0.06$ ; 0.10, 0.11) as significant contributors. Those with greater social support had better HRQoL ( $F=4.22$ ,  $df=4$ ). Lack of companionship and reliance on spouse/partner were significant HRQoL contributors in both groups.

**Conclusion.** Our findings offer insight into aging, gender and subjective well-being. The results provide an opportunity to identify bio-psychosocial factors to inform interventions to support successful aging.



### Article Summary: Strengths and limitations of this study

- A variety of bio-psychosocial factors that contribute to well-being by gender were compared, where prior studies have not used gender as an independent variable.
- Effect sizes were used to summarize our regression analyses for a manageable and clinically interpretable picture of the unique contribution of gender across the comprehensive Wilson Cleary Model's (WCM), linking bio-psychosocial factors to overall well-being defined as Health Related Quality of Life - happiness.
- We were unable to establishing a cause-effect relationship or to determine changes in perceptions over time based on our cross-sectional analysis.
- We were limited to define the WCM levels based on variables in the NSHAP; yet with the variety of indicators captured in the NSHAP, this was a minor limitation.
- Beyond identified limitations, results mirrored prior research and contributed to the understanding of HRQoL gender-based differences, while controlling for potential confounders including age, race/ethnicity and socioeconomic status.

## INTRODUCTION

Successful aging was traditionally defined as the absence of disease and associated functional limitations.<sup>1</sup> However, the definition has shifted to a multidimensional view that accounts for psychosocial and cultural aspects of health and health related quality of life (HRQoL).<sup>1,2</sup> This shift in definition is driven by patient center care, patient empowerment and shared decision making with providers in the healthcare setting.<sup>2</sup> In fact, HRQoL is now viewed as an important complement to biomedical measures of health.<sup>3</sup> An important indicator of successful aging is subjective well-being, an aspect of HRQoL. Subjective well-being, is a direct predictor of health outcomes affecting biological, physical, and psychosocial changes in older adults.<sup>4,5</sup> Improvements in population-level well-being is an aspiration of society, sparking policy and economic debates.<sup>6</sup> Studies of life satisfaction have shown that subjective well-being is affected by a multitude of additional factors, including social and familial relationships. These additional factors may be protective, potentially decreasing or eliminating the chronic disease and symptom burden.<sup>6</sup>

Three approaches exist to capture subjective well-being; these are life evaluation (e.g., life satisfaction); hedonic well-being (e.g., experienced happiness, anger); and eudemonic well-being (e.g., life meaning and purpose).<sup>6</sup> Researchers suggest subjective well-being as a measure for healthcare resources allocation. Therefore, the need exists to further identify and understand the factors associated with successful aging.<sup>2,7</sup> It is also essential to compare these factors between men and women to determine the unique contribution of gender.<sup>2</sup> Evidence to date remains unclear as prior studies of gender differences have focused on specific chronic diseases or on socioeconomic and demographic factors, usually controlling for gender as a potential confounder and not as an independent variable.<sup>8</sup> Therefore, we sought to identify the correlates and etiological factors associated with hedonic well-being, specifically feelings of happiness, through a bio-psychosocial lens, accounting for gender variability, in an aging population of US adults. Happiness, served as a proxy for HRQoL. It is a measure of life satisfaction, the absence or presence of desirable or undesirable feelings or experiences. It is proven useful in the analysis of HRQoL.<sup>9</sup>

Guided by the Wilson's and Cleary's Conceptual Model (WCM), Figure 1 we analyzed the National Social Life, Health and Aging Project (NSHAP), second wave data. We examined whether objective (e.g., biological/physiological) and self-perceived measures (e.g., functional status) of health explain gender differences in HRQoL (i.e., happiness). Self-rated perceptions of health have been observed to correlate with other health indicators including morbidity.<sup>10</sup> We determined the best models predicting the HRQoL of male and female US adults ages 57 to 85.<sup>11</sup> We explored the extent to which the WCM levels interact to predict HRQoL and provide greater insight into aging. The bio-psychosocial WCM was selected for our analysis as it considers health outcomes on a continuum of increasing complexity and health trajectories associated with aging. It is also shown to enhance knowledge about HRQoL in diverse populations.<sup>11</sup> The model classifies health outcomes at five main levels.<sup>11</sup> The first level Biological/Physiological function, examines the individual as a whole. Symptoms (level 2), are the perceptions of physical, emotional, and cognitive states. Symptoms are considered significant determinants of Functional Status (level 3), with biological and symptom variables evidenced to be correlated with Functional Status. General Health Perceptions (level 4) are subjective appraisals of health and Overall Quality of Life (level 5) as a whole.<sup>11</sup> Variables that comprise each level interact in complex ways to determine HRQoL. Arrows linking the five main levels indicate dominant causal relationships. In addition, the five main levels are influenced by individual (e.g., age, education) and environmental characteristics (e.g., social support).<sup>11</sup> Studies of hedonic states, including happiness, have predicted morbidity and mortality. However, confounding factors indicate that well-being is coupled with additional factors such as education.<sup>10</sup> The WCM controls for potential confounding. Additionally, different than prior studies that compared the quantified HRQoL scores across gender, we identified the hierarchical differences of each WCM level and their weighted contribution to HRQoL (happiness).

## METHODS

**Participants.** The second wave of the NSHAP survey, a National sample of US adults ages 57 to 85, was utilized in our analysis, was conducted from 2010-2011.<sup>12</sup> The survey focused on exploring interpersonal connections and overall health outcomes as they relate to: culture, gender and socioeconomic status; health behaviors; health care utilization, social support, and well-being.<sup>12</sup> Our current study utilized Wave 2 data to explore the relationship between the WCM constructs for both men and women. Wave 2, with its large sample size (N=3,377) and strong methodology, allowed us to systematically investigate important aspects of HRQoL and aging.

**Measures.** NSHAP variables used in our analysis were selected based on best fit with the WCM constructs. Thirty variables were selected. We categorized the five main levels and characteristics of the WCM under two overarching categories of Objective and Subjective health indicators, Figure 1. The Objective indicators of the first main level of Biological/Physiological Function were, categorical: Body Mass Index (BMI), and continuous: average pulse rate, and average blood pressure (systolic and diastolic). The last four main levels of the WCM comprised Subjective health indicators. These included the assessment of participant perceptions of health outcomes on both individual and societal levels. Variables that comprised Symptom Status were categorical: pain, pain level, fatigue, urinary incontinence, stool incontinence and continuous: depression, anxiety. Variables that comprised Functional Status were categorical: physical function difficulty, companionship and feeling left out or isolated and continuous: perceptions of control. Variables that comprised General Health Perceptions were continuous self-rated physical and mental health.

Our continuous outcome variable of interest for HRQoL in this study was defined by hedonic well-being: self-rated happiness, asked participants thoughts and feelings about their life overall. The WCM also accounts for important individual and environment influences directly impacting objective and subjective indicators. Variables that comprise Individual Characteristics were categorical: insurance coverage, age group, education, race/ethnicity, and provider visits. Variables that comprise Environmental Characteristics were categorical: marital status, reliance on spouse/partner, relatives and friends, and number of close family/relatives and friends.

**Statistical analysis.** The association between HRQoL (i.e., happiness) and the constructs of the WCM were examined in separate analyses for male and female participants. Descriptive statistics were conducted to characterize the sample and variable distributions. Participant characteristics were summarized with means and standard deviations for continuous variables and percentages and frequencies for categorical variables. Individual and environmental characteristics were also examined for potential confounding. Correlations were calculated to determine the relationship between the WCM construct and characteristic variables and reported HRQoL by participants. Bivariate analysis was conducted. Chi square analyses were used to assess differences in categorical variables and T-tests in continuous variables, by gender. Linear regression analyses were performed to assess the relevant importance of significantly correlated variables that potentially contribute to HRQoL. For model validation, our dataset was randomly divided, using a split-sample technique, into a developmental: n=1689 and validation: n=1688 group before identifying final model variables.<sup>13</sup> The development model was selected through a stepwise multiple regression to identify the model of best fit. To determine the accuracy of the developmental model, a regression model was calculated with the validation dataset for the retained variables. To choose the final model, adjusted R<sup>2</sup> values, Standardized  $\beta$ s and unstandardized slopes (B) were observed between the developmental and validation models to ensure analytic comparability. Variables with significant differences (p<0.05) were retained for additional analysis.

Two independent stepwise multiple regressions were then performed based on gender (i.e., men and women) to identify variables, by gender, best associated with HRQoL. Retained variables were ranked by partial R<sup>2</sup> order to determine their relative contribution. Effect sizes were also estimated for each retained variable with t-values corresponding to the coefficient estimates divided by the associated standard errors. To identify constructs with the most consistent associations with HRQoL, effect sizes and R<sup>2</sup> rankings were averaged per WCM construct for men and women. Data analysis was conducted with use of SPSS 22.0. The stepwise approach allows for the prevention of bias in the selection of variables in the final model.<sup>14 15</sup>

**Table 1. Demographic Characteristics of Participants (N=3,377)**

|                                   | <i>N</i> | <i>(%)</i> |
|-----------------------------------|----------|------------|
| <b>Gender</b>                     |          |            |
| <b>Men</b>                        | 1538     | 45.5       |
| 69 or Under                       | 585      | 38.0       |
| 70-79                             | 610      | 39.7       |
| 80 or older                       | 343      | 22.3       |
| <b>Women</b>                      | 1839     | 54.5       |
| 69 or Under                       | 812      | 44.2       |
| 70-79                             | 633      | 34.4       |
| 80 or older                       | 394      | 21.4       |
| <b>Race</b>                       |          |            |
| <b>Men</b>                        |          |            |
| non-Black, non-Hispanic           | 1147     | 74.6       |
| Black or African American         | 217      | 14.1       |
| non-Black Hispanics               | 174      | 11.3       |
| <b>Women</b>                      |          |            |
| non-Black, non-Hispanic           | 1346     | 73.2       |
| Black or African American         | 300      | 16.3       |
| non-Black Hispanics               | 193      | 10.5       |
| <b>Education</b>                  |          |            |
| <b>Men</b>                        |          |            |
| more than High School             | 884      | 57.5       |
| High School or less               | 654      | 42.5       |
| <b>Women</b>                      |          |            |
| more than High School             | 1015     | 55.2       |
| High School or less               | 824      | 44.8       |
| <b>Insurance Coverage</b>         |          |            |
| <b>Men</b>                        |          |            |
| Medicaid-Medicare                 | 1080     | 83.9       |
| Private                           | 161      | 12.5       |
| None                              | 46       | 3.6        |
| <b>Women</b>                      |          |            |
| Medicaid-Medicare                 | 1227     | 79.1       |
| Private                           | 250      | 16.1       |
| None                              | 75       | 4.8        |
| <b>Marital Status</b>             |          |            |
| <b>Men</b>                        |          |            |
| Married                           | 1201     | 78.1       |
| Not currently Married             | 337      | 21.9       |
| <b>Women</b>                      |          |            |
| Married                           | 1085     | 59.0       |
| Not currently Married             | 754      | 41.0       |
| <b>Partnership if non-Married</b> |          |            |
| <b>Men</b>                        |          |            |
| No                                | 231      | 77.5       |
| <b>Women</b>                      |          |            |
| No                                | 659      | 93.1       |

**Patient Involvement.** As an analysis of secondary data, no participants were not involved in the development of our research questions or with the analysis of the outcome measures. Additionally, participants were not involved with the interpretation of data or the writing of our analytic findings. Dissemination of analytic findings to study participants or members of their associated communities will not be accomplished.

## RESULTS

A total of 3,377 participants were included in the analysis. The majority of participants (54.5%) were women. The largest percentage of men were in the 70-79 age group (39.7%) with the largest percentage of women in the 69 and under age group (44.2%). The sample was predominantly non-Black, non-Hispanic (73.8%, N=2493). Most participants had at least a high school education (56.2%, N=1899). More than two-thirds were married (67.7%, N=2286). Of those who indicated they were unmarried, 88.5% (N=890) were not in any romantic, intimate, or sexual partnerships. More than two-thirds had health care coverage in the form of Medicaid, Medicare, or a combination of both (81.3%, N=2307). Tables 1 and 2 provides a breakdown of the demographic characteristics and significant differences for variables that comprise the WCM constructs for men and women.

**Table 2. Independent Samples T-tests and  $X^2$  for Wilson Cleary Model construct-specific variables with Men and Women (N=3,377)**

|                                          |                                         | Men        | Women      | $X^2$ /T-test | df   |
|------------------------------------------|-----------------------------------------|------------|------------|---------------|------|
| BIOLOGICAL/<br>PHYSIOLOGICAL<br>FUNCTION | BMI (normal)                            | 36.5%      | 63.5%      | 29.0**        | 2    |
|                                          | Diastolic average                       | 79.0±12.0  | 81.0±11.5  | -6.4**        | 3255 |
|                                          | Systolic Average                        | 138.0±20.7 | 137.0±21.0 | 1.6           | 3255 |
|                                          | Pulse Average                           | 67.7±12.1  | 69.8±11.2  | -5.1**        | 3035 |
| SYMPTOM STATUS                           | Pain                                    | 43.8%      | 56.2%      | 8.9**         | 1    |
|                                          | Pain: level (no pain)                   | 50.0%      | 50.0%      | 11.2          | 6    |
|                                          | Depression(CESD total) <sup>1</sup> §   | 1.8±0.3    | 2.0±0.4    | -6.6**        | 3312 |
|                                          | Anxiety (HADS total) <sup>2</sup> §     | 1.8±0.5    | 1.8±0.4    | -0.8          | 2627 |
|                                          | Fatigue                                 | 54.7%      | 45.3%      | 3.1           | 3    |
|                                          | Urinary Incontinence§                   | 30.2%      | 69.8%      | 94.7**        | 1    |
|                                          | Stool Incontinence                      | 30.4%      | 69.6%      | 15.5**        | 1    |
| FUNCTIONAL<br>STATUS                     | No Physical Function Difficulty§        | 46.1%      | 53.9%      | 27.1          | 16   |
|                                          | Perceptions of Control                  | 2.3±0.5    | 2.2±0.6    | 2.7**         | 2665 |
|                                          | Companionship§                          | 49.8%      | 50.2%      | 21.0**        | 3    |
|                                          | Feel left Out                           | 54.0%      | 46.0%      | 3.1           | 3    |
|                                          | Feel Isolated§                          | 55.8%      | 44.2%      | 1.5           | 3    |
| GENERAL HEALTH<br>PERCEPTIONS            | Self-rated physical health§             | 3.2±1.1    | 3.2±1.0    | -0.7          | 3370 |
|                                          | Self-rated mental health§               | 3.7±1.0    | 3.6±1.0    | 3.2**         | 3372 |
| INDIVIDUAL<br>CHARACTERISTICS            | Insurance                               | 96.4%      | 95.2%      | 10.95**       | 1    |
|                                          | Age Category (≥70)                      | 62%        | 55.8%      | 14.1**        | 1    |
|                                          | Education (> HS)§                       | 57.5%      | 55.2%      | 1.78          | 1    |
|                                          | Race/Ethnicity (non-Black non-Hispanic) | 74.6%      | 73.2%      | 3.39          | 1    |
|                                          | Seen the doctor in last year§           | 3.0±1.5    | 3.04±1.5   | -1.28         | 3367 |
| ENVIRONMENTAL<br>CHARACTERISTICS         | Rely on family                          | 36.9%      | 63.1%      | 42.14**       | 3    |
|                                          | Has close family/relatives§             | 38.6%      | 61.4%      | 52.05**       | 5    |
|                                          | Rely on friends                         | 44.3%      | 55.7%      | 71.78**       | 3    |
|                                          | Has friends§                            | 44.9%      | 55.1%      | 13.12*        | 5    |
|                                          | Rely on spouse/partner§                 | 63.3%      | 36.70%     | 26.92**       | 3    |

Note. \*\*p < 0.01, \*p < 0.05; <sup>1</sup>Center for Epidemiological Studies Depression (CESD); <sup>2</sup>Hospital Anxiety and Depression Scale (HADS)

§Variables that comprise the validated regression model and retained for subsequent gender-related regression analysis.

Bivariate correlation analyses were initially conducted to examine the associations between the outcome HRQoL variable and those that comprised the WCM constructs. For men, of the original 30 variables, bivariate correlation analysis led to the elimination of six variables (24 remaining), for women the elimination of seven variables (23 remaining). All significantly correlated variables that comprised the WCM constructs and characteristics were then validated by linear regression, reducing the variable list from 24 to 13 (Table 2), for final model development by gender. HRQoL happiness scores were compared by the total scores for men, women and participants combined across the categorized age groups (69 or younger, 70-79, 80 or older). Significant results were observed across age groups for combined participants ( $X^2=18.6$ ,  $p=.017$ ) and for women ( $X^2=20.1$ ,  $p=.010$ ), both having significantly lower HRQoL score with increasing age.

**Table 3. WCM Constructs and HRQoL Outcomes ( $N=3,377$ )**

|                               | Partial R <sup>2</sup> | Partial R <sup>2</sup> Rank | Effect Size (t-value) | Average R <sup>2</sup> Ranks | Average Effect Sizes (t-values) |
|-------------------------------|------------------------|-----------------------------|-----------------------|------------------------------|---------------------------------|
| <b>MEN</b>                    |                        |                             |                       |                              |                                 |
| GENERAL HEALTH PERCEPTIONS    | 0.24, 1.8              | 1, 3                        | 8.3, 5.9              | 2                            | 7.1                             |
| FUNCTIONAL STATUS             | 0.21, .07              | 2, 6                        | 7.2, 2.2              | 4                            | 4.7                             |
| SYMPTOM STATUS                | 0.14                   | 4                           | 4.8                   | 4                            | 4.8                             |
| ENVIRONMENTAL CHARACTERISTICS | 0.09                   | 5                           | 3.0                   | 5                            | 3.0                             |
| <b>WOMEN</b>                  |                        |                             |                       |                              |                                 |
| GENERAL HEALTH PERCEPTIONS    | 0.39                   | 1                           | 9.4                   | 1                            | 9.4                             |
| FUNCTIONAL STATUS             | 0.33                   | 2                           | 7.9                   | 2                            | 7.9                             |
| SYMPTOM STATUS                | 0.03                   | 5                           | 0.68                  | 5                            | 0.68                            |
| ENVIRONMENTAL CHARACTERISTICS | 0.16, 0.12             | 3, 4                        | 3.6, 2.6              | 3.5                          | 3.09                            |

Separate linear regression analyses were conducted for men and women. Partial R<sup>2</sup> were ranked from 1 (most important) to 5 (least important) for men and women separately, with significant variables identified. Additionally, the last two columns on Table 3 contain the average of the R<sup>2</sup> ranking and the average effect sizes. The highest ranking variable for overall HRQoL happiness for men was General Health Perceptions (self-rated: mental health and physical health), Symptom Status (CESD- Depression score) and Functional Status (Lack companionship) both ranked second based on R<sup>2</sup> ranks, with Symptom Status having a greater average effect size. Physical Function Difficulty and Environmental Characteristics (Rely on spouse/partner) were last. Our regression analyses identified variables that, in the presence of all others, make a unique and direct contribution to HRQoL happiness.<sup>10</sup> The highest ranking variable for overall HRQoL for women was General Health Perceptions (mental health), followed by Functional Status (Lack of Companionship), Environmental Characteristics (Rely on spouse/partner and Number of close family members) and Symptom Status (urinary incontinence). The hierarch of contributing WCM constructs to overall HRQoL are ranked for men and women, Table 4.



**Table 4. Hierarchy of HRQoL Contributors based on Average Effect Sizes (N=3,377)**

| Rank         | Item Descriptions             |                                                   |
|--------------|-------------------------------|---------------------------------------------------|
| <b>MEN</b>   |                               |                                                   |
| 1st          | GENERAL HEALTH PERCEPTIONS    | Self-rated: mental health and physical health     |
| 2nd          | SYMPTOM STATUS                | Depression                                        |
| 3rd          | FUNCTIONAL STATUS             | Lack companionship, Physical Function Difficulty  |
| 4th          | ENVIRONMENTAL CHARACTERISTICS | Number of close friends                           |
| <b>WOMEN</b> |                               |                                                   |
| 1st          | GENERAL HEALTH PERCEPTIONS    | Self-rated: mental health                         |
| 2nd          | FUNCTIONAL STATUS             | Lack companionship                                |
| 3rd          | ENVIRONMENTAL CHARACTERISTICS | Rely on spouse/partner and Number of close family |
| 4th          | SYMPTOM STATUS                | Urinary Incontinence                              |

## DISCUSSION

Understanding subjective well-being and its association with health in older adults is still in its early stages. Consequently, the extent to which a variety of bio-psychosocial factors attribute to well-being and account for gender-related differences remain unclear. To explore this further, we utilized the WCM which offers the most comprehensive view of pathways linking the most relevant bio-psychosocial variables to overall well-being defined as HRQoL happiness.<sup>2,11,16,17</sup> Epidemiologic studies of happiness have predicted long term morbidity and mortality. Previous studies have shown that subjective well-being is not universal across populations, yet Individual Characteristics including, education and race/ethnicity, did not significantly contribute to HRQoL happiness in our population.<sup>10</sup> Our results did however, identify significant differences between men and women in the type and contribution of bio-psychosocial factors to HRQoL happiness. The overall models allowed for us to observe the interplay between various aspects of aging by gender.<sup>11</sup>

### Mechanisms and Implications

Women reported significantly lower HRQoL than men. Our findings also indicated a significant decrease in HRQoL as age increased for the entire sample and for women. A decrease in HRQoL was also observed for men, but the results were not significant. Previous studies have identified lower HRQoL in populations of older women. It is hypothesized that gender-related differences in HRQoL of older adults may be in their perceptions of symptoms and illness progression, with men being less focused on symptom recognition until they are severe.<sup>8</sup> Interestingly, although there were no significant differences in perceptions of physical health between men and women in our analysis, it was the greatest contributor of HRQoL in men. Similarly, the third greatest contributor to HRQoL in men was the Functional Status level factor Physical Function Difficulty, also not observed in women. Prior studies have indicated that functional difficulty generally comprise the majority of an individual's functional health status, which in our study again was only associated with men. This is an interesting finding and may be attributed to the increased likelihood of men suffering from more severe and life threatening chronic conditions than women.<sup>8</sup> Instead, women are more likely to suffer from non-life threatening diseases including autoimmune disorders.<sup>8</sup> Social support significantly contributed to HRQoL in both men and women. The lack of companionship under the Functional Status level was significant in both groups. These findings align with the literature on loneliness in older ages and its adverse effects on HRQoL.<sup>18,19</sup> The reduction of inter-generational living and greater geographic expansion, has increased the report of loneliness in populations of older adults. Loneliness directly increases the likelihood of chronic diseases and all-cause mortality.<sup>21</sup> In our sample, the number of close family members was seen a significant contributor to HRQoL for women only. Having close family members may be more important to women, with 41 percent of the female sample reported being unmarried, only 21.9 percent of men. Additionally, HRQoL scores were significantly higher for married women. For those who reported being unmarried with a romantic, intimate, or sexual partner, men were significantly higher at 22.5 percent and women at 6.9 percent. Participants who reported greater social support from partners and relatives had higher HRQoL. Unhealthy familial relationships were predictors of loneliness in a prior study, particularly for the unmarried.<sup>18,19</sup> Their findings identify family ties as the most significant contributor to loneliness.<sup>18,19</sup> This aligns with our findings as women who reported a greater number of reliable family members had significantly higher HRQoL scores. Therefore, the need exists for the consideration of social networks<sup>20,21</sup> and their impact on HRQoL in risk

assessment and intervention development to improve aging-related outcomes. Previous studies have also shown that men and women who were satisfied with their family relationship had 1.8 and 3.0 times higher odds of good HRQoL, respectively. Frequent contacts and visits with friends or family motivate the participation in activities and increase HRQoL.<sup>21,22</sup>

The highest level significant contributor to HRQoL in both men and women was the General Health Perceptions level which both comprised of mental health. In fact, those who reported better mental health outcomes reported higher HRQoL. Men reported better mental health at a significantly higher level than women. Yet, depression was the only significant factor for the Symptom Status level in men alone and was the second highest contributor to their HRQoL. Other studies have shown that mental health concerns and symptoms of depression significantly impact HRQoL.<sup>2,11,23</sup> Our findings align with the literature on depression, with depression in women reported to be higher.<sup>16,24,2,11,25-28</sup> In fact, in our sample, depression scores for women were significantly higher than for men. Yet, depression was a major contributor to HRQoL only in men. Studies have shown that unmarried men have lower HRQoL compared to married men. Our findings show significantly higher depression scores for married men in our sample. Those who reported having demanding or critical spouses or did not spend much time with their spouses had significantly higher Depression scores. Though not significant in the hierarchical model, women with demanding and critical spouses also reported significantly higher depression scores. These results further reinforce our findings that relationship quality is a major contributor to HRQoL. Urinary incontinence was the only significant factor in the Symptom Status level for women. Those with urinary incontinence had significantly lower HRQoL scores. Our findings align with the literature, with recent studies indicating that women were more likely to report urinary incontinence and impaired HRQoL.<sup>29,30</sup> Additionally, pelvic organ prolapse (POP), which often peaks for women in their seventies, include the symptoms of urinary incontinence. Studies have shown significantly impaired quality for women with POP over the age of 50.<sup>31</sup> Symptomatic POP is evidenced to have a tremendous impact on general health-related quality of life and similar to disabilities, it can contribute to physical immobility, pain, diminished energy, sleep disturbance, emotional instability and social isolation.<sup>31</sup> Studies have also shown that self-image is considered to be more important to women than men. In fact, in a study comparing HRQoL indicators between older men and women, a positive attitude about oneself was ranked in the top ten only for women.<sup>32,33</sup> Urinary incontinence may impact self-image, increasing the likelihood of depression and social isolation. Our findings indicate women who report urinary incontinence had significantly higher Depression scores; consistent with the higher likelihood of Depression and anxiety disorders in women compared to men.<sup>8</sup>

### Strengths and limitations

Our analysis was based on a cross-sectional, single wave (Wave 2) of the NSHAP data and does not allow for establishing a cause-effect relationship or the determination of changes in perceptions over time. Our analysis is also limited to define the WCM levels based on variables included in the NSHAP, a limitation inherent to secondary data analysis. However, with the variety of indicators that comprise the NSHAP, this was a minor limitation.

Variables that may indirectly impact HRQoL are not identified, yet our analytic approach provides a minimum collection of variables necessary to begin the development of structural equation models to observe directional relationships. In fact, our regression approach identified the variables that make a distinct and direct contribution to HRQoL. Furthermore, our model validation ensured that variable selection for the gender models were not due to chance. HRQoL was measured with one item of self-reported happiness in the NSHAP. Our single item analysis may be considered less sensitive than the use of other HRQoL measures or validated tools. Yet, beyond the identified limitations, our study findings mirrored and reinforce prior research and further contributed to understanding HRQoL differences between older men and women while adjusting for confounders including age, race/ethnicity and socioeconomic status.

### Conclusions and implications

The current analysis provides additional evidence to support insight into subjective well-being as it relates to successful aging. The findings of our analysis enhances our understanding of the bio-psychosocial factors that impact the HRQoL of older men and women. Our results add to the literature on successful aging in addition to the utility of the WCM in understanding the impact of HRQoL based on a variety of associated factors that comprise

1  
2  
3 the models levels. We observed both similarities and differences between men and women based on the levels that  
4 best contribute to HRQoL. Further investigation is needed to determine the causal factors of the identified  
5 relationships between WCM levels and HRQoL. Other indicators of subjective well-being (e.g., life evaluations and  
6 eudemonic well-being) must also be assessed for collaborative care informed by mental and physical health.<sup>10</sup> In  
7 addition to informing the development of effective interventions to improve well-being independent of morbidity,  
8 income and other aging related factors that have adversely contributed to poor health outcomes.  
9

10  
11 **Contributors:** All authors assisted in the interpretation of data, the drafting and revising of important intellectual  
12 content and manuscript approval. The first author (MO) designed the work and analyzed the data. All authors  
13 assisted substantially in the data interpretation (MO, ND, OO, MP, RB), manuscript drafting (MO), revising for  
14 important intellectual content (MO, ND, OO, MP, RB, DB), final manuscript approval (MO, ND, OO, MP, RB,  
15 DB) and agreed accountability for all aspects of this work (MO, ND, OO, MP, RB, DB).  
16

17 **Funding:** The National Social Life, Health and Aging Project is supported by the National Institute on Aging of the  
18 National Institutes of Health (R37AG030481; R01AG033903). The content is the responsibility of the authors and  
19 does not necessarily represent the official views of the National Institutes of Health.  
20

21 **Competing Interests:** Authors have completed the Unified Competing Interest form at  
22 [http://www.icmje.org/coi\\_disclosure.pdf](http://www.icmje.org/coi_disclosure.pdf) (available upon request from the corresponding author) and declare that  
23 (1) our authors had no involvement with any company in the submission of this work; (2) our authors have no  
24 relationships with any companies that might be interested in the work that has been submitted in the previous 3  
25 years; (3) our authors spouses, partners, or children have no financial relationships relevant to the work that has  
26 been submitted; and (4) our authors have no non-financial interests relevant to the work that has been submitted.  
27

28 **Ethical approval:** The NSHAP data analysis was carried out with de-identified, unrestricted Wave 2 Public Use  
29 File v1 designed for public dissemination. This dataset is appropriate for preliminary analyses and for the  
30 exploration of health and functioning of older American adults.  
31

32 **Data sharing:** Wave 2 Public Use File v1 data for the National Social Life Health and Aging Project are available  
33 at <http://www.icpsr.umich.edu/icpsrweb/NACDA/studies/34921>.  
34  
35  
36  
37  
38  
39  
40  
41  
42  
43  
44  
45  
46  
47  
48  
49  
50  
51  
52  
53  
54  
55  
56  
57  
58  
59  
60

## REFERENCES

1. Topaz M, Troutman-Jordan M, MacKenzie M. Construction, Deconstruction, and Reconstruction: The Roots of Successful Aging Theories. *Nurs Sci Q*. 2014;27(3):226-233.
2. Zubritsky C, Abbott KM, Hirschman KB, Bowles KH, Foust JB, Naylor MD. Health-related quality of life: expanding a conceptual framework to include older adults who receive long-term services and supports. *Gerontologist*. 2013;53(2):205-210.
3. Haraldstad K, Rohde G, Stea TH, et al. Changes in health-related quality of life in elderly men after 12 weeks of strength training. *Eur Rev Aging Phys Act*. 2017;14:8.
4. Chambers LA, Wilson MG, Rueda S, et al. Evidence informing the intersection of HIV, aging and health: a scoping review. *AIDS Behav*. 2014;18(4):661-675.
5. Lim JW, Gonzalez P, Wang-Letzkus MF, Ashing-Giwa KT. Understanding the cultural health belief model influencing health behaviors and health-related quality of life between Latina and Asian-American breast cancer survivors. *Support Care Cancer*. 2009;17(9):1137-1147.
6. Banerjee S. Multimorbidity—older adults need health care that can count past one. *The Lancet*. 2015;385(9968):587-589.
7. Lopez-Otin C, Blasco MA, Partridge L, Serrano M, Kroemer G. The hallmarks of aging. *Cell*. 2013;153(6):1194-1217.
8. Cherepanov D, Palta M, Fryback DG, Robert SA. Gender differences in health-related quality-of-life are partly explained by sociodemographic and socioeconomic variation between adult men and women in the US: evidence from four US nationally representative data sets. *Qual Life Res*. 2010;19(8):1115-1124.
9. Michalos AC. Social Indicators Research and Health-Related Quality of Life Research. In: *Connecting the Quality of Life Theory to Health, Well-being and Education: The Selected Works of Alex C. Michalos*. Cham: Springer International Publishing; 2017:25-58.
10. Steptoe A, Deaton A, Stone AA. Subjective wellbeing, health, and ageing. *The Lancet*. 2015;385(9968):640-648.
11. Sousa KH, Kwok OM. Putting Wilson and Cleary to the test: analysis of a HRQOL conceptual model using structural equation modeling. *Qual Life Res*. 2006;15(4):725-737.
12. Waite LJ, Laumann EO, Das A, Schumm LP. Sexuality: measures of partnerships, practices, attitudes, and problems in the National Social Life, Health, and Aging Study. *J Gerontol B Psychol Sci Soc Sci*. 2009;64 Suppl 1:i56-66.
13. Han K, Song K, Choi BW. How to Develop, Validate, and Compare Clinical Prediction Models Involving Radiological Parameters: Study Design and Statistical Methods. *Korean J Radiol*. 2016;17(3):339-350.
14. Rodriguez AM, Mayo NE, Gagnon B. Independent contributors to overall quality of life in people with advanced cancer. *Br J Cancer*. 2013;108(9):1790-1800.
15. Schildcrout JS, Basford MA, Pulley JM, et al. An analytical approach to characterize morbidity profile dissimilarity between distinct cohorts using electronic medical records. *J Biomed Inform*. 2010;43(6):914-923.
16. Shiu AT, Choi KC, Lee DT, Yu DS, Man Ng W. Application of a health-related quality of life conceptual model in community-dwelling older Chinese people with diabetes to understand the relationships among clinical and psychological outcomes. *J Diabetes Investig*. 2014;5(6):677-686.
17. Rizzo VM, Kintner E. Understanding the impact of racial self-identification on perceptions of health-related quality of life: a multi-group analysis. *Qual Life Res*. 2013;22(8):2105-2112.
18. Chen Y, Feeley TH. Social support, social strain, loneliness, and well-being among older adults. *Journal of Social and Personal Relationships*. 2013;31(2):141-161.
19. Shiovitz-Ezra S, Leitsch S. The Role of Social Relationships in Predicting Loneliness: The National Social Life, Health, and Aging Project. *Social Work Research*. 34(3):157-167.



- 1
- 2
- 3 20. Rogers A, Brooks H, Vassilev I, Kennedy A, Blickem C, Reeves D. Why less may be more: a
- 4 mixed methods study of the work and relatedness of 'weak ties' in supporting long-term condition
- 5 self-management. *Implement Sci.* 2014;9:19.
- 6 21. Gesell SB, Barkin SL, Valente TW. Social network diagnostics: a tool for monitoring group
- 7 interventions. *Implement Sci.* 2013;8:116.
- 8 22. Crookes DM, Shelton RC, Tehranifar P, et al. Social networks and social support for healthy
- 9 eating among Latina breast cancer survivors: implications for social and behavioral interventions.
- 10 *J Cancer Surviv.* 2015.
- 11 23. Uchino BN, Ruiz JM, Smith TW, et al. The Strength of Family Ties: Perceptions of Network
- 12 Relationship Quality and Levels of C-Reactive Proteins in the North Texas Heart Study. *Ann*
- 13 *Behav Med.* 2015;49(5):776-781.
- 14 24. Druss BG, Zhao L, von Esenwein SA, et al. The Health and Recovery Peer (HARP) Program: a
- 15 peer-led intervention to improve medical self-management for persons with serious mental illness.
- 16 *Schizophr Res.* 2010;118(1-3):264-270.
- 17 25. Brito K, Edirimanne S, Eslick GD. The extent of improvement of health-related quality of life as
- 18 assessed by the SF36 and PASEIKA scales after parathyroidectomy in patients with primary
- 19 hyperparathyroidism--a systematic review and meta-analysis. *Int J Surg.* 2015;13:245-249.
- 20 26. Bekelman DB, Hooker S, Nowels CT, et al. Feasibility and acceptability of a collaborative care
- 21 intervention to improve symptoms and quality of life in chronic heart failure: mixed methods pilot
- 22 trial. *J Palliat Med.* 2014;17(2):145-151.
- 23 27. Chan R, Brooks R, Erlich J, et al. How do clinical and psychological variables relate to quality of
- 24 life in end-stage renal disease? Validating a proximal-distal model. *Qual Life Res.*
- 25 2014;23(2):677-686.
- 26 28. Bakas T, McLennon SM, Carpenter JS, et al. Systematic review of health-related quality of life
- 27 models. *Health Qual Life Outcomes.* 2012;10:134.
- 28 29. Phillips VL, Bonakdar Tehrani A, Langmuir H, Goode PS, Burgio KL. Treating Urge
- 29 Incontinence in Older Women: A Cost-Effective Investment in Quality-Adjusted Life-Years
- 30 (QALY). *Journal of Geriatrics.* 2015;2015:1-7.
- 31 30. Dumoulin C, Hay-Smith J, Habee-Seguin GM, Mercier J. Pelvic floor muscle training versus no
- 32 treatment, or inactive control treatments, for urinary incontinence in women: a short version
- 33 Cochrane systematic review with meta-analysis. *Neurourol Urodyn.* 2015;34(4):300-308.
- 34 31. X. F, N. V, M. Z, G. B, V. R. Symptomatic Pelvic Organ Prolapse at Midlife, Quality of Life, and
- 35 Risk Factors. *Obstetrics & Gynecology.* 113(3):609-616.
- 36 32. Kirchengast S, Haslinger B. Gender Differences in Health-Related Quality of Life Among Healthy
- 37 Aged and Old-Aged Austrians: Cross-Sectional Analysis *Gender Medicine.* 2008;5(3):270-278.
- 38 33. Mundet L, Ribas Y, Arco S, Clave P. Quality of Life Differences in Female and Male Patients
- 39 with Fecal Incontinence. *J Neurogastroenterol Motil.* 2016;22(1):94-101.
- 40
- 41
- 42
- 43
- 44
- 45
- 46
- 47
- 48
- 49
- 50
- 51
- 52
- 53
- 54
- 55
- 56
- 57
- 58
- 59
- 60

Figure 1. Operationalized Wilson Cleary Model with study-specific bio-psycho-social measures

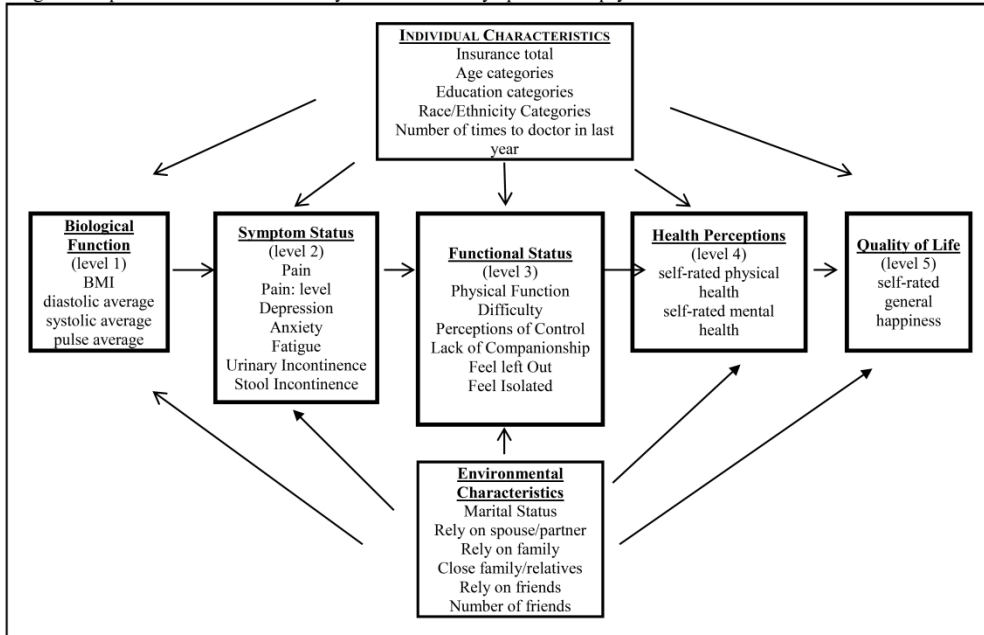

Figure 1 Operationalized Wilson Cleary Model with study-specific bio-psycho-social measures

564x372mm (300 x 300 DPI)



## STROBE Statement—checklist of items that should be included in reports of observational studies

## Correlates and Etiological Factors Associated with Hedonic Well-Being Among an Aging Population of US Men and Women: secondary data analysis of a national survey

Michelle Odlum, EdD, MPH<sup>1</sup>, Nicole Davis, PhD, RN<sup>2</sup>, Otis Owens, PhD, MPH, Michael Preston, PhD, MPH<sup>4</sup>, Russell Brewer, DrPH, MPH<sup>3</sup>, and Danielle Black, MS, MPH<sup>5,1</sup>

|                              | Item No | Recommendation                                                                                                                                                                                                                                                                                                                                                                                                                                                                                                                                                                                                                                                                                                    |
|------------------------------|---------|-------------------------------------------------------------------------------------------------------------------------------------------------------------------------------------------------------------------------------------------------------------------------------------------------------------------------------------------------------------------------------------------------------------------------------------------------------------------------------------------------------------------------------------------------------------------------------------------------------------------------------------------------------------------------------------------------------------------|
| <b>Title and abstract</b>    | 1       | (a) Indicate the study's design with a commonly used term in the title or the abstract <b>pages 2, 9</b><br>(b) Provide in the abstract an informative and balanced summary of what was done and what was found <b>page 2</b>                                                                                                                                                                                                                                                                                                                                                                                                                                                                                     |
| <b>Introduction</b>          |         |                                                                                                                                                                                                                                                                                                                                                                                                                                                                                                                                                                                                                                                                                                                   |
| Background/rationale         | 2       | Explain the scientific background and rationale for the investigation being reported <b>pages 3, 4</b>                                                                                                                                                                                                                                                                                                                                                                                                                                                                                                                                                                                                            |
| Objectives                   | 3       | State specific objectives, including any pre-specified hypotheses <b>page 2, 3</b>                                                                                                                                                                                                                                                                                                                                                                                                                                                                                                                                                                                                                                |
| <b>Methods</b>               |         |                                                                                                                                                                                                                                                                                                                                                                                                                                                                                                                                                                                                                                                                                                                   |
| Study design                 | 4       | Present key elements of study design early in the paper <b>page 3, 4</b>                                                                                                                                                                                                                                                                                                                                                                                                                                                                                                                                                                                                                                          |
| Setting                      | 5       | Describe the setting, locations, and relevant dates, including periods of recruitment, exposure, follow-up, and data collection <b>page 3, 4</b>                                                                                                                                                                                                                                                                                                                                                                                                                                                                                                                                                                  |
| Participants                 | 6       | (a) <i>Cohort study</i> —Give the eligibility criteria, and the sources and methods of selection of participants. Describe methods of follow-up<br><i>Case-control study</i> —Give the eligibility criteria, and the sources and methods of case ascertainment and control selection. Give the rationale for the choice of cases and controls<br><i>Cross-sectional study</i> —Give the eligibility criteria, and the sources and methods of selection of participants <b>page 3, 4</b><br>(b) <i>Cohort study</i> —For matched studies, give matching criteria and number of exposed and unexposed<br><i>Case-control study</i> —For matched studies, give matching criteria and the number of controls per case |
| Variables                    | 7       | Clearly define all outcomes, exposures, predictors, potential confounders, and effect modifiers. Give diagnostic criteria, if applicable <b>page 4, 9</b>                                                                                                                                                                                                                                                                                                                                                                                                                                                                                                                                                         |
| Data sources/<br>measurement | 8*      | For each variable of interest, give sources of data and details of methods of assessment (measurement). Describe comparability of assessment methods if there is more than one group <b>page 4</b>                                                                                                                                                                                                                                                                                                                                                                                                                                                                                                                |
| Bias                         | 9       | Describe any efforts to address potential sources of bias <b>N/A</b>                                                                                                                                                                                                                                                                                                                                                                                                                                                                                                                                                                                                                                              |
| Study size                   | 10      | Explain how the study size was arrived at <b>page 4</b>                                                                                                                                                                                                                                                                                                                                                                                                                                                                                                                                                                                                                                                           |
| Quantitative variables       | 11      | Explain how quantitative variables were handled in the analyses. If applicable, describe which groupings were chosen and why <b>page 4, 5</b>                                                                                                                                                                                                                                                                                                                                                                                                                                                                                                                                                                     |
| Statistical methods          | 12      | (a) Describe all statistical methods, including those used to control for confounding <b>page 5</b><br>(b) Describe any methods used to examine subgroups and interactions <b>page 5</b><br>(c) Explain how missing data were addressed <b>N/A</b>                                                                                                                                                                                                                                                                                                                                                                                                                                                                |

1  
2 (d) *Cohort study*—If applicable, explain how loss to follow-up was addressed

3 *Case-control study*—If applicable, explain how matching of cases and controls was  
4 addressed

5 *Cross-sectional study*—If applicable, describe analytical methods taking account of  
6 sampling strategy **N/A**

---

7  
8 (e) Describe any sensitivity analyses

9 Continued on next page

10  
11  
12  
13  
14  
15  
16  
17  
18  
19  
20  
21  
22  
23  
24  
25  
26  
27  
28  
29  
30  
31  
32  
33  
34  
35  
36  
37  
38  
39  
40  
41  
42  
43  
44  
45  
46  
47  
48  
49  
50  
51  
52  
53  
54  
55  
56  
57  
58  
59  
60

For peer review only

1  
2  
3  
4  
5  
6  
7  
8  
9  
10  
11  
12  
13  
14  
15  
16  
17  
18  
19  
20  
21  
22  
23  
24  
25  
26  
27  
28  
29  
30  
31  
32  
33  
34  
35  
36  
37  
38  
39  
40  
41  
42  
43  
44  
45  
46  
47  
48  
49  
50  
51  
52  
53  
54  
55  
56  
57  
58  
59  
60**Results**

|                  |     |                                                                                                                                                                                                                                                                                                                                                                                                                                           |
|------------------|-----|-------------------------------------------------------------------------------------------------------------------------------------------------------------------------------------------------------------------------------------------------------------------------------------------------------------------------------------------------------------------------------------------------------------------------------------------|
| Participants     | 13* | (a) Report numbers of individuals at each stage of study—eg numbers potentially eligible, examined for eligibility, confirmed eligible, included in the study, completing follow-up, and analysed <b>page 4</b><br>(b) Give reasons for non-participation at each stage <b>N/A</b><br>(c) Consider use of a flow diagram <b>N/A</b>                                                                                                       |
| Descriptive data | 14* | (a) Give characteristics of study participants (eg demographic, clinical, social) and information on exposures and potential confounders <b>page 4, 6</b><br>(b) Indicate number of participants with missing data for each variable of interest <b>N/A</b><br>(c) <i>Cohort study</i> —Summarise follow-up time (eg, average and total amount)                                                                                           |
| Outcome data     | 15* | <i>Cohort study</i> —Report numbers of outcome events or summary measures over time<br><i>Case-control study</i> —Report numbers in each exposure category, or summary measures of exposure<br><i>Cross-sectional study</i> —Report numbers of outcome events or summary measures <b>page 6-8</b>                                                                                                                                         |
| Main results     | 16  | (a) Give unadjusted estimates and, if applicable, confounder-adjusted estimates and their precision (eg, 95% confidence interval). Make clear which confounders were adjusted for and why they were included <b>page 5, 7</b><br>(b) Report category boundaries when continuous variables were categorized <b>N/A</b><br>(c) If relevant, consider translating estimates of relative risk into absolute risk for a meaningful time period |
| Other analyses   | 17  | Report other analyses done—eg analyses of subgroups and interactions, and sensitivity analyses <b>page 5</b>                                                                                                                                                                                                                                                                                                                              |

**Discussion**

|                  |    |                                                                                                                                                                                             |
|------------------|----|---------------------------------------------------------------------------------------------------------------------------------------------------------------------------------------------|
| Key results      | 18 | Summarise key results with reference to study objectives <b>page 6-8</b>                                                                                                                    |
| Limitations      | 19 | Discuss limitations of the study, taking into account sources of potential bias or imprecision. Discuss both direction and magnitude of any potential bias <b>page 9</b>                    |
| Interpretation   | 20 | Give a cautious overall interpretation of results considering objectives, limitations, multiplicity of analyses, results from similar studies, and other relevant evidence <b>page 8, 9</b> |
| Generalisability | 21 | Discuss the generalisability (external validity) of the study results <b>page 8, 9</b>                                                                                                      |

**Other information**

|         |    |                                                                                                                                                                              |
|---------|----|------------------------------------------------------------------------------------------------------------------------------------------------------------------------------|
| Funding | 22 | Give the source of funding and the role of the funders for the present study and, if applicable, for the original study on which the present article is based <b>page 10</b> |
|---------|----|------------------------------------------------------------------------------------------------------------------------------------------------------------------------------|

\*Give information separately for cases and controls in case-control studies and, if applicable, for exposed and unexposed groups in cohort and cross-sectional studies.

**Note:** An Explanation and Elaboration article discusses each checklist item and gives methodological background and published examples of transparent reporting. The STROBE checklist is best used in conjunction with this article (freely available on the Web sites of PLoS Medicine at <http://www.plosmedicine.org/>, Annals of Internal Medicine at <http://www.annals.org/>, and Epidemiology at <http://www.epidem.com/>). Information on the STROBE Initiative is available at [www.strobe-statement.org](http://www.strobe-statement.org).

# BMJ Open

## Correlates and Etiological Factors Associated with Hedonic Well-Being Among an Aging Population of US Men and Women: Secondary Data Analysis of a National Survey

|                                 |                                                                                                                                                                                                                                                                                                                                                                                                                          |
|---------------------------------|--------------------------------------------------------------------------------------------------------------------------------------------------------------------------------------------------------------------------------------------------------------------------------------------------------------------------------------------------------------------------------------------------------------------------|
| Journal:                        | <i>BMJ Open</i>                                                                                                                                                                                                                                                                                                                                                                                                          |
| Manuscript ID                   | bmjopen-2017-020962.R3                                                                                                                                                                                                                                                                                                                                                                                                   |
| Article Type:                   | Research                                                                                                                                                                                                                                                                                                                                                                                                                 |
| Date Submitted by the Author:   | 24-Sep-2018                                                                                                                                                                                                                                                                                                                                                                                                              |
| Complete List of Authors:       | Odlum, Michelle; Columbia University, School of Nursing<br>Davis, Nicole; Clemson University School of Nursing<br>Owens, Otis; University of South Carolina College of Social Work<br>Preston, Michael; University of Arkansas for Medical Sciences<br>Brewer, Russell ; University of Chicago, Medicine<br>Black, Danielle; Columbia University School of Nursing; Columbia University, Mailman School of Public Health |
| <b>Primary Subject Heading</b>: | Geriatric medicine                                                                                                                                                                                                                                                                                                                                                                                                       |
| Secondary Subject Heading:      | Mental health, Patient-centred medicine, Sociology                                                                                                                                                                                                                                                                                                                                                                       |
| Keywords:                       | Ageing, Well-being, Gender differences, Health-related Quality of Life                                                                                                                                                                                                                                                                                                                                                   |
|                                 |                                                                                                                                                                                                                                                                                                                                                                                                                          |

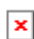

1  
2  
3 Correlates and Etiological Factors Associated with Hedonic Well-Being Among an Aging Population of US Men  
4 and Women: secondary data analysis of a national survey  
5

6 Michelle Odlum, EdD, MPH<sup>1</sup>, Nicole Davis, PhD, RN<sup>2</sup>, Otis Owens, PhD, MPH, Michael Preston, PhD, MPH<sup>4</sup>,  
7 Russell Brewer, DrPH, MPH<sup>5</sup>, and Danielle Black, MS, MPH<sup>6,1</sup>  
8

9 <sup>1</sup>Columbia University School of Nursing

10 <sup>2</sup>Clemson University School of Nursing

11 <sup>3</sup>University of South Carolina College of Social Work

12 <sup>4</sup>University of Arkansas for Medical Sciences

13 <sup>5</sup>University of Chicago Medicine

14 <sup>6</sup>Columbia University Mailman School of Public Health  
15

16  
17  
18 Corresponding Author: Michelle Odlum mlo12@columbia.edu 242 W 112<sup>th</sup> Street 5C New York, NY 10026  
19

20 **Author, addresses and affiliations:**

21  
22 Michelle Odlum, EdD, MPH  
23 Assistant Professor of Nursing  
24 Columbia University  
25 School of Nursing  
26 560 W 168 Street  
27 New York, NY, 10032  
28 347-806-2090  
29

30  
31 Nicole Davis, PhD, RN  
32 Assistant Professor of Nursing  
33 Clemson University  
34 School of Nursing  
35 University Center of Greenville  
36 225 S. Pleasantburg Drive, Suite B-5  
37 Greenville, SC 29607  
38 770-639-1501  
39

40 Otis Owens, PhD, MPH  
41 Assistant Professor  
42 University of South Carolina  
43 College of Social Work  
44 1512 Pendleton St.  
45 Columbia, SC 29208  
46 901-218-2852  
47

48 Michael Preston, PhD, MPH  
49 Assistant Professor  
50 University of Arkansas for Medical Sciences  
51 4301 W Markham St  
52 Little Rock, AR 72205  
53 501-526-7101  
54  
55  
56  
57  
58  
59  
60

Russell Brewer, DrPH, MPH  
Research Associate Professor  
University of Chicago Medicine  
5837 S. Maryland Ave.  
Chicago, IL 60637  
504-301-9825

Danielle Black, MA, MPH  
Graduate Research Assistant  
Columbia University  
School of Nursing  
617 W 168 Street  
New York, NY, 10032  
910-547-4907

## ABSTRACT

**Objective.** To understand the gender-specific factors that uniquely contribute to successful aging in a US population of men and women, 57-85 years of age. This was achieved through the examination of the correlates of subjective well-being defined by health-related quality of life (HRQoL), across several biological and psychosocial determinants of health.

**Design.** Cross sectional study

**Setting.** The NSHAP (National Social Life, Health and Ageing Project, 2010-11) a representative sample of the US population.

**Participants.** 3,377 adults aged 57 to 85 (1538 men, 1839 women) from the NSHAP.

**Main outcome measures.** The bio-psychosocial factors of Biological/Physiological Function, Symptom Status, Functional Status, General Health Perceptions and HRQoL-happiness.

**Method.** HRQoL was measured using the NSHAP Wave 2 multistage, stratified area probability sample of US households (N=3,377). Variable selection was guided by the Wilson's and Cleary's Model (WCM) that classifies health outcomes at five main levels and characteristics.

**Results.** Our findings indicate differences in bio-psychosocial factors comprised in the WCM and their relative importance and unique impact on HRQoL by gender. Women reported significantly lower HRQoL than men ( $t=3.5$ ,  $df=3366$ ). The most significant contributors to HRQoL in women were mental health ( $B=0.31$ ; 0.22, 0.39), loneliness ( $B=-0.26$ ; -0.35, -0.17), urinary incontinence ( $B=-0.22$ ; -0.40, -0.05) and support from spouse/partner ( $B=0.27$ ; 0.10, 0.43), and family ( $B=0.12$ ; 0.03, 0.20). Men indicated mental health ( $B=0.21$ ; 0.14, 0.29), physical health ( $B=0.17$ ; 0.10, 0.23), functional difficulties ( $B=0.38$ ; 0.10, 0.65), loneliness ( $B=-0.20$ ; -0.26, -0.12), depression ( $B=-0.36$ ; -0.58, -0.15) and support from friends ( $B=0.06$ ; 0.10, 0.11) as significant contributors. Those with greater social support had better HRQoL ( $F=4.22$ ,  $df=4$ ). Lack of companionship and reliance on spouse/partner were significant HRQoL contributors in both groups.

**Conclusion.** Our findings offer insight into aging, gender and subjective well-being. The results provide an opportunity to identify bio-psychosocial factors to inform interventions to support successful aging.



### Article Summary: Strengths and limitations of this study

- A variety of bio-psychosocial factors that contribute to well-being by gender were compared, where prior studies have not used gender as an independent variable.
- Effect sizes were used to summarize our regression analyses for a manageable and clinically interpretable picture of the unique contribution of gender across the comprehensive Wilson Cleary Model's (WCM), linking bio-psychosocial factors to overall well-being defined as Health Related Quality of Life - happiness.
- We were unable to establishing a cause-effect relationship or to determine changes in perceptions over time based on our cross-sectional analysis.
- We were limited to define the WCM levels based on variables in the NSHAP; yet with the variety of indicators captured in the NSHAP, this was a minor limitation.
- Beyond identified limitations, results mirrored prior research and contributed to the understanding of HRQoL gender-based differences, while controlling for potential confounders including age, race/ethnicity and socioeconomic status.

## INTRODUCTION

Successful aging was traditionally defined as the absence of disease and associated functional limitations.<sup>1</sup> However, the definition has shifted to a multidimensional view that accounts for psychosocial and cultural aspects of health and health related quality of life (HRQoL).<sup>1,2</sup> This shift in definition is driven by patient center care, patient empowerment and shared decision making with providers in the healthcare setting.<sup>2</sup> In fact, HRQoL is now viewed as an important complement to biomedical measures of health.<sup>3</sup> An important indicator of successful aging is subjective well-being, an aspect of HRQoL. Subjective well-being, is a direct predictor of health outcomes affecting biological, physical, and psychosocial changes in older adults.<sup>4,5</sup> Improvements in population-level well-being is an aspiration of society, sparking policy and economic debates.<sup>6</sup> Studies of life satisfaction have shown that subjective well-being is affected by a multitude of additional factors, including social and familial relationships. These additional factors may be protective, potentially decreasing or eliminating the chronic disease and symptom burden.<sup>6</sup>

Three approaches exist to capture subjective well-being; these are life evaluation (e.g., life satisfaction); hedonic well-being (e.g., experienced happiness, anger); and eudemonic well-being (e.g., life meaning and purpose).<sup>6</sup> Researchers suggest subjective well-being as a measure for healthcare resources allocation. Therefore, the need exists to further identify and understand the factors associated with successful aging.<sup>2,7</sup> It is also essential to compare these factors between men and women to determine the unique contribution of gender.<sup>2</sup> Evidence to date remains unclear as prior studies of gender differences have focused on specific chronic diseases or on socioeconomic and demographic factors, usually controlling for gender as a potential confounder and not as an independent variable.<sup>8</sup> Therefore, we sought to identify the correlates and etiological factors associated with hedonic well-being, specifically feelings of happiness, through a bio-psychosocial lens, accounting for gender variability, in an aging population of US adults. Happiness, served as a proxy for HRQoL. It is a measure of life satisfaction, the absence or presence of desirable or undesirable feelings or experiences. It is proven useful in the analysis of HRQoL.<sup>9</sup>

Guided by the Wilson's and Cleary's Conceptual Model (WCM), Figure 1 we analyzed the National Social Life, Health and Aging Project (NSHAP), second wave data. We examined whether objective (e.g., biological/physiological) and self-perceived measures (e.g., functional status) of health explain gender differences in HRQoL (i.e., happiness). Self-rated perceptions of health have been observed to correlate with other health indicators including morbidity.<sup>10</sup> We determined the models predicting the HRQoL of male and female US adults ages 57 to 85.<sup>11</sup> We explored the extent to which the WCM levels interact to predict HRQoL and provide greater insight into aging. The bio-psychosocial WCM was selected for our analysis as it considers health outcomes on a continuum of increasing complexity and health trajectories associated with aging. It is also shown to enhance knowledge about HRQoL in diverse populations.<sup>11</sup> The model classifies health outcomes at five main levels.<sup>11</sup> The first level Biological/Physiological function, examines the individual as a whole. Symptoms (level 2), are the perceptions of physical, emotional, and cognitive states. Symptoms are considered significant determinants of Functional Status (level 3), with biological and symptom variables evidenced to be correlated with Functional Status. General Health Perceptions (level 4) are subjective appraisals of health and Overall Quality of Life (level 5) as a whole.<sup>11</sup> Variables that comprise each level interact in complex ways to determine HRQoL. Arrows linking the five main levels indicate dominant causal relationships. In addition, the five main levels are influenced by individual (e.g., age, education) and environmental characteristics (e.g., social support).<sup>11</sup> Studies of hedonic states, including happiness, have predicted morbidity and mortality. However, confounding factors indicate that well-being is coupled with additional factors such as education.<sup>10</sup> The WCM controls for potential confounding. Additionally, different than prior studies that compared the quantified HRQoL scores across gender, we identified the hierarchical differences of each WCM level and their weighted contribution to HRQoL (happiness).

## METHODS

**Participants.** The second wave of the NSHAP survey, a National sample of US adults ages 57 to 85, was utilized in our analysis, was conducted from 2010-2011.<sup>12</sup> The survey focused on exploring interpersonal connections and overall health outcomes as they relate to: culture, gender and socioeconomic status; health behaviors; health care utilization, social support, and well-being.<sup>12</sup> Our current study utilized Wave 2 data to explore the relationship between the WCM constructs for both men and women. Wave 2, with its large sample size (N=3,377) and strong methodology, allowed us to systematically investigate important aspects of HRQoL and aging.

**Measures.** NSHAP variables used in our analysis were selected based on best fit with the WCM constructs. Thirty variables were selected. We categorized the five main levels and characteristics of the WCM under two overarching categories of Objective and Subjective health indicators, Figure 1. The Objective indicators of the first main level of Biological/Physiological Function were, categorical: Body Mass Index (BMI), and continuous: average pulse rate, and average blood pressure (systolic and diastolic). The last four main levels of the WCM comprised Subjective health indicators. These included the assessment of participant perceptions of health outcomes on both individual and societal levels. Variables that comprised Symptom Status were categorical: pain, pain level, fatigue, urinary incontinence, stool incontinence and continuous: depression, anxiety. Variables that comprised Functional Status were categorical: physical function difficulty, companionship and feeling left out or isolated and continuous: perceptions of control. Variables that comprised General Health Perceptions were continuous self-rated physical and mental health.

Our continuous outcome variable of interest for HRQoL in this study was defined by hedonic well-being: self-rated happiness, asked participants thoughts and feelings about their life overall. The WCM also accounts for important individual and environment influences directly impacting objective and subjective indicators. Variables that comprise Individual Characteristics were categorical: insurance coverage, age group, education, race/ethnicity, and provider visits. Variables that comprise Environmental Characteristics were categorical: marital status, reliance on spouse/partner, relatives and friends, and number of close family/relatives and friends.

**Statistical analysis.** The association between HRQoL (i.e., happiness) and the constructs of the WCM were examined in separate analyses for male and female participants. Descriptive statistics were conducted to characterize the sample and variable distributions. Participant characteristics were summarized with means and standard deviations for continuous variables and percentages and frequencies for categorical variables. Individual and environmental characteristics were also examined for potential confounding. Correlations were calculated to determine the relationship between the WCM construct and characteristic variables and reported HRQoL by participants. Bivariate analysis was conducted. Chi square analyses were used to assess differences in categorical variables and T-tests in continuous variables, by gender. Linear regression analyses were performed to assess the relevant importance of significantly correlated variables that potentially contribute to HRQoL. For model validation, our dataset was randomly divided, using a split-sample technique, into a developmental: n=1689 and validation: n=1688 group before identifying final model variables.<sup>13</sup> The development model was selected through a stepwise multiple regression to identify the model of best fit. To determine the accuracy of the developmental model, a regression model was calculated with the validation dataset for the retained variables. To choose the final model, adjusted R<sup>2</sup> values, Standardized  $\beta$ s and unstandardized slopes (B) were observed between the developmental and validation models to ensure analytic comparability. Variables with significant differences (p<0.05) were retained for additional analysis.

Two independent stepwise multiple regressions were then performed based on gender (i.e., men and women) to identify variables, by gender, best associated with HRQoL. Retained variables were ranked by partial R<sup>2</sup> order to determine their relative contribution. Effect sizes were also estimated for each retained variable with t-values corresponding to the coefficient estimates divided by the associated standard errors. To identify constructs with the most consistent associations with HRQoL, effect sizes and R<sup>2</sup> rankings were averaged per WCM construct for men and women. Data analysis was conducted with use of SPSS 22.0. The stepwise approach allows for the prevention of bias in the selection of variables in the final model.<sup>14 15</sup>

**Table 1. Demographic Characteristics of Participants (N=3,377)**

|                                   | <i>N</i> | <i>(%)</i> |
|-----------------------------------|----------|------------|
| <b>Gender</b>                     |          |            |
| <b>Men</b>                        | 1538     | 45.5       |
| 69 or Under                       | 585      | 38.0       |
| 70-79                             | 610      | 39.7       |
| 80 or older                       | 343      | 22.3       |
| <b>Women</b>                      | 1839     | 54.5       |
| 69 or Under                       | 812      | 44.2       |
| 70-79                             | 633      | 34.4       |
| 80 or older                       | 394      | 21.4       |
| <b>Race</b>                       |          |            |
| <b>Men</b>                        |          |            |
| non-Black, non-Hispanic           | 1147     | 74.6       |
| Black or African American         | 217      | 14.1       |
| non-Black Hispanics               | 174      | 11.3       |
| <b>Women</b>                      |          |            |
| non-Black, non-Hispanic           | 1346     | 73.2       |
| Black or African American         | 300      | 16.3       |
| non-Black Hispanics               | 193      | 10.5       |
| <b>Education</b>                  |          |            |
| <b>Men</b>                        |          |            |
| more than High School             | 884      | 57.5       |
| High School or less               | 654      | 42.5       |
| <b>Women</b>                      |          |            |
| more than High School             | 1015     | 55.2       |
| High School or less               | 824      | 44.8       |
| <b>Insurance Coverage</b>         |          |            |
| <b>Men</b>                        |          |            |
| Medicaid-Medicare                 | 1080     | 83.9       |
| Private                           | 161      | 12.5       |
| None                              | 46       | 3.6        |
| <b>Women</b>                      |          |            |
| Medicaid-Medicare                 | 1227     | 79.1       |
| Private                           | 250      | 16.1       |
| None                              | 75       | 4.8        |
| <b>Marital Status</b>             |          |            |
| <b>Men</b>                        |          |            |
| Married                           | 1201     | 78.1       |
| Not currently Married             | 337      | 21.9       |
| <b>Women</b>                      |          |            |
| Married                           | 1085     | 59.0       |
| Not currently Married             | 754      | 41.0       |
| <b>Partnership if non-Married</b> |          |            |
| <b>Men</b>                        |          |            |
| No                                | 231      | 77.5       |
| <b>Women</b>                      |          |            |
| No                                | 659      | 93.1       |

**Patient Involvement.** As an analysis of secondary data, no participants were not involved in the development of our research questions or with the analysis of the outcome measures. Additionally, participants were not involved with the interpretation of data or the writing of our analytic findings. Dissemination of analytic findings to study participants or members of their associated communities will not be accomplished.

**Table 2. Independent Samples T-tests and  $X^2$  for Wilson Cleary Model construct-specific variables with Men and Women ( $N=3,377$ )**

|                                          |                                         | Men        | Women      | $X^2/T$ -test | df   |
|------------------------------------------|-----------------------------------------|------------|------------|---------------|------|
| BIOLOGICAL/<br>PHYSIOLOGICAL<br>FUNCTION | BMI (normal)                            | 36.5%      | 63.5%      | 29.0**        | 2    |
|                                          | Diastolic average                       | 79.0±12.0  | 81.0±11.5  | -6.4**        | 3255 |
|                                          | Systolic Average                        | 138.0±20.7 | 137.0±21.0 | 1.6           | 3255 |
|                                          | Pulse Average                           | 67.7±12.1  | 69.8±11.2  | -5.1**        | 3035 |
| SYMPTOM STATUS                           | Pain                                    | 43.8%      | 56.2%      | 8.9**         | 1    |
|                                          | Pain: level (no pain)                   | 50.0%      | 50.0%      | 11.2          | 6    |
|                                          | Depression(CESD total) <sup>1</sup> §   | 1.8±0.3    | 2.0±0.4    | -6.6**        | 3312 |
|                                          | Anxiety (HADS total) <sup>2</sup> §     | 1.8±0.5    | 1.8±0.4    | -0.8          | 2627 |
|                                          | Fatigue                                 | 54.7%      | 45.3%      | 3.1           | 3    |
|                                          | Urinary Incontinence§                   | 30.2%      | 69.8%      | 94.7**        | 1    |
|                                          | Stool Incontinence                      | 30.4%      | 69.6%      | 15.5**        | 1    |
| FUNCTIONAL<br>STATUS                     | No Physical Function Difficulty§        | 46.1%      | 53.9%      | 27.1          | 16   |
|                                          | Perceptions of Control                  | 2.3±0.5    | 2.2±0.6    | 2.7**         | 2665 |
|                                          | Companionship§                          | 49.8%      | 50.2%      | 21.0**        | 3    |
|                                          | Feel left Out                           | 54.0%      | 46.0%      | 3.1           | 3    |
|                                          | Feel Isolated§                          | 55.8%      | 44.2%      | 1.5           | 3    |
| GENERAL HEALTH<br>PERCEPTIONS            | Self-rated physical health§             | 3.2±1.1    | 3.2±1.0    | -0.7          | 3370 |
|                                          | Self-rated mental health§               | 3.7±1.0    | 3.6±1.0    | 3.2**         | 3372 |
| INDIVIDUAL<br>CHARACTERISTICS            | Insurance                               | 96.4%      | 95.2%      | 10.95**       | 1    |
|                                          | Age Category ( $\geq 70$ )              | 62%        | 55.8%      | 14.1**        | 1    |
|                                          | Education (> HS)§                       | 57.5%      | 55.2%      | 1.78          | 1    |
|                                          | Race/Ethnicity (non-Black non-Hispanic) | 74.6%      | 73.2%      | 3.39          | 1    |
|                                          | Seen the doctor in last year§           | 3.0±1.5    | 3.04±1.5   | -1.28         | 3367 |
| ENVIRONMENTAL<br>CHARACTERISTICS         | Rely on family                          | 36.9%      | 63.1%      | 42.14**       | 3    |
|                                          | Has close family/relatives§             | 38.6%      | 61.4%      | 52.05**       | 5    |
|                                          | Rely on friends                         | 44.3%      | 55.7%      | 71.78**       | 3    |
|                                          | Has friends§                            | 44.9%      | 55.1%      | 13.12*        | 5    |
|                                          | Rely on spouse/partner§                 | 63.3%      | 36.70%     | 26.92**       | 3    |

Note. \*\*p < 0.01, \*p < 0.05; <sup>1</sup>Center for Epidemiological Studies Depression (CESD); <sup>2</sup>Hospital Anxiety and Depression Scale (HADS)

§Variables that comprise the validated regression model and retained for subsequent gender-related regression analysis.

## RESULTS

A total of 3,377 participants were included in the analysis. The majority of participants (54.5%) were women. The largest percentage of men were in the 70-79 age group (39.7%) with the largest percentage of women in the 69 and under age group (44.2%). The sample was predominantly non-Black, non-Hispanic (73.8%,  $N=2493$ ). Most participants had at least a high school education (56.2%,  $N=1899$ ). More than two-thirds were married (67.7%,  $N=2286$ ). Of those who indicated they were unmarried, 88.5% ( $N=890$ ) were not in any romantic, intimate, or sexual partnerships. More than two-thirds had health care coverage in the form of Medicaid, Medicare, or a combination of both (81.3%,  $N=2307$ ). Tables 1 and 2 provides a breakdown of the demographic characteristics

and significant differences for variables that comprise the WCM constructs for men and women. Table 3 describes the baseline characteristics of the development and validation cohorts.

**Table 3. Characteristics of the Developmental and Validation Models Wilson Cleary Model Construct-Specific Variables**

| Construct-Specific Variables  | Developmental Cohort (N=1689)        |             |         | Validation Cohort (N=1688) |             |         |              |
|-------------------------------|--------------------------------------|-------------|---------|----------------------------|-------------|---------|--------------|
|                               | Descriptives                         | $\beta$     | 95% CI  | Descriptives               | $\beta$     | 95% CI  |              |
| SYMPTOM STATUS                | Depression (CESD total) <sup>1</sup> | 1.9 ± .34   | -.111*  | -.537, -.061               | 1.9 ± .35   | -.099** | -.447, -.094 |
|                               | Anxiety (HADS total) <sup>2</sup>    | 1.8 ± .45   | -.201** | -.499, -.291               | 1.8 ± .45   | -.212** | -.563, -.270 |
|                               | Urinary Incontinence                 | 0.42        | -.070*  | -.112, .076                | 0.43        | -.059*  | -.238, .028  |
| FUNCTIONAL STATUS             | No Physical Function Difficulty      | 0.72        | -.102** | -.288, -.118               | 0.72        | -.107** | -.181, -.045 |
|                               | Companionship                        | 0.39        | -.168** | -.238, -.075               | 0.40        | -.166** | -.207, -.129 |
|                               | Feel Isolated                        | 0.27        | -.146** | -.240, -.060               | 0.26        | -.148** | -.229, -.113 |
| GENERAL HEALTH PERCEPTIONS    | Self-rated physical health           | 3.22 ± 1.05 | .121*   | .021, .175                 | 3.19 ± 1.07 | .123**  | .061, .110   |
|                               | Self-rated mental health             | 3.62 ± .96  | .244**  | .126, .283                 | 3.62 ± .99  | .240**  | .153, .272   |
| INDIVIDUAL CHARACTERISTICS    | Education (> HS)                     | 0.58        | .074*   | -.003, .281                | 0.58        | .068*   | -.025, .180  |
|                               | Seen the doctor in last year         | 3.06 ± 1.5  | -.099** | -.093, -.027               | 2.97 ± 1.5  | -.105** | -.081, -.042 |
| ENVIRONMENTAL CHARACTERISTICS | Has close family/relatives           | 0.98        | .122**  | .059, .150                 | 0.98        | .123**  | .061, .110   |
|                               | Has friends                          | 0.97        | .079*   | -.001, .105                | 0.97        | .066*   | -.010, .136  |
|                               | Rely on spouse/partner               | 0.96        | .130**  | .094, .357                 | 0.97        | .134*   | .138, .330   |

Note. \*\*p < 0.01, \*p < 0.05; <sup>1</sup>Center for Epidemiological Studies Depression (CESD); <sup>2</sup>Hospital Anxiety and Depression Scale (HADS)

Bivariate correlation analyses were initially conducted to examine the associations between the outcome HRQoL variable and those that comprised the WCM constructs. For men, of the original 30 variables, bivariate correlation analysis led to the elimination of six variables (24 remaining), for women the elimination of seven variables (23 remaining). All significantly correlated variables that comprised the WCM constructs and characteristics were then validated by linear regression, reducing the variable list from 24 to 13 (Table 2), for final model development by gender. HRQoL happiness scores were compared by the total scores for men, women and participants combined across the categorized age groups (69 or younger, 70-79, 80 or older). Significant results were observed across age groups for combined participants ( $X^2=18.6$ ,  $p=.017$ ) and for women ( $X^2=20.1$ ,  $p=.010$ ), both having significantly lower HRQoL score with increasing age.

**Table 4. WCM Constructs and HRQoL Outcomes**

|                               | Partial R <sup>2</sup> | Partial R <sup>2</sup> Rank | Effect Size (t-value) | Average R <sup>2</sup> Ranks | Average Effect Sizes (t-values) |
|-------------------------------|------------------------|-----------------------------|-----------------------|------------------------------|---------------------------------|
| <b>MEN</b>                    |                        |                             |                       |                              |                                 |
| GENERAL HEALTH PERCEPTIONS    | 0.24, 1.8              | 1, 3                        | 8.3, 5.9              | 2                            | 7.1                             |
| FUNCTIONAL STATUS             | 0.21, .07              | 2, 6                        | 7.2, 2.2              | 4                            | 4.7                             |
| SYMPTOM STATUS                | 0.14                   | 4                           | 4.8                   | 4                            | 4.8                             |
| ENVIRONMENTAL CHARACTERISTICS | 0.09                   | 5                           | 3.0                   | 5                            | 3.0                             |
| <b>WOMEN</b>                  |                        |                             |                       |                              |                                 |
| GENERAL HEALTH PERCEPTIONS    | 0.39                   | 1                           | 9.4                   | 1                            | 9.4                             |
| FUNCTIONAL STATUS             | 0.33                   | 2                           | 7.9                   | 2                            | 7.9                             |
| SYMPTOM STATUS                | 0.03                   | 5                           | 0.68                  | 5                            | 0.68                            |
| ENVIRONMENTAL CHARACTERISTICS | 0.16, 0.12             | 3, 4                        | 3.6, 2.6              | 3.5                          | 3.09                            |

Separate linear regression analyses were conducted for men and women. Partial R<sup>2</sup> were ranked from 1 (most important) to 5 (least important) for men and women separately, with significant variables identified. Additionally,



the last two columns on Table 4 contain the average of the  $R^2$  ranking and the average effect sizes. The highest ranking variable for overall HRQoL happiness for men was General Health Perceptions (self-rated: mental health and physical health), Symptom Status (CESD- Depression score) and Functional Status (Lack companionship) both ranked second based on  $R^2$  ranks, with Symptom Status having a greater average effect size. Physical Function Difficulty and Environmental Characteristics (Rely on spouse/partner) were last. Our regression analyses identified variables that, in the presence of all others, make a unique and direct contribution to HRQoL happiness.<sup>10</sup> The highest ranking variable for overall HRQoL for women was General Health Perceptions (mental health), followed by Functional Status (Lack of Companionship), Environmental Characteristics (Rely on spouse/partner and Number of close family members) and Symptom Status (urinary incontinence). The hierarch of contributing WCM constructs to overall HRQoL are ranked for men and women, Table 5.

**Table 5. Hierarch of HRQoL Contributors based on Average Effect Sizes**

| Rank         | Item Descriptions             |                                                   |
|--------------|-------------------------------|---------------------------------------------------|
| <b>MEN</b>   |                               |                                                   |
| 1st          | GENERAL HEALTH PERCEPTIONS    | Self-rated: mental health and physical health     |
| 2nd          | SYMPTOM STATUS                | Depression                                        |
| 3rd          | FUNCTIONAL STATUS             | Lack companionship, Physical Function Difficulty  |
| 4th          | ENVIRONMENTAL CHARACTERISTICS | Number of close friends                           |
| <b>WOMEN</b> |                               |                                                   |
| 1st          | GENERAL HEALTH PERCEPTIONS    | Self-rated: mental health                         |
| 2nd          | FUNCTIONAL STATUS             | Lack companionship                                |
| 3rd          | ENVIRONMENTAL CHARACTERISTICS | Rely on spouse/partner and Number of close family |
| 4th          | SYMPTOM STATUS                | Urinary Incontinence                              |

## DISCUSSION

Understanding subjective well-being and its association with health in older adults is still in its early stages. Consequently, the extent to which a variety of bio-psychosocial factors attribute to well-being and account for gender-related differences remain unclear. To explore this further, we utilized the WCM which offers the most comprehensive view of pathways linking the most relevant bio-psychosocial variables to overall well-being defined as HRQoL happiness.<sup>2,11,16,17</sup> Epidemiologic studies of happiness have predicted long term morbidity and mortality. Previous studies have shown that subjective well-being is not universal across populations, yet Individual Characteristics including, education and race/ethnicity, did not significantly contribute to HRQoL happiness in our population.<sup>10</sup> Our results did however, identify significant differences between men and women in the type and contribution of bio-psychosocial factors to HRQoL happiness. The overall models allowed for us to observe the interplay between various aspects of aging by gender.<sup>11</sup>

### Mechanisms and Implications

Women reported significantly lower HRQoL than men. Our findings also indicated a significant decrease in HRQoL as age increased for the entire sample and for women. A decrease in HRQoL was also observed for men, but the results were not significant. Previous studies have identified lower HRQoL in populations of older women. It is hypothesized that gender-related differences in HRQoL of older adults may be in their perceptions of symptoms and illness progression, with men being less focused on symptom recognition until they are severe.<sup>8</sup> Interestingly, although there were no significant differences in perceptions of physical health between men and women in our analysis, it was the greatest contributor of HRQoL in men. Similarly, the third greatest contributor to HRQoL in men was the Functional Status level factor Physical Function Difficulty, also not observed in women. Prior studies have indicated that functional difficulty generally comprise the majority of an individual's functional health status, which in our study again was only associated with men. This is an interesting finding and may be attributed to the increased likelihood of men suffering from more severe and life threatening chronic conditions than women.<sup>8</sup> Instead, women are more likely to suffer from non-life threatening diseases including autoimmune disorders.<sup>8</sup> Social support significantly contributed to HRQoL in both men and women. The lack of companionship

under the Functional Status level was significant in both groups. These findings align with the literature on loneliness in older ages and its adverse effects on HRQoL.<sup>18,19</sup> The reduction of inter-generational living and greater geographic expansion, has increased the report of loneliness in populations of older adults. Loneliness directly increases the likelihood of chronic diseases and all-cause mortality.<sup>18,19</sup> In our sample, the number of close family members was seen a significant contributor to HRQoL for women only. Having close family members may be more important to women, with 41 percent of the female sample reported being unmarried, only 21.9 percent of men. Additionally, HRQoL scores were significantly higher for married women. For those who reported being unmarried with a romantic, intimate, or sexual partner, men were significantly higher at 22.5 percent and women at 6.9 percent. Participants who reported greater social support from partners and relatives had higher HRQoL. Unhealthy familial relationships were predictors of loneliness in a prior study, particularly for the unmarried.<sup>18,19</sup> Their findings identify family ties as the most significant contributor to loneliness.<sup>18,19</sup> This aligns with our findings as women who reported a greater number of reliable family members had significantly higher HRQoL scores. Therefore, the need exists for the consideration of social networks<sup>20,21</sup> and their impact on HRQoL in risk assessment and intervention development to improve aging-related outcomes. Previous studies have also shown that men and women who were satisfied with their family relationship had 1.8 and 3.0 times higher odds of good HRQoL, respectively. Frequent contacts and visits with friends or family motivate the participation in activities and increase HRQoL.<sup>21,22</sup>

The highest level significant contributor to HRQoL in both men and women was the General Health Perceptions level which both comprised of mental health. In fact, those who reported better mental health outcomes reported higher HRQoL. Men reported better mental health at a significantly higher level than women. Yet, depression was the only significant factor for the Symptom Status level in men alone and was the second highest contributor to their HRQoL. Other studies have shown that mental health concerns and symptoms of depression significantly impact HRQoL.<sup>2,11,23</sup> Our findings align with the literature on depression, with depression in women reported to be higher.<sup>16,24,2,11,25-28</sup> In fact, in our sample, depression scores for women were significantly higher than for men. Yet, depression was a major contributor to HRQoL only in men. Studies have shown that unmarried men have lower HRQoL compared to married men. Our findings show significantly higher depression scores for married men in our sample. Those who reported having demanding or critical spouses or did not spend much time with their spouses had significantly higher Depression scores. Though not significant in the hierarchical model, women with demanding and critical spouses also reported significantly higher depression scores. These results further reinforce our findings that relationship quality is a major contributor to HRQoL. Urinary incontinence was the only significant factor in the Symptom Status level for women. Those with urinary incontinence had significantly lower HRQoL scores. Our findings align with the literature, with recent studies indicating that women were more likely to report urinary incontinence and impaired HRQoL.<sup>29,30</sup> Additionally, pelvic organ prolapse (POP), which often peaks for women in their seventies, include the symptoms of urinary incontinence. Studies have shown significantly impaired quality for women with POP over the age of 50.<sup>31</sup> Symptomatic POP is evidenced to have a tremendous impact on general health-related quality of life and similar to disabilities, it can contribute to physical immobility, pain, diminished energy, sleep disturbance, emotional instability and social isolation.<sup>31</sup> Studies have also shown that self-image is considered to be more important to women than men. In fact, in a study comparing HRQoL indicators between older men and women, a positive attitude about oneself was ranked in the top ten only for women.<sup>32,33</sup> Urinary incontinence may impact self-image, increasing the likelihood of depression and social isolation. Our findings indicate women who report urinary incontinence had significantly higher Depression scores; consistent with the higher likelihood of Depression and anxiety disorders in women compared to men.<sup>8</sup>

### Strengths and limitations

Our analysis was based on a cross-sectional, single wave (Wave 2) of the NSHAP data and does not allow for establishing a cause-effect relationship or the determination of changes in perceptions over time. Our analysis is also limited to define the WCM levels based on variables included in the NSHAP, a limitation inherent to secondary data analysis. However, with the variety of indicators that comprise the NSHAP, this was a minor limitation.

Variables that may indirectly impact HRQoL are not identified, yet our analytic approach provides a minimum collection of variables necessary to begin the development of structural equation models to observe directional

relationships. In fact, our regression approach identified the variables that make a distinct and direct contribution to HRQoL. Furthermore, our model validation increased our confidence in the predictive validity of the models. HRQoL was measured with one item of self-reported happiness in the NSHAP. Our single item analysis may be considered less sensitive than the use of other HRQoL measures or validated tools. Yet, beyond the identified limitations, our study findings mirrored and reinforce prior research and further contributed to understanding HRQoL differences between older men and women while adjusting for confounders including age, race/ethnicity and socioeconomic status.

### Conclusions and implications

The current analysis provides additional evidence to support insight into subjective well-being as it relates to successful aging. The findings of our analysis enhances our understanding of the bio-psychosocial factors that impact the HRQoL of older men and women. Our results add to the literature on successful aging in addition to the utility of the WCM in understanding the impact of HRQoL based on a variety of associated factors that comprise the models levels. We observed both similarities and differences between men and women based on the levels that best contribute to HRQoL. Further investigation is needed to determine the causal factors of the identified relationships between WCM levels and HRQoL. Other indicators of subjective well-being (e.g., life evaluations and eudemonic well-being) must also be assessed for collaborative care informed by mental and physical health.<sup>10</sup> In addition to informing the development of effective interventions to improve well-being independent of morbidity, income and other aging related factors that have adversely contributed to poor health outcomes.

**Contributors:** All authors assisted in the interpretation of data, the drafting and revising of important intellectual content and manuscript approval. The first author (MO) designed the work and analyzed the data. All authors assisted substantially in the data interpretation (MO, ND, OO, MP, RB), manuscript drafting (MO), revising for important intellectual content (MO, ND, OO, MP, RB, DB), final manuscript approval (MO, ND, OO, MP, RB, DB) and agreed accountability for all aspects of this work (MO, ND, OO, MP, RB, DB).

**Funding:** The National Social Life, Health and Aging Project is supported by the National Institute on Aging of the National Institutes of Health (R37AG030481; R01AG033903). The content is the responsibility of the authors and does not necessarily represent the official views of the National Institutes of Health.

**Competing Interests:** Authors have completed the Unified Competing Interest form at [http://www.icmje.org/coi\\_disclosure.pdf](http://www.icmje.org/coi_disclosure.pdf) (available upon request from the corresponding author) and declare that (1) our authors had no involvement with any company in the submission of this work; (2) our authors have no relationships with any companies that might be interested in the work that has been submitted in the previous 3 years; (3) our authors spouses, partners, or children have no financial relationships relevant to the work that has been submitted; and (4) our authors have no non-financial interests relevant to the work that has been submitted.

**Ethical approval:** The NSHAP data analysis was carried out with de-identified, unrestricted Wave 2 Public Use File v1 designed for public dissemination. This dataset is appropriate for preliminary analyses and for the exploration of health and functioning of older American adults.

**Data sharing:** Wave 2 Public Use File v1 data for the National Social Life Health and Aging Project are available at <http://www.icpsr.umich.edu/icpsrweb/NACDA/studies/34921>.

## REFERENCES

1. Topaz M, Troutman-Jordan M, MacKenzie M. Construction, Deconstruction, and Reconstruction: The Roots of Successful Aging Theories. *Nurs Sci Q*. 2014;27(3):226-233.
2. Zubritsky C, Abbott KM, Hirschman KB, Bowles KH, Foust JB, Naylor MD. Health-related quality of life: expanding a conceptual framework to include older adults who receive long-term services and supports. *Gerontologist*. 2013;53(2):205-210.
3. Haraldstad K, Rohde G, Stea TH, et al. Changes in health-related quality of life in elderly men after 12 weeks of strength training. *Eur Rev Aging Phys Act*. 2017;14:8.
4. Chambers LA, Wilson MG, Rueda S, et al. Evidence informing the intersection of HIV, aging and health: a scoping review. *AIDS Behav*. 2014;18(4):661-675.
5. Lim JW, Gonzalez P, Wang-Letzkus MF, Ashing-Giwa KT. Understanding the cultural health belief model influencing health behaviors and health-related quality of life between Latina and Asian-American breast cancer survivors. *Support Care Cancer*. 2009;17(9):1137-1147.
6. Banerjee S. Multimorbidity—older adults need health care that can count past one. *The Lancet*. 2015;385(9968):587-589.
7. Lopez-Otin C, Blasco MA, Partridge L, Serrano M, Kroemer G. The hallmarks of aging. *Cell*. 2013;153(6):1194-1217.
8. Cherepanov D, Palta M, Fryback DG, Robert SA. Gender differences in health-related quality-of-life are partly explained by sociodemographic and socioeconomic variation between adult men and women in the US: evidence from four US nationally representative data sets. *Qual Life Res*. 2010;19(8):1115-1124.
9. Michalos AC. Social Indicators Research and Health-Related Quality of Life Research. In: *Connecting the Quality of Life Theory to Health, Well-being and Education: The Selected Works of Alex C. Michalos*. Cham: Springer International Publishing; 2017:25-58.
10. Steptoe A, Deaton A, Stone AA. Subjective wellbeing, health, and ageing. *The Lancet*. 2015;385(9968):640-648.
11. Sousa KH, Kwok OM. Putting Wilson and Cleary to the test: analysis of a HRQOL conceptual model using structural equation modeling. *Qual Life Res*. 2006;15(4):725-737.
12. Waite LJ, Laumann EO, Das A, Schumm LP. Sexuality: measures of partnerships, practices, attitudes, and problems in the National Social Life, Health, and Aging Study. *J Gerontol B Psychol Sci Soc Sci*. 2009;64 Suppl 1:i56-66.
13. Han K, Song K, Choi BW. How to Develop, Validate, and Compare Clinical Prediction Models Involving Radiological Parameters: Study Design and Statistical Methods. *Korean J Radiol*. 2016;17(3):339-350.
14. Rodriguez AM, Mayo NE, Gagnon B. Independent contributors to overall quality of life in people with advanced cancer. *Br J Cancer*. 2013;108(9):1790-1800.
15. Schildcrout JS, Basford MA, Pulley JM, et al. An analytical approach to characterize morbidity profile dissimilarity between distinct cohorts using electronic medical records. *J Biomed Inform*. 2010;43(6):914-923.
16. Shiu AT, Choi KC, Lee DT, Yu DS, Man Ng W. Application of a health-related quality of life conceptual model in community-dwelling older Chinese people with diabetes to understand the relationships among clinical and psychological outcomes. *J Diabetes Investig*. 2014;5(6):677-686.
17. Rizzo VM, Kintner E. Understanding the impact of racial self-identification on perceptions of health-related quality of life: a multi-group analysis. *Qual Life Res*. 2013;22(8):2105-2112.
18. Chen Y, Feeley TH. Social support, social strain, loneliness, and well-being among older adults. *Journal of Social and Personal Relationships*. 2013;31(2):141-161.
19. Shiovitz-Ezra S, Leitsch S. The Role of Social Relationships in Predicting Loneliness: The National Social Life, Health, and Aging Project. *Social Work Research*. 34(3):157-167.



- 1
- 2
- 3 20. Rogers A, Brooks H, Vassilev I, Kennedy A, Blickem C, Reeves D. Why less may be more: a
- 4 mixed methods study of the work and relatedness of 'weak ties' in supporting long-term condition
- 5 self-management. *Implement Sci.* 2014;9:19.
- 6 21. Gesell SB, Barkin SL, Valente TW. Social network diagnostics: a tool for monitoring group
- 7 interventions. *Implement Sci.* 2013;8:116.
- 8 22. Crookes DM, Shelton RC, Tehranifar P, et al. Social networks and social support for healthy
- 9 eating among Latina breast cancer survivors: implications for social and behavioral interventions.
- 10 *J Cancer Surviv.* 2015.
- 11 23. Uchino BN, Ruiz JM, Smith TW, et al. The Strength of Family Ties: Perceptions of Network
- 12 Relationship Quality and Levels of C-Reactive Proteins in the North Texas Heart Study. *Ann*
- 13 *Behav Med.* 2015;49(5):776-781.
- 14 24. Druss BG, Zhao L, von Esenwein SA, et al. The Health and Recovery Peer (HARP) Program: a
- 15 peer-led intervention to improve medical self-management for persons with serious mental illness.
- 16 *Schizophr Res.* 2010;118(1-3):264-270.
- 17 25. Brito K, Edirimanne S, Eslick GD. The extent of improvement of health-related quality of life as
- 18 assessed by the SF36 and PASEIKA scales after parathyroidectomy in patients with primary
- 19 hyperparathyroidism--a systematic review and meta-analysis. *Int J Surg.* 2015;13:245-249.
- 20 26. Bekelman DB, Hooker S, Nowels CT, et al. Feasibility and acceptability of a collaborative care
- 21 intervention to improve symptoms and quality of life in chronic heart failure: mixed methods pilot
- 22 trial. *J Palliat Med.* 2014;17(2):145-151.
- 23 27. Chan R, Brooks R, Erlich J, et al. How do clinical and psychological variables relate to quality of
- 24 life in end-stage renal disease? Validating a proximal-distal model. *Qual Life Res.*
- 25 2014;23(2):677-686.
- 26 28. Bakas T, McLennon SM, Carpenter JS, et al. Systematic review of health-related quality of life
- 27 models. *Health Qual Life Outcomes.* 2012;10:134.
- 28 29. Phillips VL, Bonakdar Tehrani A, Langmuir H, Goode PS, Burgio KL. Treating Urge
- 29 Incontinence in Older Women: A Cost-Effective Investment in Quality-Adjusted Life-Years
- 30 (QALY). *Journal of Geriatrics.* 2015;2015:1-7.
- 31 30. Dumoulin C, Hay-Smith J, Habee-Seguin GM, Mercier J. Pelvic floor muscle training versus no
- 32 treatment, or inactive control treatments, for urinary incontinence in women: a short version
- 33 Cochrane systematic review with meta-analysis. *Neurourol Urodyn.* 2015;34(4):300-308.
- 34 31. X. F, N. V, M. Z, G. B, V. R. Symptomatic Pelvic Organ Prolapse at Midlife, Quality of Life, and
- 35 Risk Factors. *Obstetrics & Gynecology.* 113(3):609-616.
- 36 32. Kirchengast S, Haslinger B. Gender Differences in Health-Related Quality of Life Among Healthy
- 37 Aged and Old-Aged Austrians: Cross-Sectional Analysis *Gender Medicine.* 2008;5(3):270-278.
- 38 33. Mundet L, Ribas Y, Arco S, Clave P. Quality of Life Differences in Female and Male Patients
- 39 with Fecal Incontinence. *J Neurogastroenterol Motil.* 2016;22(1):94-101.
- 40
- 41
- 42
- 43
- 44
- 45
- 46
- 47
- 48
- 49
- 50
- 51
- 52
- 53
- 54
- 55
- 56
- 57
- 58
- 59
- 60

1  
2  
3 Figure 1. Operationalized Wilson Cleary Model with study-specific bio-psychosocial measures  
4  
5  
6  
7  
8  
9  
10  
11  
12  
13  
14  
15  
16  
17  
18  
19  
20  
21  
22  
23  
24  
25  
26  
27  
28  
29  
30  
31  
32  
33  
34  
35  
36  
37  
38  
39  
40  
41  
42  
43  
44  
45  
46  
47  
48  
49  
50  
51  
52  
53  
54  
55  
56  
57  
58  
59  
60



Figure 1. Operationalized Wilson Cleary Model with study-specific bio-psycho-social measures

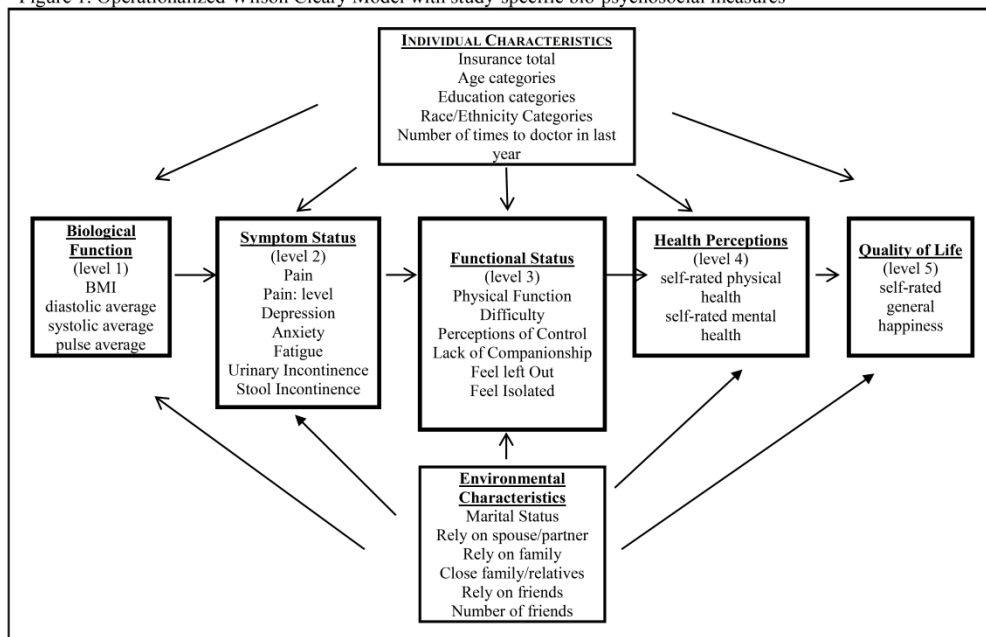

Figure 1 Operationalized Wilson Cleary Model with study-specific bio-psycho-social measures

564x372mm (300 x 300 DPI)

## STROBE Statement—checklist of items that should be included in reports of observational studies

## Correlates and Etiological Factors Associated with Hedonic Well-Being Among an Aging Population of US Men and Women: secondary data analysis of a national survey

Michelle Odlum, EdD, MPH<sup>1</sup>, Nicole Davis, PhD, RN<sup>2</sup>, Otis Owens, PhD, MPH, Michael Preston, PhD, MPH<sup>4</sup>, Russell Brewer, DrPH, MPH<sup>3</sup>, and Danielle Black, MS, MPH<sup>5,1</sup>

|                              | Item No | Recommendation                                                                                                                                                                                                                                                                                                                                                                                                                                                                                                                                                                                                                                                                                                    |
|------------------------------|---------|-------------------------------------------------------------------------------------------------------------------------------------------------------------------------------------------------------------------------------------------------------------------------------------------------------------------------------------------------------------------------------------------------------------------------------------------------------------------------------------------------------------------------------------------------------------------------------------------------------------------------------------------------------------------------------------------------------------------|
| <b>Title and abstract</b>    | 1       | (a) Indicate the study's design with a commonly used term in the title or the abstract <b>pages 2, 9</b><br>(b) Provide in the abstract an informative and balanced summary of what was done and what was found <b>page 2</b>                                                                                                                                                                                                                                                                                                                                                                                                                                                                                     |
| <b>Introduction</b>          |         |                                                                                                                                                                                                                                                                                                                                                                                                                                                                                                                                                                                                                                                                                                                   |
| Background/rationale         | 2       | Explain the scientific background and rationale for the investigation being reported <b>pages 3, 4</b>                                                                                                                                                                                                                                                                                                                                                                                                                                                                                                                                                                                                            |
| Objectives                   | 3       | State specific objectives, including any pre-specified hypotheses <b>page 2, 3</b>                                                                                                                                                                                                                                                                                                                                                                                                                                                                                                                                                                                                                                |
| <b>Methods</b>               |         |                                                                                                                                                                                                                                                                                                                                                                                                                                                                                                                                                                                                                                                                                                                   |
| Study design                 | 4       | Present key elements of study design early in the paper <b>page 3, 4</b>                                                                                                                                                                                                                                                                                                                                                                                                                                                                                                                                                                                                                                          |
| Setting                      | 5       | Describe the setting, locations, and relevant dates, including periods of recruitment, exposure, follow-up, and data collection <b>page 3, 4</b>                                                                                                                                                                                                                                                                                                                                                                                                                                                                                                                                                                  |
| Participants                 | 6       | (a) <i>Cohort study</i> —Give the eligibility criteria, and the sources and methods of selection of participants. Describe methods of follow-up<br><i>Case-control study</i> —Give the eligibility criteria, and the sources and methods of case ascertainment and control selection. Give the rationale for the choice of cases and controls<br><i>Cross-sectional study</i> —Give the eligibility criteria, and the sources and methods of selection of participants <b>page 3, 4</b><br>(b) <i>Cohort study</i> —For matched studies, give matching criteria and number of exposed and unexposed<br><i>Case-control study</i> —For matched studies, give matching criteria and the number of controls per case |
| Variables                    | 7       | Clearly define all outcomes, exposures, predictors, potential confounders, and effect modifiers. Give diagnostic criteria, if applicable <b>page 4, 9</b>                                                                                                                                                                                                                                                                                                                                                                                                                                                                                                                                                         |
| Data sources/<br>measurement | 8*      | For each variable of interest, give sources of data and details of methods of assessment (measurement). Describe comparability of assessment methods if there is more than one group <b>page 4</b>                                                                                                                                                                                                                                                                                                                                                                                                                                                                                                                |
| Bias                         | 9       | Describe any efforts to address potential sources of bias <b>N/A</b>                                                                                                                                                                                                                                                                                                                                                                                                                                                                                                                                                                                                                                              |
| Study size                   | 10      | Explain how the study size was arrived at <b>page 4</b>                                                                                                                                                                                                                                                                                                                                                                                                                                                                                                                                                                                                                                                           |
| Quantitative variables       | 11      | Explain how quantitative variables were handled in the analyses. If applicable, describe which groupings were chosen and why <b>page 4, 5</b>                                                                                                                                                                                                                                                                                                                                                                                                                                                                                                                                                                     |
| Statistical methods          | 12      | (a) Describe all statistical methods, including those used to control for confounding <b>page 5</b><br>(b) Describe any methods used to examine subgroups and interactions <b>page 5</b><br>(c) Explain how missing data were addressed <b>N/A</b>                                                                                                                                                                                                                                                                                                                                                                                                                                                                |

1  
2  
3  
4  
5  
6  
7  
8  
9  
10  
11  
12  
13  
14  
15  
16  
17  
18  
19  
20  
21  
22  
23  
24  
25  
26  
27  
28  
29  
30  
31  
32  
33  
34  
35  
36  
37  
38  
39  
40  
41  
42  
43  
44  
45  
46  
47  
48  
49  
50  
51  
52  
53  
54  
55  
56  
57  
58  
59  
60

(d) *Cohort study*—If applicable, explain how loss to follow-up was addressed  
*Case-control study*—If applicable, explain how matching of cases and controls was addressed  
*Cross-sectional study*—If applicable, describe analytical methods taking account of sampling strategy **N/A**

---

(e) Describe any sensitivity analyses

Continued on next page

For peer review only

| <b>Results</b>           |     |                                                                                                                                                                                                                                                                                                                                                                                                                                           |
|--------------------------|-----|-------------------------------------------------------------------------------------------------------------------------------------------------------------------------------------------------------------------------------------------------------------------------------------------------------------------------------------------------------------------------------------------------------------------------------------------|
| Participants             | 13* | (a) Report numbers of individuals at each stage of study—eg numbers potentially eligible, examined for eligibility, confirmed eligible, included in the study, completing follow-up, and analysed <b>page 4</b><br>(b) Give reasons for non-participation at each stage <b>N/A</b><br>(c) Consider use of a flow diagram <b>N/A</b>                                                                                                       |
| Descriptive data         | 14* | (a) Give characteristics of study participants (eg demographic, clinical, social) and information on exposures and potential confounders <b>page 4, 6</b><br>(b) Indicate number of participants with missing data for each variable of interest <b>N/A</b><br>(c) <i>Cohort study</i> —Summarise follow-up time (eg, average and total amount)                                                                                           |
| Outcome data             | 15* | <i>Cohort study</i> —Report numbers of outcome events or summary measures over time<br><i>Case-control study</i> —Report numbers in each exposure category, or summary measures of exposure<br><i>Cross-sectional study</i> —Report numbers of outcome events or summary measures <b>page 6-8</b>                                                                                                                                         |
| Main results             | 16  | (a) Give unadjusted estimates and, if applicable, confounder-adjusted estimates and their precision (eg, 95% confidence interval). Make clear which confounders were adjusted for and why they were included <b>page 5, 7</b><br>(b) Report category boundaries when continuous variables were categorized <b>N/A</b><br>(c) If relevant, consider translating estimates of relative risk into absolute risk for a meaningful time period |
| Other analyses           | 17  | Report other analyses done—eg analyses of subgroups and interactions, and sensitivity analyses <b>page 5</b>                                                                                                                                                                                                                                                                                                                              |
| <b>Discussion</b>        |     |                                                                                                                                                                                                                                                                                                                                                                                                                                           |
| Key results              | 18  | Summarise key results with reference to study objectives <b>page 6-8</b>                                                                                                                                                                                                                                                                                                                                                                  |
| Limitations              | 19  | Discuss limitations of the study, taking into account sources of potential bias or imprecision. Discuss both direction and magnitude of any potential bias <b>page 9</b>                                                                                                                                                                                                                                                                  |
| Interpretation           | 20  | Give a cautious overall interpretation of results considering objectives, limitations, multiplicity of analyses, results from similar studies, and other relevant evidence <b>page 8, 9</b>                                                                                                                                                                                                                                               |
| Generalisability         | 21  | Discuss the generalisability (external validity) of the study results <b>page 8, 9</b>                                                                                                                                                                                                                                                                                                                                                    |
| <b>Other information</b> |     |                                                                                                                                                                                                                                                                                                                                                                                                                                           |
| Funding                  | 22  | Give the source of funding and the role of the funders for the present study and, if applicable, for the original study on which the present article is based <b>page 10</b>                                                                                                                                                                                                                                                              |

\*Give information separately for cases and controls in case-control studies and, if applicable, for exposed and unexposed groups in cohort and cross-sectional studies.

**Note:** An Explanation and Elaboration article discusses each checklist item and gives methodological background and published examples of transparent reporting. The STROBE checklist is best used in conjunction with this article (freely available on the Web sites of PLoS Medicine at <http://www.plosmedicine.org/>, Annals of Internal Medicine at <http://www.annals.org/>, and Epidemiology at <http://www.epidem.com/>). Information on the STROBE Initiative is available at [www.strobe-statement.org](http://www.strobe-statement.org).
